# Supplementary material
Source: Research Square preprint supplement (doi:10.21203/rs.3.rs-9309714/v1)
Supplement: Supplementary file 1 [file 34d351cf56fd220879260638.xlsx]

## Sheet: All_1230_Lipid_Species
Metabolite_ID	Name	Class	Direction	Paired_Wilcoxon_p	Effect_Size_r	Median_FC	N_up	N_down	Complete_pairs	N_imputed_28	CI_lo	CI_hi	CI_excludes_1	Global_BH_q	Within_Class_q	Priority
HML0040	DAG 20:1-20:5	DG	Down	0.000244141	0.8641	0.9456	1	13	14	0	0.93	0.9764	Yes	0.300293	0.01123	Complete-data signal not prioritized
HML0382	PG 18:2-20:0	PG	Up	0.0012207	0.7969	1.2974	11	2	13	1	1.213	1.5659	Yes	0.550537	0.194824	Partially imputed exploratory signal
HML0351	PG 16:1-22:1	PG	Up	0.00231934	0.7634	1.3548	12	2	14	0	1.0243	1.6573	Yes	0.550537	0.194824	Robust candidate
HML0911	PS 20:5-22:4	PS	—	0.00231934	0.7634		0	0	0	27			No	0.550537	0.220032	Heavily imputed exploratory signal
HML0534	PE 22:4-22:6	PE	Up	0.00305176	0.7466	1.2194	12	2	14	0	1.0622	1.4277	Yes	0.550537	0.192902	Complete-data signal not prioritized
HML0012	Cer d18:1/26:0	Cer	Up	0.00402832	0.7298	1.3082	12	2	14	0	1.1595	1.6676	Yes	0.550537	0.052368	Robust candidate
HML0942	SM 40:4	SM	Up	0.00402832	0.7298	1.3085	11	3	14	0	1.0526	1.5494	Yes	0.550537	0.139856	Complete-data signal not prioritized
HML0530	PE 22:3-22:5	PE	Up	0.00402832	0.7298	1.0311	9	3	12	2	0.9993	1.0841	No	0.550537	0.192902	Partially imputed exploratory signal
HML1404	TAG58:5-FA18:1	Other	Up	0.00402832	0.7298	1.4501	11	0	11	3	1.0742	2.0727	Yes	0.550537	1	Partially imputed exploratory signal
HML0249	PE 18:3-20:0	PE	Down	0.00464943	0.7564	0.9965	0	1	2	18			No	0.57188	0.192902	Heavily imputed exploratory signal
HML0205	PE 16:1-18:3	PE	Down	0.00524902	0.7131	0.9984	0	1	1	21			No	0.586936	0.192902	Heavily imputed exploratory signal
HML0943	SM 40:5	SM	Up	0.00671387	0.6963	1.44	12	2	14	0	1.0524	1.6384	Yes	0.635235	0.139856	Robust candidate
HMDB0010166	PS 18:0-22:5	PS	Up	0.00671387	0.6963	1.3319	12	2	14	0	1.0589	1.4663	Yes	0.635235	0.220032	Complete-data signal not prioritized
HMDB0112434	PS 18:2-20:5	PS	Up	0.00854492	0.6795	1.0841	11	3	14	0	1.0218	1.1462	Yes	0.685896	0.220032	Complete-data signal not prioritized
HML0898	PS 20:3-22:6	PS	Up	0.00854492	0.6795	1.2712	12	2	14	0	1.0924	1.647	Yes	0.685896	0.220032	Complete-data signal not prioritized
HML0336	PG 16:0-22:1	PG	Up	0.0134277	0.6459	1.0872	11	3	14	0	1.0255	1.1267	Yes	0.685896	0.649414	Complete-data signal not prioritized
HML0314	PE 20:3-22:5	PE	Up	0.0134277	0.6459	1.2006	9	3	12	2	1.0077	1.5248	Yes	0.685896	0.327081	Partially imputed exploratory signal
HML0924	SM 37:1	SM	Up	0.0134277	0.6459	1.1707	11	3	14	0	1.0198	1.357	Yes	0.685896	0.139856	Robust candidate
HML0238	PE 18:1-22:3	PE	Up	0.0134277	0.6459	1.108	9	0	9	5	1.054	1.1645	Yes	0.685896	0.327081	Partially imputed exploratory signal
HML0954	SM 42:4	SM	Up	0.0134277	0.6459	1.1173	11	3	14	0	1.0221	1.2321	Yes	0.685896	0.139856	Complete-data signal not prioritized
HML1399	TAG58:10-FA20:5	Other	Up	0.0159064	0.6444	1.1759	10	2	13	1	1.0708	2.384	Yes	0.685896	1	Partially imputed exploratory signal
HMDB0112429	PS 18:2-20:0	PS	Up	0.0166016	0.6292	1.2527	11	3	14	0	1.1086	1.3058	Yes	0.685896	0.341992	Complete-data signal not prioritized
HML0933	SM 39:1	SM	Up	0.0166016	0.6292	1.2132	11	3	14	0	1.0071	1.4482	Yes	0.685896	0.139856	Complete-data signal not prioritized
HML0931	SM 38:4	SM	Down	0.0166016	0.6292	0.9651	4	10	14	0	0.9287	0.9961	Yes	0.685896	0.139856	Complete-data signal not prioritized
HMDB0009000	PE 18:0-20:2	PE	Up	0.0166016	0.6292	1.1511	11	3	14	0	1.0183	1.2326	Yes	0.685896	0.327081	Complete-data signal not prioritized
HMDB0009843	PI 18:1-20:3	PI	—	0.0202637	0.6124		0	0	0	22			No	0.685896	0.958689	Heavily imputed exploratory signal
HMDB0009405	PE 20:4-22:4	PE	Up	0.0202637	0.6124	1.0794	10	4	14	0	1.0044	1.3312	Yes	0.685896	0.327081	Complete-data signal not prioritized
HMDB0009111	PE 18:2-22:6	PE	Up	0.0202637	0.6124	1.1539	11	3	14	0	1.0173	1.4276	Yes	0.685896	0.327081	Complete-data signal not prioritized
HML0009	Cer d18:1/22:0	Cer	Up	0.0202637	0.6124	1.163	11	3	14	0	1.0253	1.4589	Yes	0.685896	0.106323	Complete-data signal not prioritized
HML0057	LPE 22:0	LPE	Up	0.0202637	0.6124	1.0238	11	3	14	0	1.008	1.0708	Yes	0.685896	0.486328	Complete-data signal not prioritized
HML0777	PS 16:0-20:0	PS	Up	0.0202637	0.6124	1.1223	11	3	14	0	1.0055	1.3389	Yes	0.685896	0.34786	Complete-data signal not prioritized
HML0626	PI 16:0-20:5	PI	Up	0.0245361	0.5956	1.2835	9	3	12	3	1.003	1.4485	Yes	0.685896	0.958689	Partially imputed exploratory signal
HML0010	Cer d18:1/24:0	Cer	Up	0.0245361	0.5956	1.1913	12	2	14	0	1.0526	1.736	Yes	0.685896	0.106323	Complete-data signal not prioritized
HML0535	PE 22:5-22:5	PE	Up	0.0245361	0.5956	1.149	11	3	14	0	1.0244	1.2829	Yes	0.685896	0.327081	Complete-data signal not prioritized
HML0928	SM 38:1	SM	Up	0.0245361	0.5956	1.0724	10	4	14	0	0.9694	1.1314	No	0.685896	0.139856	Complete-data nominal signal
HML1312	TAG54:6-FA22:5	Other	Up	0.0245361	0.5956	1.7336	11	3	14	0	1.089	2.1954	Yes	0.685896	1	Complete-data signal not prioritized
HMDB0010382	LPC 16:0	LPC	Up	0.0245361	0.5956	1.0557	9	5	14	0	0.9933	1.0693	No	0.685896	0.251221	Complete-data nominal signal
HML0968	SM 44:4	SM	Up	0.0245361	0.5956	1.2049	10	4	14	0	0.9945	1.5306	No	0.685896	0.139856	Complete-data nominal signal
HML0965	SM 44:1	SM	Up	0.0245361	0.5956	1.2404	11	3	14	0	1.0767	1.3894	Yes	0.685896	0.139856	Complete-data signal not prioritized
HMDB0009045	PE 18:1-22:6	PE	Up	0.0245361	0.5956	1.1747	12	2	14	0	1.0248	1.3435	Yes	0.685896	0.327081	Complete-data signal not prioritized
HML0390	PG 18:2-22:4	PG	Up	0.0245361	0.5956	1.0515	8	4	12	2	0.9741	1.1375	No	0.685896	0.649414	Partially imputed exploratory signal
HML0934	SM 39:2	SM	Up	0.0245361	0.5956	1.134	12	2	14	0	1.0473	1.2868	Yes	0.685896	0.139856	Complete-data signal not prioritized
HML0754	PI 20:3-22:2	PI	Up	0.0245361	0.5956	1.2371	4	2	6	9	0.8061	1.5424	No	0.685896	0.958689	Partially imputed exploratory signal
HML1430	TAG60:10-FA22:5	Other	Up	0.0245361	0.5956	4.1131	5	0	5	11	2.0212	4.6811	Yes	0.685896	1	Heavily imputed exploratory signal
HML0555	PG 22:2-22:6	PG	—	0.0280561	0.587	1	0	0	2	17			No	0.735253	0.649414	Heavily imputed exploratory signal
HML0366	PG 18:0-22:1	PG	Up	0.029541	0.5788	1.1011	10	4	14	0	0.9923	1.2649	No	0.735253	0.649414	Complete-data nominal signal
HML0956	SM 42:6	SM	Up	0.029541	0.5788	1.2169	10	4	14	0	0.9705	1.3857	No	0.735253	0.153076	Complete-data nominal signal
HMDB0009109	PE 18:2-22:5	PE	Up	0.029541	0.5788	1.2145	11	3	14	0	1.001	1.8401	Yes	0.735253	0.327081	Complete-data signal not prioritized
HML0260	PE 18:3-22:5	PE	Up	0.029541	0.5788	1.0366	7	2	9	7	0.9616	1.0598	No	0.735253	0.327081	Partially imputed exploratory signal
HML0330	PE 20:5-22:6	PE	Up	0.032767	0.5706	1.095	11	3	14	0	1.0418	1.141	Yes	0.735253	0.327081	Complete-data signal not prioritized
HML0319	PE 20:4-22:2	PE	Up	0.0352783	0.5621	1.1164	11	3	14	0	1.0062	1.4112	Yes	0.735253	0.327081	Complete-data signal not prioritized
HMDB0010383	LPC 16:1	LPC	Up	0.0352783	0.5621	1.447	11	3	14	0	1.018	2.0439	Yes	0.735253	0.251221	Complete-data signal not prioritized
HMDB0009812	PI 18:0-20:2	PI	—	0.0352783	0.5621	1.0636	3	3	6	9	0.8048	1.3627	No	0.735253	0.958689	Partially imputed exploratory signal
HML0890	PS 20:3-20:3	PS	—	0.0352783	0.5621		0	0	0	26			No	0.735253	0.454208	Heavily imputed exploratory signal
HML0941	SM 40:3	SM	Up	0.0352783	0.5621	1.1002	9	5	14	0	0.9744	1.1443	No	0.735253	0.167572	Complete-data nominal signal
HML0786	PS 16:1-20:0	PS	Up	0.0352783	0.5621	1.2071	12	2	14	0	1.0941	1.4039	Yes	0.735253	0.454208	Complete-data signal not prioritized
HMDB0010402	LPC 22:5	LPC	Up	0.0418701	0.5453	1.3409	11	3	14	0	1.0888	1.499	Yes	0.735253	0.251221	Complete-data signal not prioritized
HML0013	Cer d18:1/26:1	Cer	Up	0.0418701	0.5453	1.1566	10	4	14	0	1.0047	1.4092	Yes	0.735253	0.12854	Complete-data signal not prioritized
HML1305	TAG54:6-FA16:1	Other	Up	0.0418701	0.5453	1.404	12	2	14	0	1.118	2.5147	Yes	0.735253	1	Complete-data signal not prioritized
HML0661	PI 18:1-20:0	PI	Up	0.0418701	0.5453	1.6876	1	0	1	21			No	0.735253	0.958689	Heavily imputed exploratory signal
HML0049	LPC 19:1	LPC	Up	0.0418701	0.5453	1.2155	10	4	14	0	1.0301	1.2535	Yes	0.735253	0.251221	Complete-data signal not prioritized
HML0519	PE 22:1-22:3	PE	—	0.0418701	0.5453		0	0	0	21			No	0.735253	0.327081	Heavily imputed exploratory signal
HMDB0009009	PE 18:0-22:4	PE	Up	0.0418701	0.5453	1.3884	11	3	14	0	1.0738	1.7547	Yes	0.735253	0.327081	Complete-data signal not prioritized
HMDB0009093	PE 18:2-18:2	PE	—	0.0418701	0.5453		0	0	0	21			No	0.735253	0.327081	Heavily imputed exploratory signal
HMDB0009038	PE 18:1-20:5	PE	Up	0.0445008	0.537	1.0658	11	3	14	0	1.0172	1.0793	Yes	0.735253	0.327081	Complete-data signal not prioritized
HML0276	PE 20:0-20:1	PE	—	0.0445008	0.537	1	3	3	6	11	0.9828	1.0188	No	0.735253	0.327081	Heavily imputed exploratory signal
HML0556	PG 22:3-22:3	PG	—	0.0494385	0.5285		0	0	0	24			No	0.735253	0.649414	Heavily imputed exploratory signal
HML0571	PI 22:0-22:5	PI	Up	0.0494385	0.5285	1.6297	1	0	1	17			No	0.735253	0.958689	Heavily imputed exploratory signal
HML0940	SM 40:2	SM	Up	0.0494385	0.5285	1.0973	10	4	14	0	0.9727	1.1818	No	0.735253	0.192737	Complete-data nominal signal
HML0812	PS 18:1-20:1	PS	Up	0.0494385	0.5285	1.1809	11	3	14	0	1.0732	1.3223	Yes	0.735253	0.459407	Complete-data signal not prioritized
HML0322	PE 20:4-22:6	PE	Up	0.0494385	0.5285	1.231	8	6	14	0	0.8733	1.4602	No	0.735253	0.330339	Complete-data nominal signal
HML0629	PI 16:0-22:3	PI	Down	0.0494385	0.5285	0.9182	0	2	2	14			No	0.735253	0.958689	Heavily imputed exploratory signal
HML0826	PS 18:2-22:4	PS	Up	0.0494385	0.5285	1.3173	10	4	14	0	0.9971	2.103	No	0.735253	0.459407	Complete-data nominal signal
HML0007	Cer d18:1/20:0	Cer	Up	0.0494385	0.5285	1.2258	9	5	14	0	0.9216	1.8361	No	0.735253	0.12854	Complete-data nominal signal
HML0418	PG 18:4-22:5	PG	—	0.0494385	0.5285		0	0	0	24			No	0.735253	0.649414	Heavily imputed exploratory signal
HML0967	SM 44:3	SM	Up	0.0494385	0.5285	1.3251	9	5	14	0	0.9194	1.5792	No	0.735253	0.192737	Complete-data nominal signal
HML0357	PG 17:0-17:0	PG	—	0.0494385	0.5285		0	0	0	18			No	0.735253	0.649414	Heavily imputed exploratory signal
HML0326	PE 20:5-22:2	PE	Up	0.0494385	0.5285	1.0482	3	0	3	13	1.0182	1.2618	Yes	0.735253	0.330339	Heavily imputed exploratory signal
HML0045	DAG 20:1-22:5	DG	Down	0.0494385	0.5285	0.985	0	1	1	21			No	0.735253	0.799547	Heavily imputed exploratory signal
HML1325	TAG54:8-FA20:5	Other	Up	0.0494385	0.5285	1.3508	10	4	14	0	1.0707	1.5443	Yes	0.735253	1	Complete-data signal not prioritized
HML0396	PG 18:3-20:3	PG	—	0.0494385	0.5285		0	0	0	23			No	0.735253	0.649414	Heavily imputed exploratory signal
HML1226	TAG52:5-FA20:5	Other	Up	0.0579834	0.5117	1.1761	9	2	11	3			No	0.735253	1	Not significant
HML1314	TAG54:7-FA16:1	Other	Up	0.0579834	0.5117	1.6014	10	4	14	0			No	0.735253	1	Not significant
HML1320	TAG54:7-FA22:5	Other	Up	0.0579834	0.5117	1.7209	10	3	13	1			No	0.735253	1	Not significant
HML0925	SM 37:2	SM	Up	0.0579834	0.5117	1.1225	10	4	14	0			No	0.735253	0.192737	Not significant
HML0337	PG 16:0-22:2	PG	Up	0.0579834	0.5117	1.1165	11	3	14	0			No	0.735253	0.649414	Not significant
HML0335	PG 16:0-22:0	PG	Up	0.0579834	0.5117	1.131	10	4	14	0			No	0.735253	0.649414	Not significant
HML0620	PS 22:5-22:6	PS	Up	0.0579834	0.5117	1.1708	10	4	14	0			No	0.735253	0.459407	Not significant
HML0567	PI 22:0-22:1	PI	Down	0.0579834	0.5117	0.8325	1	5	6	10			No	0.735253	0.958689	Not significant
HML0935	SM 39:3	SM	Up	0.0579834	0.5117	1.0813	10	4	14	0			No	0.735253	0.192737	Not significant
HML0539	PG 22:0-22:1	PG	—	0.0579834	0.5117		0	0	0	22			No	0.735253	0.649414	Not significant
HML0548	PG 22:1-22:4	PG	Up	0.0579834	0.5117	1.0028	1	0	1	22			No	0.735253	0.649414	Not significant
HML1410	TAG58:6-FA22:5	Other	Up	0.0579834	0.5117	1.5691	9	1	10	5			No	0.735253	1	Not significant
HML0808	PS 18:0-22:2	PS	Up	0.0579834	0.5117	1.476	4	2	6	10			No	0.735253	0.459407	Not significant
HML0563	PG 22:5-22:5	PG	—	0.0579834	0.5117		0	0	0	24			No	0.735253	0.649414	Not significant
HMDB0112352	PS 16:0-22:4	PS	Up	0.0579834	0.5117	1.1493	3	0	3	15			No	0.735253	0.459407	Not significant
HMDB0009852	PI 18:2-20:1	PI	Down	0.0579834	0.5117	0.7796	2	4	6	10			No	0.735253	0.958689	Not significant
HML0640	PI 16:1-20:4	PI	—	0.067627	0.4949		0	0	0	25			No	0.742689	0.958689	Not significant
HML0636	PI 16:1-20:0	PI	Up	0.067627	0.4949	1.1249	6	2	8	8			No	0.742689	0.958689	Not significant
HML0882	PS 20:2-20:5	PS	Up	0.067627	0.4949	1.211	9	4	13	1			No	0.742689	0.497541	Not significant
HML0936	SM 39:4	SM	Up	0.067627	0.4949	1.0823	11	3	14	0			No	0.742689	0.192737	Not significant
HML0455	PG 20:2-22:6	PG	Up	0.067627	0.4949	1.2041	7	0	7	8			No	0.742689	0.660611	Not significant
HML1422	TAG58:8-FA20:4	Other	Up	0.067627	0.4949	1.4941	11	3	14	0			No	0.742689	1	Not significant
HML1427	TAG58:9-FA20:4	Other	Up	0.067627	0.4949	1.6936	11	3	14	0			No	0.742689	1	Not significant
HML0707	PI 18:4-22:1	PI	Down	0.067627	0.4949	0.9084	3	5	8	8			No	0.742689	0.958689	Not significant
HML1238	TAG53:1-FA16:0	Other	—	0.067627	0.4949		0	0	0	25			No	0.742689	1	Not significant
HML0465	PG 20:3-22:6	PG	Up	0.067627	0.4949	1.1937	8	0	8	7			No	0.742689	0.660611	Not significant
HML0948	SM 41:3	SM	Up	0.067627	0.4949	1.0617	10	4	14	0			No	0.742689	0.192737	Not significant
HML0918	SM 35:1	SM	Up	0.067627	0.4949	1.1289	10	4	14	0			No	0.742689	0.192737	Not significant
HML1311	TAG54:6-FA20:5	Other	Up	0.067627	0.4949	1.171	11	3	14	0			No	0.742689	1	Not significant
HML1255	TAG53:6-FA20:4	Other	Up	0.067627	0.4949	1.4749	10	3	13	1			No	0.742689	1	Not significant
HML0960	SM 43:3	SM	Up	0.067627	0.4949	1.1165	9	5	14	0			No	0.742689	0.192737	Not significant
HML0913	PS 20:5-22:6	PS	Up	0.0784912	0.4782	1.3046	10	4	14	0			No	0.767716	0.53562	Not significant
HMDB0009097	PE 18:2-20:0	PE	Up	0.0784912	0.4782	1.1528	10	4	14	0			No	0.767716	0.443777	Not significant
HMDB0009104	PE 18:2-20:5	PE	—	0.0784912	0.4782		0	0	0	19			No	0.767716	0.443777	Not significant
HML1421	TAG58:8-FA20:3	Other	Up	0.0784912	0.4782	1.5539	10	2	12	2			No	0.767716	1	Not significant
HML0685	PI 18:3-18:4	PI	Down	0.0784912	0.4782	0.9106	1	3	4	12			No	0.767716	0.958689	Not significant
HML1374	TAG56:7-FA18:0	Other	Up	0.0784912	0.4782	1.4802	10	4	14	0			No	0.767716	1	Not significant
HML0516	PE 22:0-22:6	PE	—	0.0784912	0.4782		0	0	0	21			No	0.767716	0.443777	Not significant
HML0939	SM 40:1	SM	Up	0.0784912	0.4782	1.1279	10	4	14	0			No	0.767716	0.213048	Not significant
HML0288	PE 20:1-20:1	PE	Down	0.0784912	0.4782	0.9896	1	2	3	18			No	0.767716	0.443777	Not significant
HML0419	PG 18:4-22:6	PG	Down	0.0784912	0.4782	0.9928	0	2	2	16			No	0.767716	0.660611	Not significant
HML0015	DAG 16:0-18:4	DG	—	0.0784912	0.4782		0	0	0	26			No	0.767716	0.799547	Not significant
HML0352	PG 16:1-22:2	PG	Up	0.0784912	0.4782	1.0158	7	4	11	3			No	0.767716	0.660611	Not significant
HML1225	TAG52:5-FA20:4	Other	Up	0.0784912	0.4782	1.4604	10	4	14	0			No	0.767716	1	Not significant
HML0423	PG 20:0-20:3	PG	Up	0.0786441	0.47	1.0224	7	3	10	4			No	0.767716	0.660611	Not significant
HML0807	PS 18:0-22:1	PS	Up	0.0905762	0.4614	1.034	2	0	2	17			No	0.819182	0.53562	Not significant
HMDB0002815	LPC 18:1	LPC	Up	0.0905762	0.4614	1.1652	10	4	14	0			No	0.819182	0.357647	Not significant
HML1373	TAG56:7-FA16:1	Other	Up	0.0905762	0.4614	1.5477	11	3	14	0			No	0.819182	1	Not significant
HML1385	TAG56:8-FA16:1	Other	Up	0.0905762	0.4614	1.3683	9	4	13	1			No	0.819182	1	Not significant
HMDB0010608	PG 18:0-20:3	PG	Down	0.0905762	0.4614	0.886	0	1	1	20			No	0.819182	0.6616	Not significant
HML0356	PG 16:1-22:6	PG	Up	0.0905762	0.4614	1.0009	1	0	1	20			No	0.819182	0.6616	Not significant
HML0431	PG 20:0-22:5	PG	—	0.0905762	0.4614		0	0	0	25			No	0.819182	0.6616	Not significant
HML0031	DAG 20:0-22:2	DG	Down	0.0905762	0.4614	0.6572	3	11	14	0			No	0.819182	0.799547	Not significant
HML0617	PS 22:4-22:5	PS	Up	0.0905762	0.4614	1.8949	6	2	8	7			No	0.819182	0.53562	Not significant
HML0698	PI 18:3-22:6	PI	Down	0.0905762	0.4614	0.8082	0	1	1	20			No	0.819182	0.958689	Not significant
HML0962	SM 43:5	SM	Up	0.104004	0.4446	1.0435	10	4	14	0			No	0.841611	0.237129	Not significant
HML0955	SM 42:5	SM	Up	0.104004	0.4446	1.0651	8	6	14	0			No	0.841611	0.237129	Not significant
HML0240	PE 18:1-22:5	PE	Up	0.104004	0.4446	1.2053	9	5	14	0			No	0.841611	0.546021	Not significant
HML1414	TAG58:7-FA18:2	Other	—	0.104004	0.4446	1.3223	6	6	12	2			No	0.841611	1	Not significant
HML1371	TAG56:6-FA22:6	Other	Up	0.104004	0.4446	4.614	1	0	1	17			No	0.841611	1	Not significant
HML0779	PS 16:0-22:0	PS	Up	0.104004	0.4446	1.1042	10	4	14	0			No	0.841611	0.53562	Not significant
HML0778	PS 16:0-20:1	PS	Up	0.104004	0.4446	1.6798	1	0	1	19			No	0.841611	0.53562	Not significant
HML0417	PG 18:4-22:4	PG	—	0.104004	0.4446	0.9776	1	1	2	21			No	0.841611	0.68878	Not significant
HMDB0112430	PS 18:2-20:1	PS	Up	0.104004	0.4446	1.0939	10	4	14	0			No	0.841611	0.53562	Not significant
HML1303	TAG54:5-FA22:5	Other	Up	0.104004	0.4446	1.538	8	5	13	1			No	0.841611	1	Not significant
HML0634	PI 16:1-18:3	PI	Up	0.104004	0.4446	1.057	1	0	1	23			No	0.841611	0.958689	Not significant
HML0919	SM 36:0	SM	Up	0.104004	0.4446	1.2321	8	6	14	0			No	0.841611	0.237129	Not significant
HML0926	SM 37:3	SM	Up	0.104004	0.4446	1.1601	9	5	14	0			No	0.841611	0.237129	Not significant
HML1302	TAG54:5-FA22:4	Other	Up	0.104004	0.4446	1.3148	10	4	14	0			No	0.841611	1	Not significant
HML0239	PE 18:1-22:4	PE	Down	0.104004	0.4446	0.9563	3	5	8	7			No	0.841611	0.546021	Not significant
HML1218	TAG52:5-FA14:0	Other	Up	0.104004	0.4446	1.9327	9	2	11	3			No	0.841611	1	Not significant
HMDB0010584	PG 16:0-22:6	PG	Down	0.115851	0.4202	0.9679	0	2	3	15			No	0.860251	0.68878	Not significant
HML0552	PG 22:2-22:3	PG	—	0.118896	0.4278		0	0	0	21			No	0.860251	0.68878	Not significant
HMDB0010680	PG 16:0-20:5	PG	Up	0.118896	0.4278	1.037	10	4	14	0			No	0.860251	0.68878	Not significant
HML0384	PG 18:2-20:2	PG	—	0.118896	0.4278	1.0075	2	2	4	14			No	0.860251	0.68878	Not significant
HML0529	PE 22:3-22:4	PE	—	0.118896	0.4278		0	0	0	22			No	0.860251	0.602682	Not significant
HML0581	PI 22:2-22:4	PI	Up	0.118896	0.4278	1.1942	1	0	1	16			No	0.860251	0.958689	Not significant
HML1321	TAG54:7-FA22:6	Other	Up	0.118896	0.4278	1.4483	10	4	14	0			No	0.860251	1	Not significant
HML0745	PI 20:2-22:3	PI	Down	0.118896	0.4278	0.9923	2	4	6	9			No	0.860251	0.958689	Not significant
HMDB0010379	LPC 14:0	LPC	Up	0.118896	0.4278	1.7089	10	4	14	0			No	0.860251	0.357647	Not significant
HMDB0009784	PI 16:0-18:2	PI	Down	0.118896	0.4278	0.8465	5	9	14	0			No	0.860251	0.958689	Not significant
HML0929	SM 38:2	SM	Up	0.118896	0.4278	1.1123	11	3	14	0			No	0.860251	0.251004	Not significant
HML0024	DAG 20:0-20:1	DG	Down	0.118896	0.4278	0.5899	5	9	14	0			No	0.860251	0.799547	Not significant
HML0338	PG 16:0-22:3	PG	Down	0.118896	0.4278	0.9413	0	2	2	18			No	0.860251	0.68878	Not significant
HML0621	PS 22:6-22:6	PS	Up	0.118896	0.4278	1.1268	10	4	14	0			No	0.860251	0.583159	Not significant
HMDB0010393	LPC 20:3	LPC	Up	0.118896	0.4278	1.4132	11	3	14	0			No	0.860251	0.357647	Not significant
HML0970	SM 44:6	SM	Up	0.118896	0.4278	1.148	10	4	14	0			No	0.860251	0.251004	Not significant
HMDB0007368	DAG 20:0-20:0	DG	Down	0.118896	0.4278	0.6075	4	10	14	0			No	0.860251	0.799547	Not significant
HML1405	TAG58:6-FA16:0	Other	Up	0.118896	0.4278	1.1644	9	3	12	2			No	0.860251	1	Not significant
HMDB0011489	LPE 20:5	LPE	Up	0.12395	0.4112	1.0222	9	5	14	0			No	0.880224	0.800455	Not significant
HML0451	PG 20:2-22:2	PG	—	0.132957	0.4016	1	0	0	1	20			No	0.880224	0.710083	Not significant
HMDB0010401	LPC 22:4	LPC	Up	0.135254	0.4111	1.1062	10	4	14	0			No	0.880224	0.357647	Not significant
HMDB0010384	LPC 18:0	LPC	Up	0.135254	0.4111	1.0675	9	5	14	0			No	0.880224	0.357647	Not significant
HML1235	TAG52:6-FA20:5	Other	Up	0.135254	0.4111	1.5748	11	3	14	0			No	0.880224	1	Not significant
HML0589	PI 22:4-22:5	PI	—	0.135254	0.4111	0.9957	1	1	2	18			No	0.880224	0.958689	Not significant
HML1217	TAG52:4-FA22:4	Other	Up	0.135254	0.4111	1.6959	8	5	13	1			No	0.880224	1	Not significant
HML0714	PI 20:0-20:1	PI	Up	0.135254	0.4111	1.1192	1	0	1	19			No	0.880224	0.958689	Not significant
HML1246	TAG53:3-FA16:0	Other	Up	0.135254	0.4111	1.3408	1	0	1	24			No	0.880224	1	Not significant
HML1237	TAG53:0-FA16:0	Other	Up	0.135254	0.4111	1.2023	7	2	9	7			No	0.880224	1	Not significant
HML0307	PE 20:2-22:6	PE	Up	0.135254	0.4111	1.0333	1	0	1	19			No	0.880224	0.605342	Not significant
HML0930	SM 38:3	SM	Up	0.135254	0.4111	1.0725	9	5	14	0			No	0.880224	0.275338	Not significant
HMDB0012406	PS 18:2-22:6	PS	Up	0.135254	0.4111	1.2605	9	5	14	0			No	0.880224	0.605702	Not significant
HML0349	PG 16:1-20:5	PG	Up	0.135254	0.4111	1.0094	3	1	4	12			No	0.880224	0.710083	Not significant
HML0637	PI 16:1-20:1	PI	—	0.135254	0.4111	1.1209	2	2	4	13			No	0.880224	0.958689	Not significant
HML1298	TAG54:5-FA20:3	Other	Up	0.135254	0.4111	1.1459	9	5	14	0			No	0.880224	1	Not significant
HML1319	TAG54:7-FA20:5	Other	Up	0.135254	0.4111	1.1676	10	4	14	0			No	0.880224	1	Not significant
HML0430	PG 20:0-22:4	PG	—	0.135254	0.4111		0	0	0	24			No	0.880224	0.710083	Not significant
HML0872	PS 20:1-20:4	PS	Up	0.135254	0.4111	1.5997	4	2	6	12			No	0.880224	0.605702	Not significant
HML0560	PG 22:4-22:4	PG	Up	0.148578	0.3861	1.0219	9	3	12	2			No	0.896589	0.734766	Not significant
HML0241	PE 18:2-18:4	PE	Down	0.151956	0.3829	0.9924	0	1	2	13			No	0.896589	0.605342	Not significant
HML0266	PE 18:4-20:3	PE	Down	0.151956	0.3829	0.9984	0	2	3	18			No	0.896589	0.605342	Not significant
HML0210	PE 16:1-20:3	PE	Down	0.151956	0.3829	0.9984	1	2	4	16			No	0.896589	0.605342	Not significant
HMDB0012403	PS 18:2-18:3	PS	Up	0.153076	0.3943	1.2226	7	2	9	6			No	0.896589	0.656952	Not significant
HML0949	SM 41:4	SM	Up	0.153076	0.3943	1.0491	8	6	14	0			No	0.896589	0.290845	Not significant
HML0006	Cer d18:1/18:0	Cer	Up	0.153076	0.3943	1.1911	9	5	14	0			No	0.896589	0.331665	Not significant
HML1417	TAG58:7-FA22:5	Other	Up	0.153076	0.3943	1.3719	10	4	14	0			No	0.896589	1	Not significant
HML1398	TAG58:10-FA20:4	Other	Up	0.153076	0.3943	1.6648	10	4	14	0			No	0.896589	1	Not significant
HML0317	PE 20:4-22:0	PE	—	0.153076	0.3943	1.0044	1	1	2	15			No	0.896589	0.605342	Not significant
HMDB0009033	PE 18:1-20:2	PE	Up	0.153076	0.3943	1.0812	10	3	13	1			No	0.896589	0.605342	Not significant
HML1203	TAG52:3-FA20:3	Other	Up	0.153076	0.3943	1.2146	9	5	14	0			No	0.896589	1	Not significant
HML0657	PI 18:0-22:1	PI	Down	0.153076	0.3943	0.9224	5	7	12	2			No	0.896589	0.958689	Not significant
HML0230	PE 18:0-22:3	PE	Up	0.153076	0.3943	1.025	8	5	13	2			No	0.896589	0.605342	Not significant
HML0029	DAG 20:0-22:0	DG	Down	0.153076	0.3943	0.7452	5	9	14	0			No	0.896589	0.799547	Not significant
HML0413	PG 18:4-22:0	PG	—	0.153076	0.3943		0	0	0	21			No	0.896589	0.734766	Not significant
HMDB0012108	LPC 17:0	LPC	Up	0.153076	0.3943	1.2292	9	5	14	0			No	0.896589	0.357647	Not significant
HML1100	TAG49:3-FA15:0	Other	Up	0.153076	0.3943	1.405	4	0	4	14			No	0.896589	1	Not significant
HML0425	PG 20:0-20:5	PG	—	0.153076	0.3943		0	0	0	23			No	0.896589	0.734766	Not significant
HML0582	PI 22:2-22:5	PI	Up	0.153076	0.3943	1.477	3	0	3	13			No	0.896589	0.958689	Not significant
HML0946	SM 41:1	SM	Up	0.153076	0.3943	1.1301	8	6	14	0			No	0.896589	0.290845	Not significant
HML0269	PE 18:4-22:0	PE	—	0.157939	0.3774	1	1	1	4	14			No	0.909122	0.605342	Not significant
HML1406	TAG58:6-FA18:0	Other	Up	0.172607	0.3775	1.3864	8	6	14	0			No	0.909122	1	Not significant
HML1326	TAG54:8-FA22:6	Other	Up	0.172607	0.3775	1.674	11	3	14	0			No	0.909122	1	Not significant
HML0923	SM 37:0	SM	Up	0.172607	0.3775	1.117	8	6	14	0			No	0.909122	0.307457	Not significant
HML0282	PE 20:0-22:1	PE	Down	0.172607	0.3775	0.9968	1	2	3	17			No	0.909122	0.605342	Not significant
HML0721	PI 20:0-22:2	PI	—	0.172607	0.3775		0	0	0	22			No	0.909122	0.958689	Not significant
HML0686	PI 18:3-20:0	PI	Down	0.172607	0.3775	0.9302	1	4	5	11			No	0.909122	0.958689	Not significant
HML0321	PE 20:4-22:5	PE	Up	0.172607	0.3775	1.1272	8	5	13	1			No	0.909122	0.605342	Not significant
HMDB0008944	PE 16:0-22:5	PE	Up	0.172607	0.3775	1.1726	10	4	14	0			No	0.909122	0.605342	Not significant
HML1370	TAG56:6-FA22:5	Other	Up	0.172607	0.3775	1.2964	9	5	14	0			No	0.909122	1	Not significant
HML1291	TAG54:5-FA16:0	Other	Up	0.172607	0.3775	1.3564	10	4	14	0			No	0.909122	1	Not significant
HML0549	PG 22:1-22:5	PG	—	0.172607	0.3775		0	0	0	20			No	0.909122	0.74354	Not significant
HML0458	PG 20:3-20:5	PG	—	0.172607	0.3775		0	0	0	26			No	0.909122	0.74354	Not significant
HML1134	TAG50:4-FA16:1	Other	Up	0.172607	0.3775	1.2651	10	4	14	0			No	0.909122	1	Not significant
HML1351	TAG56:5-FA18:0	Other	Up	0.172607	0.3775	1.3553	9	5	14	0			No	0.909122	1	Not significant
HMDB0010654	PG 18:0-20:5	PG	Down	0.172607	0.3775	0.9869	0	1	1	19			No	0.909122	0.74354	Not significant
HML0805	PS 18:0-20:5	PS	Up	0.172607	0.3775	1.8095	6	1	7	10			No	0.909122	0.658465	Not significant
HML0459	PG 20:3-22:0	PG	Down	0.172607	0.3775	0.9672	0	1	1	20			No	0.909122	0.74354	Not significant
HML0938	SM 40:0	SM	Up	0.172607	0.3775	1.3289	10	4	14	0			No	0.909122	0.307457	Not significant
HML0592	PI 22:5-22:6	PI	Down	0.172607	0.3775	0.8832	2	3	5	11			No	0.909122	0.958689	Not significant
HMDB0112649	PS 20:4-22:4	PS	—	0.172607	0.3775	1.0356	7	7	14	0			No	0.909122	0.658465	Not significant
HML0226	PE 18:0-20:1	PE	Up	0.172607	0.3775	1.0974	9	5	14	0			No	0.909122	0.605342	Not significant
HML0780	PS 16:0-22:1	PS	Up	0.172607	0.3775	1.1427	9	5	14	0			No	0.909122	0.658465	Not significant
HML0515	PE 22:0-22:5	PE	Down	0.172955	0.3642	0.9992	0	1	2	17			No	0.909122	0.605342	Not significant
HML0354	PG 16:1-22:4	PG	Down	0.193726	0.3607	0.9779	0	1	1	18			No	0.910775	0.757935	Not significant
HML0749	PI 20:3-20:3	PI	Down	0.193726	0.3607	0.9273	0	1	1	17			No	0.910775	0.958689	Not significant
HML1242	TAG53:2-FA16:0	Other	Up	0.193726	0.3607	1.2588	2	1	3	16			No	0.910775	1	Not significant
HMDB0010395	LPC 20:4	LPC	Up	0.193726	0.3607	1.1348	9	5	14	0			No	0.910775	0.357647	Not significant
HML0213	PE 16:1-22:0	PE	—	0.193726	0.3607		0	0	0	22			No	0.910775	0.612178	Not significant
HML0350	PG 16:1-22:0	PG	Up	0.193726	0.3607	1.3266	10	4	14	0			No	0.910775	0.757935	Not significant
HML1228	TAG52:6-FA14:0	Other	Up	0.193726	0.3607	1.6071	9	3	12	2			No	0.910775	1	Not significant
HML0958	SM 43:1	SM	Up	0.193726	0.3607	1.1282	9	5	14	0			No	0.910775	0.334617	Not significant
HML0050	LPC 20:0	LPC	Up	0.193726	0.3607	1.1577	8	6	14	0			No	0.910775	0.357647	Not significant
HML0200	PE 16:0-22:1	PE	Up	0.193726	0.3607	1.0068	2	0	2	17			No	0.910775	0.612178	Not significant
HML1381	TAG56:7-FA22:4	Other	Up	0.193726	0.3607	1.6406	9	5	14	0			No	0.910775	1	Not significant
HMDB0011487	LPE 20:4	LPE	Up	0.193726	0.3607	1.2262	9	5	14	0			No	0.910775	0.800455	Not significant
HML0806	PS 18:0-22:0	PS	Up	0.193726	0.3607	1.1732	8	6	14	0			No	0.910775	0.708488	Not significant
HMDB0009816	PI 18:0-20:4	PI	Up	0.193726	0.3607	1.0894	8	6	14	0			No	0.910775	0.958689	Not significant
HML1148	TAG50:6-FA20:4	Other	Up	0.193726	0.3607	1.1741	8	3	11	3			No	0.910775	1	Not significant
HML1130	TAG50:3-FA20:3	Other	Up	0.193726	0.3607	2.5653	9	5	14	0			No	0.910775	1	Not significant
HML1102	TAG49:3-FA16:1	Other	Up	0.193726	0.3607	1.3734	10	4	14	0			No	0.910775	1	Not significant
HMDB0011483	LPE 20:2	LPE	Up	0.193726	0.3607	1.0686	10	4	14	0			No	0.910775	0.800455	Not significant
HML1347	TAG56:4-FA20:3	Other	Up	0.193726	0.3607	1.5375	9	5	14	0			No	0.910775	1	Not significant
HMDB0010397	LPC 20:5	LPC	Up	0.193726	0.3607	1.0762	9	5	14	0			No	0.910775	0.357647	Not significant
HML0510	PE 22:0-22:0	PE	Up	0.207857	0.3366	1.0008	8	3	12	2			No	0.910775	0.612178	Not significant
HML0675	PI 18:2-20:4	PI	—	0.216553	0.3439	1.0672	1	1	2	19			No	0.910775	0.958689	Not significant
HML0663	PI 18:1-20:2	PI	—	0.216553	0.3439	1.1621	1	1	2	17			No	0.910775	0.958689	Not significant
HML0735	PI 20:1-22:4	PI	Up	0.216553	0.3439	1.1509	2	0	2	15			No	0.910775	0.958689	Not significant
HML0362	PG 18:0-20:0	PG	Down	0.216553	0.3439	0.9444	5	8	13	1			No	0.910775	0.757935	Not significant
HMDB0007199	DAG 18:1-20:4	DG	Up	0.216553	0.3439	1.2192	10	4	14	0			No	0.910775	0.799547	Not significant
HML0616	PS 22:4-22:4	PS	Up	0.216553	0.3439	1.3886	9	5	14	0			No	0.910775	0.708488	Not significant
HML0524	PE 22:2-22:3	PE	Up	0.216553	0.3439	1.0114	1	0	1	20			No	0.910775	0.612178	Not significant
HML0368	PG 18:0-22:3	PG	Up	0.216553	0.3439	1.0042	3	2	5	12			No	0.910775	0.757935	Not significant
HML1205	TAG52:4-FA14:0	Other	Up	0.216553	0.3439	1.545	10	4	14	0			No	0.910775	1	Not significant
HML1248	TAG53:3-FA18:2	Other	Up	0.216553	0.3439	1.2172	2	1	3	18			No	0.910775	1	Not significant
HMDB0009839	PI 18:1-18:3	PI	Down	0.216553	0.3439	0.9159	0	1	1	14			No	0.910775	0.958689	Not significant
HMDB0009010	PE 18:0-22:5	PE	Up	0.216553	0.3439	1.2513	10	3	13	1			No	0.910775	0.612178	Not significant
HMDB0011496	LPE 22:6	LPE	—	0.216553	0.3439	0.9806	7	7	14	0			No	0.910775	0.800455	Not significant
HML0553	PG 22:2-22:4	PG	Up	0.216553	0.3439	1.0069	2	0	2	16			No	0.910775	0.757935	Not significant
HML0398	PG 18:3-20:5	PG	Up	0.216553	0.3439	1.0173	1	0	1	14			No	0.910775	0.757935	Not significant
HML1046	TAG48:0-FA14:0	Other	—	0.216553	0.3439		0	0	0	27			No	0.910775	1	Not significant
HML1141	TAG50:5-FA16:0	Other	Up	0.216553	0.3439	1.4157	10	2	12	2			No	0.910775	1	Not significant
HML0448	PG 20:2-20:5	PG	—	0.216553	0.3439		0	0	0	26			No	0.910775	0.757935	Not significant
HML1114	TAG50:2-FA14:0	Other	Up	0.216553	0.3439	1.2312	10	4	14	0			No	0.910775	1	Not significant
HML0473	PG 20:4-22:6	PG	Up	0.216553	0.3439	1.0771	8	6	14	0			No	0.910775	0.757935	Not significant
HML0532	PE 22:4-22:4	PE	Down	0.216553	0.3439	0.9914	0	2	2	20			No	0.910775	0.612178	Not significant
HMDB0010167	PS 18:0-22:6	PS	Up	0.216553	0.3439	1.2396	9	4	13	1			No	0.910775	0.708488	Not significant
HMDB0010386	LPC 18:2	LPC	Up	0.216553	0.3439	1.1366	9	5	14	0			No	0.910775	0.361816	Not significant
HMDB0009012	PE 18:0-22:6	PE	Up	0.216553	0.3439	1.2438	9	5	14	0			No	0.910775	0.612178	Not significant
HMDB0010623	PG 18:1-20:3	PG	—	0.216553	0.3439	1.0127	2	2	4	12			No	0.910775	0.757935	Not significant
HML0283	PE 20:0-22:2	PE	—	0.216553	0.3439		0	0	0	22			No	0.910775	0.612178	Not significant
HML0303	PE 20:2-22:2	PE	Up	0.216553	0.3439	1.0106	1	0	1	22			No	0.910775	0.612178	Not significant
HML0220	PE 17:0-17:0	PE	—	0.216553	0.3439		0	0	0	19			No	0.910775	0.612178	Not significant
HML0033	DAG 20:0-22:4	DG	Down	0.216553	0.3439	0.8477	1	4	5	13			No	0.910775	0.799547	Not significant
HML1408	TAG58:6-FA20:4	Other	Up	0.216553	0.3439	1.5448	10	4	14	0			No	0.910775	1	Not significant
HML1423	TAG58:8-FA22:5	Other	Up	0.241211	0.3272	1.4327	9	5	14	0			No	0.910775	1	Not significant
HML0711	PI 18:4-22:5	PI	Down	0.241211	0.3272	0.9053	1	2	3	16			No	0.910775	0.958689	Not significant
HML1432	TAG60:11-FA22:5	Other	Up	0.241211	0.3272	1.4433	3	2	5	11			No	0.910775	1	Not significant
HML1345	TAG56:4-FA20:1	Other	Down	0.241211	0.3272	0.868	4	10	14	0			No	0.910775	1	Not significant
HML1380	TAG56:7-FA20:5	Other	Up	0.241211	0.3272	1.1629	10	4	14	0			No	0.910775	1	Not significant
HMDB0010392	LPC 20:2	LPC	Up	0.241211	0.3272	1.1929	9	5	14	0			No	0.910775	0.361816	Not significant
HML0699	PI 18:4-18:4	PI	—	0.241211	0.3272		0	0	0	22			No	0.910775	0.958689	Not significant
HML0236	PE 18:1-22:1	PE	Down	0.241211	0.3272	0.9946	0	1	1	19			No	0.910775	0.65663	Not significant
HML0047	LPC 17:1	LPC	Up	0.241211	0.3272	1.3933	8	6	14	0			No	0.910775	0.361816	Not significant
HML0228	PE 18:0-22:1	PE	—	0.241211	0.3272		0	0	0	20			No	0.910775	0.65663	Not significant
HML0370	PG 18:1-20:0	PG	Up	0.241211	0.3272	1.3173	9	5	14	0			No	0.910775	0.810469	Not significant
HML0041	DAG 20:1-22:1	DG	Down	0.241211	0.3272	0.6492	5	9	14	0			No	0.910775	0.799547	Not significant
HML0927	SM 38:0	SM	Up	0.241211	0.3272	1.0517	11	3	14	0			No	0.910775	0.392829	Not significant
HML1224	TAG52:5-FA20:3	Other	Up	0.241211	0.3272	1.3707	10	4	14	0			No	0.910775	1	Not significant
HMDB0112431	PS 18:2-20:2	PS	Down	0.241211	0.3272	0.8521	0	2	2	19			No	0.910775	0.708488	Not significant
HML1236	TAG52:6-FA22:6	Other	Up	0.241211	0.3272	1.6958	3	1	4	14			No	0.910775	1	Not significant
HML0566	PI 22:0-22:0	PI	Down	0.241211	0.3272	0.9102	2	3	5	11			No	0.910775	0.958689	Not significant
HML1165	TAG51:3-FA17:0	Other	Up	0.241211	0.3272	1.2832	10	4	14	0			No	0.910775	1	Not significant
HMDB0011492	LPE 22:2	LPE	Up	0.241211	0.3272	1.0012	5	2	7	8			No	0.910775	0.800455	Not significant
HML0893	PS 20:3-22:1	PS	Up	0.241211	0.3272	1.4651	9	4	13	1			No	0.910775	0.708488	Not significant
HML1133	TAG50:4-FA16:0	Other	Up	0.241211	0.3272	1.1605	9	5	14	0			No	0.910775	1	Not significant
HML1125	TAG50:3-FA16:1	Other	Up	0.241211	0.3272	1.2749	8	6	14	0			No	0.910775	1	Not significant
HML0789	PS 16:1-20:3	PS	Up	0.241211	0.3272	1.2489	1	0	1	23			No	0.910775	0.708488	Not significant
HML1318	TAG54:7-FA20:4	Other	Up	0.241211	0.3272	1.3847	10	4	14	0			No	0.910775	1	Not significant
HML1324	TAG54:8-FA20:4	Other	Up	0.241211	0.3272	1.8243	10	3	13	1			No	0.910775	1	Not significant
HML0932	SM 39:0	SM	Up	0.241211	0.3272	1.1414	9	5	14	0			No	0.910775	0.392829	Not significant
HML0355	PG 16:1-22:5	PG	Up	0.241211	0.3272	1.0146	6	3	9	6			No	0.910775	0.810469	Not significant
HML1309	TAG54:6-FA20:3	Other	Up	0.241211	0.3272	1.2256	9	5	14	0			No	0.910775	1	Not significant
HML0736	PI 20:1-22:5	PI	Up	0.241211	0.3272	1.0481	4	3	7	9			No	0.910775	0.958689	Not significant
HML1262	TAG54:1-FA20:1	Other	Up	0.267578	0.3104	5.2913	1	0	1	22			No	0.910775	1	Not significant
HML0787	PS 16:1-20:1	PS	—	0.267578	0.3104	1.1201	3	3	6	10			No	0.910775	0.708488	Not significant
HML0701	PI 18:4-20:1	PI	—	0.267578	0.3104		0	0	0	20			No	0.910775	0.958689	Not significant
HML0710	PI 18:4-22:4	PI	Up	0.267578	0.3104	1.2022	5	1	6	9			No	0.910775	0.958689	Not significant
HMDB0010375	LPC 15:0	LPC	Up	0.267578	0.3104	1.0731	8	6	14	0			No	0.910775	0.377757	Not significant
HML1341	TAG56:4-FA16:0	Other	Up	0.267578	0.3104	1.8804	4	2	6	11			No	0.910775	1	Not significant
HML1382	TAG56:7-FA22:5	Other	Up	0.267578	0.3104	1.2433	9	5	14	0			No	0.910775	1	Not significant
HML1391	TAG56:8-FA22:5	Other	Up	0.267578	0.3104	1.3546	9	5	14	0			No	0.910775	1	Not significant
HMDB0009853	PI 18:2-20:2	PI	Down	0.267578	0.3104	0.5751	0	2	2	19			No	0.910775	0.958689	Not significant
HML1372	TAG56:7-FA16:0	Other	Up	0.267578	0.3104	1.2317	9	5	14	0			No	0.910775	1	Not significant
HML0280	PE 20:0-20:5	PE	Down	0.267578	0.3104	0.9792	0	2	2	20			No	0.910775	0.688936	Not significant
HML1269	TAG54:2-FA20:2	Other	Down	0.267578	0.3104	0.0702	0	1	1	22			No	0.910775	1	Not significant
HML0922	SM 36:3	SM	Up	0.267578	0.3104	1.1161	9	5	14	0			No	0.910775	0.412215	Not significant
HML1254	TAG53:5-FA20:4	Other	Up	0.267578	0.3104	1.1558	10	4	14	0			No	0.910775	1	Not significant
HML0585	PI 22:3-22:4	PI	Down	0.267578	0.3104	0.883	1	2	3	13			No	0.910775	0.958689	Not significant
HML0693	PI 18:3-22:1	PI	Down	0.267578	0.3104	0.8092	0	2	2	14			No	0.910775	0.958689	Not significant
HML0715	PI 20:0-20:2	PI	—	0.267578	0.3104		0	0	0	22			No	0.910775	0.958689	Not significant
HML1004	TAG46:0-FA12:0	Other	—	0.267578	0.3104	27.1296	1	1	2	18			No	0.910775	1	Not significant
HML0905	PS 20:4-22:6	PS	—	0.267578	0.3104	1.0527	7	7	14	0			No	0.910775	0.708488	Not significant
HML0759	PI 20:4-20:4	PI	Up	0.267578	0.3104	1.0929	1	0	1	21			No	0.910775	0.958689	Not significant
HML0591	PI 22:5-22:5	PI	Up	0.267578	0.3104	1.0901	2	0	2	17			No	0.910775	0.958689	Not significant
HML0751	PI 20:3-20:5	PI	—	0.267578	0.3104	1.0091	2	2	4	12			No	0.910775	0.958689	Not significant
HML0916	SM 34:2	SM	Up	0.267578	0.3104	1.0545	9	5	14	0			No	0.910775	0.412215	Not significant
HML0748	PI 20:2-22:6	PI	Up	0.267578	0.3104	1.1311	7	1	8	6			No	0.910775	0.958689	Not significant
HML1234	TAG52:6-FA20:4	Other	Up	0.267578	0.3104	1.5779	11	3	14	0			No	0.910775	1	Not significant
HML1172	TAG51:4-FA20:4	Other	Up	0.267578	0.3104	1.4219	10	2	12	2			No	0.910775	1	Not significant
HMDB0011129	LPE 18:0	LPE	Up	0.267578	0.3104	1.097	8	6	14	0			No	0.910775	0.800455	Not significant
HML1091	TAG49:1-FA17:0	Other	Up	0.267578	0.3104	1.2555	8	6	14	0			No	0.910775	1	Not significant
HML1124	TAG50:3-FA16:0	Other	Up	0.267578	0.3104	1.244	8	6	14	0			No	0.910775	1	Not significant
HML1131	TAG50:4-FA14:0	Other	Up	0.267578	0.3104	1.7492	11	3	14	0			No	0.910775	1	Not significant
HML1070	TAG48:3-FA18:2	Other	Up	0.267578	0.3104	1.4713	10	4	14	0			No	0.910775	1	Not significant
HML1362	TAG56:6-FA18:1	Other	Up	0.267578	0.3104	1.4245	8	6	14	0			No	0.910775	1	Not significant
HMDB0011484	LPE 20:3	LPE	Up	0.267578	0.3104	1.4674	9	5	14	0			No	0.910775	0.800455	Not significant
HML0466	PG 20:4-20:5	PG	Down	0.267578	0.3104	0.991	0	1	1	16			No	0.910775	0.864483	Not significant
HML0821	PS 18:2-20:3	PS	Down	0.267578	0.3104	0.7404	5	9	14	0			No	0.910775	0.708488	Not significant
HMDB0010653	PG 18:2-20:3	PG	Down	0.267578	0.3104	0.9682	0	3	3	14			No	0.910775	0.864483	Not significant
HML1360	TAG56:6-FA16:0	Other	Up	0.267578	0.3104	1.2222	8	6	14	0			No	0.910775	1	Not significant
HML0904	PS 20:4-22:5	PS	Up	0.267578	0.3104	1.0904	9	5	14	0			No	0.910775	0.708488	Not significant
HML1433	TAG60:11-FA22:6	Other	Up	0.267578	0.3104	1.4058	7	2	9	6			No	0.910775	1	Not significant
HML0810	PS 18:1-18:4	PS	—	0.267578	0.3104		0	0	0	25			No	0.910775	0.708488	Not significant
HML0511	PE 22:0-22:1	PE	Up	0.27183	0.2937	1.0032	9	2	11	3			No	0.910775	0.688936	Not significant
HML0293	PE 20:1-22:1	PE	—	0.278707	0.2895	1	0	0	1	20			No	0.910775	0.688936	Not significant
HML1412	TAG58:7-FA18:0	Other	Up	0.295776	0.2936	1.2222	9	5	14	0			No	0.910775	1	Not significant
HML1428	TAG58:9-FA22:5	Other	Up	0.295776	0.2936	1.585	9	5	14	0			No	0.910775	1	Not significant
HML1426	TAG58:9-FA18:2	Other	Up	0.295776	0.2936	1.0906	8	5	13	1			No	0.910775	1	Not significant
HMDB0007121	DAG 18:1-20:5	DG	Up	0.295776	0.2936	1.1019	8	6	14	0			No	0.910775	0.799547	Not significant
HML1136	TAG50:4-FA18:2	Other	Up	0.295776	0.2936	1.3811	10	4	14	0			No	0.910775	1	Not significant
HML1142	TAG50:5-FA16:1	Other	Up	0.295776	0.2936	1.7806	10	4	14	0			No	0.910775	1	Not significant
HMDB0007132	DAG 16:1-18:2	DG	Up	0.295776	0.2936	1.1688	9	5	14	0			No	0.910775	0.799547	Not significant
HML1103	TAG49:3-FA18:2	Other	Up	0.295776	0.2936	1.3666	11	3	14	0			No	0.910775	1	Not significant
HMDB0112382	PS 18:0-22:4	PS	Up	0.295776	0.2936	1.5387	9	5	14	0			No	0.910775	0.708488	Not significant
HMDB0012427	PS 20:3-20:4	PS	Up	0.295776	0.2936	1.055	7	3	10	4			No	0.910775	0.708488	Not significant
HML1094	TAG49:2-FA15:0	Other	Up	0.295776	0.2936	1.2298	10	4	14	0			No	0.910775	1	Not significant
HMDB0112394	PS 18:1-20:2	PS	Up	0.295776	0.2936	1.2186	7	0	7	9			No	0.910775	0.708488	Not significant
HML1190	TAG52:2-FA20:0	Other	Up	0.295776	0.2936	1.0118	4	3	7	9			No	0.910775	1	Not significant
HML0538	PG 22:0-22:0	PG	—	0.295776	0.2936	1.0028	1	1	2	15			No	0.910775	0.873333	Not significant
HML1350	TAG56:5-FA16:0	Other	Up	0.295776	0.2936	1.2485	8	6	14	0			No	0.910775	1	Not significant
HML0757	PI 20:3-22:5	PI	Down	0.295776	0.2936	0.8478	0	5	5	12			No	0.910775	0.958689	Not significant
HML0206	PE 16:1-18:4	PE	Down	0.295776	0.2936	0.9984	0	1	1	19			No	0.910775	0.688936	Not significant
HML0393	PG 18:3-20:0	PG	Up	0.295776	0.2936	1.0443	9	3	12	2			No	0.910775	0.873333	Not significant
HML0377	PG 18:1-22:2	PG	Up	0.295776	0.2936	1.1211	8	5	13	1			No	0.910775	0.873333	Not significant
HML0561	PG 22:4-22:5	PG	Up	0.295776	0.2936	1.0108	1	0	1	18			No	0.910775	0.873333	Not significant
HML1215	TAG52:4-FA20:4	Other	Up	0.295776	0.2936	1.3184	9	5	14	0			No	0.910775	1	Not significant
HML0618	PS 22:4-22:6	PS	Up	0.295776	0.2936	1.2425	4	1	5	10			No	0.910775	0.708488	Not significant
HML0622	PI 16:0-18:3	PI	Down	0.295776	0.2936	0.8469	5	8	13	1			No	0.910775	0.958689	Not significant
HML0647	PI 16:1-22:5	PI	Down	0.295776	0.2936	0.8345	0	1	1	20			No	0.910775	0.958689	Not significant
HML0964	SM 44:0	SM	Down	0.295776	0.2936	0.9978	0	1	1	23			No	0.910775	0.417311	Not significant
HML1279	TAG54:4-FA16:0	Other	—	0.295776	0.2936	1.1514	7	7	14	0			No	0.910775	1	Not significant
HML0196	PE 16:0-18:4	PE	Down	0.295776	0.2936	0.9718	0	1	1	20			No	0.910775	0.688936	Not significant
HML0253	PE 18:3-20:4	PE	Down	0.295776	0.2936	0.9807	2	3	5	13			No	0.910775	0.688936	Not significant
HML0728	PI 20:1-20:3	PI	—	0.295776	0.2936	1.041	3	3	6	9			No	0.910775	0.958689	Not significant
HML0741	PI 20:2-20:5	PI	Down	0.295776	0.2936	0.9322	2	4	6	12			No	0.910775	0.958689	Not significant
HML0920	SM 36:1	SM	Up	0.295776	0.2936	1.0512	9	5	14	0			No	0.910775	0.417311	Not significant
HML0027	DAG 20:0-20:4	DG	Up	0.295776	0.2936	1.1526	2	1	3	14			No	0.910775	0.799547	Not significant
HML1369	TAG56:6-FA22:4	Other	Up	0.295776	0.2936	1.3392	9	5	14	0			No	0.910775	1	Not significant
HMDB0009786	PI 16:0-20:2	PI	—	0.295776	0.2936	1.0984	2	2	4	14			No	0.910775	0.958689	Not significant
HMDB0009819	PI 18:0-22:5	PI	Down	0.295776	0.2936	0.9247	3	5	8	7			No	0.910775	0.958689	Not significant
HMDB0007197	DAG 18:1-20:3	DG	Up	0.295776	0.2936	1.2245	8	6	14	0			No	0.910775	0.799547	Not significant
HML1415	TAG58:7-FA20:4	Other	Up	0.295776	0.2936	1.3522	8	6	14	0			No	0.910775	1	Not significant
HML1147	TAG50:5-FA20:5	Other	Down	0.295776	0.2936	0.5333	0	2	2	16			No	0.910775	1	Not significant
HML0803	PS 18:0-20:0	PS	Up	0.295776	0.2936	1.3234	8	6	14	0			No	0.910775	0.708488	Not significant
HML1169	TAG51:4-FA16:1	Other	Up	0.295776	0.2936	1.5049	10	4	14	0			No	0.910775	1	Not significant
HML0673	PI 18:2-18:3	PI	—	0.295776	0.2936	0.9469	2	2	4	12			No	0.910775	0.958689	Not significant
HML0678	PI 18:2-22:1	PI	Down	0.295776	0.2936	0.6979	0	1	1	19			No	0.910775	0.958689	Not significant
HML0950	SM 42:0	SM	Up	0.295776	0.2936	1.4043	6	5	11	5			No	0.910775	0.417311	Not significant
HML0957	SM 43:0	SM	Up	0.300171	0.2769	1.0248	8	6	14	0			No	0.910775	0.417311	Not significant
HMDB0011470	LPE 14:0	LPE	Up	0.300171	0.2769	1.0207	8	6	14	0			No	0.910775	0.800455	Not significant
HML0645	PI 16:1-22:3	PI	Down	0.300171	0.2769	0.9836	2	4	6	13			No	0.910775	0.958689	Not significant
HML0247	PE 18:3-18:3	PE	—	0.307821	0.2726	1	0	0	2	16			No	0.910775	0.688936	Not significant
HML0215	PE 16:1-22:2	PE	—	0.307821	0.2726	1	1	1	4	11			No	0.910775	0.688936	Not significant
HML0747	PI 20:2-22:5	PI	Down	0.325806	0.2768	0.9916	3	4	7	8			No	0.910775	0.958689	Not significant
HML0028	DAG 20:0-20:5	DG	Down	0.325806	0.2768	0.8111	5	6	11	3			No	0.910775	0.799547	Not significant
HML0734	PI 20:1-22:3	PI	—	0.325806	0.2768	1.073	1	1	2	20			No	0.910775	0.958689	Not significant
HML0255	PE 18:3-22:0	PE	Up	0.325806	0.2768	1.0024	1	0	1	18			No	0.910775	0.688936	Not significant
HML1065	TAG48:3-FA14:0	Other	Up	0.325806	0.2768	1.5824	11	3	14	0			No	0.910775	1	Not significant
HML0251	PE 18:3-20:2	PE	—	0.325806	0.2768	1.0025	2	2	4	12			No	0.910775	0.688936	Not significant
HML0358	PG 18:0-18:0	PG	Up	0.325806	0.2768	1.0645	2	0	2	16			No	0.910775	0.873333	Not significant
HML1052	TAG48:1-FA16:0	Other	Up	0.325806	0.2768	1.2505	8	6	14	0			No	0.910775	1	Not significant
HML1221	TAG52:5-FA18:1	Other	Up	0.325806	0.2768	1.1589	9	5	14	0			No	0.910775	1	Not significant
HML0325	PE 20:5-22:1	PE	Down	0.325806	0.2768	0.9908	0	3	3	16			No	0.910775	0.688936	Not significant
HML0625	PI 16:0-20:1	PI	—	0.325806	0.2768	1.1318	1	1	2	16			No	0.910775	0.958689	Not significant
HML1053	TAG48:1-FA16:1	Other	Up	0.325806	0.2768	1.2637	9	5	14	0			No	0.910775	1	Not significant
HML1037	TAG47:1-FA16:0	Other	Up	0.325806	0.2768	1.2662	8	6	14	0			No	0.910775	1	Not significant
HML0242	PE 18:2-22:0	PE	—	0.325806	0.2768	1.0011	5	5	10	4			No	0.910775	0.688936	Not significant
HML1068	TAG48:3-FA16:1	Other	Up	0.325806	0.2768	1.3637	9	5	14	0			No	0.910775	1	Not significant
HML1060	TAG48:2-FA16:1	Other	Up	0.325806	0.2768	1.3604	9	5	14	0			No	0.910775	1	Not significant
HML1009	TAG46:1-FA14:0	Other	Up	0.325806	0.2768	1.6343	8	6	14	0			No	0.910775	1	Not significant
HML0947	SM 41:2	SM	Up	0.325806	0.2768	1.1058	9	5	14	0			No	0.910775	0.442165	Not significant
HML0267	PE 18:4-20:4	PE	Up	0.325806	0.2768	1.0049	1	0	1	22			No	0.910775	0.688936	Not significant
HML0287	PE 20:0-22:6	PE	Up	0.325806	0.2768	1.0207	1	0	1	17			No	0.910775	0.688936	Not significant
HML0032	DAG 20:0-22:3	DG	Down	0.325806	0.2768	0.6839	4	9	13	1			No	0.910775	0.799547	Not significant
HML0386	PG 18:2-22:0	PG	Up	0.325806	0.2768	1.2081	9	5	14	0			No	0.910775	0.873333	Not significant
HML0409	PG 18:4-20:2	PG	—	0.325806	0.2768		0	0	0	25			No	0.910775	0.873333	Not significant
HML0404	PG 18:3-22:5	PG	—	0.325806	0.2768	0.9904	1	1	2	20			No	0.910775	0.873333	Not significant
HML1146	TAG50:5-FA20:4	Other	Up	0.325806	0.2768	2.1377	10	4	14	0			No	0.910775	1	Not significant
HML1122	TAG50:3-FA14:0	Other	Up	0.325806	0.2768	1.5261	10	4	14	0			No	0.910775	1	Not significant
HML1394	TAG56:9-FA20:4	Other	Up	0.325806	0.2768	1.161	10	4	14	0			No	0.910775	1	Not significant
HML0666	PI 18:1-22:0	PI	Up	0.325806	0.2768	1.2951	1	0	1	21			No	0.910775	0.958689	Not significant
HML1375	TAG56:7-FA18:1	Other	Up	0.325806	0.2768	1.2741	9	5	14	0			No	0.910775	1	Not significant
HMDB0009794	PI 16:0-22:4	PI	Up	0.325806	0.2768	1.0444	1	0	1	17			No	0.910775	0.958689	Not significant
HML1357	TAG56:5-FA20:4	Other	Up	0.325806	0.2768	1.2257	9	5	14	0			No	0.910775	1	Not significant
HML1358	TAG56:5-FA22:4	Other	Up	0.325806	0.2768	1.1599	9	5	14	0			No	0.910775	1	Not significant
HMDB0007030	DAG 18:1-18:1	DG	Up	0.325806	0.2768	1.1718	9	5	14	0			No	0.910775	0.799547	Not significant
HML0373	PG 18:1-20:4	PG	Down	0.325806	0.2768	0.9945	0	1	1	18			No	0.910775	0.873333	Not significant
HML1117	TAG50:2-FA16:1	Other	Up	0.325806	0.2768	1.1617	9	5	14	0			No	0.910775	1	Not significant
HML0521	PE 22:1-22:5	PE	—	0.325806	0.2768		0	0	0	21			No	0.910775	0.688936	Not significant
HML0263	PE 18:4-20:0	PE	—	0.328065	0.2614	1	1	1	5	11			No	0.915011	0.688936	Not significant
HML0432	PG 20:0-22:6	PG	Up	0.357544	0.2601	1.0181	3	0	3	13			No	0.921969	0.873333	Not significant
HML0016	DAG 16:1-18:1	DG	—	0.357544	0.2601	1.0349	7	7	14	0			No	0.921969	0.799547	Not significant
HML1050	TAG48:1-FA14:0	Other	Up	0.357544	0.2601	1.2884	9	5	14	0			No	0.921969	1	Not significant
HML0969	SM 44:5	SM	Down	0.357544	0.2601	0.9351	5	9	14	0			No	0.921969	0.463182	Not significant
HML1292	TAG54:5-FA16:1	Other	Up	0.357544	0.2601	1.0468	8	6	14	0			No	0.921969	1	Not significant
HML1214	TAG52:4-FA20:3	Other	Up	0.357544	0.2601	1.2936	8	6	14	0			No	0.921969	1	Not significant
HML1019	TAG46:2-FA16:1	Other	Up	0.357544	0.2601	1.6619	8	6	14	0			No	0.921969	1	Not significant
HML0320	PE 20:4-22:3	PE	Down	0.357544	0.2601	0.9582	5	9	14	0			No	0.921969	0.719986	Not significant
HML1012	TAG46:1-FA16:1	Other	Up	0.357544	0.2601	1.3984	9	5	14	0			No	0.921969	1	Not significant
HML1299	TAG54:5-FA20:4	Other	Up	0.357544	0.2601	1.1511	9	5	14	0			No	0.921969	1	Not significant
HML1096	TAG49:2-FA16:1	Other	Up	0.357544	0.2601	1.1693	9	5	14	0			No	0.921969	1	Not significant
HML1016	TAG46:2-FA14:0	Other	Up	0.357544	0.2601	1.8319	10	4	14	0			No	0.921969	1	Not significant
HML0775	PI 20:5-22:6	PI	Up	0.357544	0.2601	1.029	1	0	1	24			No	0.921969	0.958689	Not significant
HMDB0012382	PS 18:0-20:3	PS	Up	0.357544	0.2601	1.2769	6	5	11	3			No	0.921969	0.805442	Not significant
HML0773	PI 20:5-22:4	PI	Up	0.357544	0.2601	1.0481	4	2	6	11			No	0.921969	0.958689	Not significant
HML1407	TAG58:6-FA18:1	Other	—	0.357544	0.2601	1.1745	7	7	14	0			No	0.921969	1	Not significant
HML1393	TAG56:9-FA18:3	Other	Up	0.357544	0.2601	1.3659	8	5	13	1			No	0.921969	1	Not significant
HMDB0009791	PI 16:0-22:2	PI	Up	0.357544	0.2601	1.2535	3	2	5	11			No	0.921969	0.958689	Not significant
HML1352	TAG56:5-FA18:1	Other	Up	0.357544	0.2601	1.1517	8	6	14	0			No	0.921969	1	Not significant
HML0270	PE 18:4-22:1	PE	Down	0.357544	0.2601	0.9927	1	2	3	13			No	0.921969	0.719986	Not significant
HMDB0010400	LPC 22:2	LPC	Up	0.357544	0.2601	1.0056	8	6	14	0			No	0.921969	0.476725	Not significant
HML1290	TAG54:4-FA22:4	Other	Up	0.357544	0.2601	1.2481	9	5	14	0			No	0.921969	1	Not significant
HML1073	TAG48:4-FA14:0	Other	Up	0.357544	0.2601	1.3205	10	4	14	0			No	0.921969	1	Not significant
HML1227	TAG52:5-FA22:5	Other	Up	0.357544	0.2601	1.2535	9	5	14	0			No	0.921969	1	Not significant
HML1230	TAG52:6-FA16:1	Other	Up	0.357544	0.2601	1.1453	9	5	14	0			No	0.921969	1	Not significant
HML0568	PI 22:0-22:2	PI	Down	0.357544	0.2601	0.9517	0	1	1	14			No	0.921969	0.958689	Not significant
HML1057	TAG48:2-FA14:0	Other	Up	0.357544	0.2601	1.4876	10	4	14	0			No	0.921969	1	Not significant
HML0937	SM 39:5	SM	Up	0.357544	0.2601	1.0465	8	6	14	0			No	0.921969	0.463182	Not significant
HML1193	TAG52:3-FA14:0	Other	Up	0.357544	0.2601	1.3256	9	5	14	0			No	0.921969	1	Not significant
HML0044	DAG 20:1-22:4	DG	Up	0.357544	0.2601	1.033	8	5	13	1			No	0.921969	0.799547	Not significant
HMDB0012390	PS 18:1-18:1	PS	Down	0.357544	0.2601	0.8679	1	4	5	11			No	0.921969	0.805442	Not significant
HMDB0010651	PG 18:2-18:3	PG	Up	0.357544	0.2601	1.0654	7	6	13	1			No	0.921969	0.873333	Not significant
HMDB0009102	PE 18:2-20:4	PE	Up	0.357544	0.2601	1.0791	8	6	14	0			No	0.921969	0.719986	Not significant
HML0479	PG 20:5-22:4	PG	Down	0.357544	0.2601	0.9831	2	3	5	14			No	0.921969	0.873333	Not significant
HML1127	TAG50:3-FA18:1	Other	Up	0.357544	0.2601	1.2203	9	5	14	0			No	0.921969	1	Not significant
HML0025	DAG 20:0-20:2	DG	Down	0.357544	0.2601	0.6125	4	9	13	1			No	0.921969	0.799547	Not significant
HMDB0007099	DAG 16:0-16:1	DG	Up	0.390991	0.2433	1.1461	8	6	14	0			No	0.924712	0.799547	Not significant
HML1184	TAG52:2-FA14:0	Other	Up	0.390991	0.2433	1.0884	9	5	14	0			No	0.924712	1	Not significant
HML0039	DAG 20:1-20:4	DG	—	0.390991	0.2433	0.9273	2	2	4	13			No	0.924712	0.799547	Not significant
HML1202	TAG52:3-FA20:2	Other	Up	0.390991	0.2433	1.0338	9	5	14	0			No	0.924712	1	Not significant
HML1062	TAG48:2-FA18:1	Other	Up	0.390991	0.2433	1.3901	8	6	14	0			No	0.924712	1	Not significant
HMDB0005780	PE 16:0-22:6	PE	Up	0.390991	0.2433	1.1422	9	5	14	0			No	0.924712	0.727541	Not significant
HML1409	TAG58:6-FA22:4	Other	Up	0.390991	0.2433	1.3787	8	6	14	0			No	0.924712	1	Not significant
HML0867	PS 20:0-22:5	PS	—	0.390991	0.2433		0	0	0	25			No	0.924712	0.805442	Not significant
HML1159	TAG51:2-FA16:1	Other	Up	0.390991	0.2433	1.2556	9	5	14	0			No	0.924712	1	Not significant
HMDB0010611	PG 18:0-22:4	PG	Up	0.390991	0.2433	1.0163	3	2	5	11			No	0.924712	0.873333	Not significant
HML0296	PE 20:1-22:4	PE	Down	0.390991	0.2433	0.9864	1	4	5	13			No	0.924712	0.727541	Not significant
HML1011	TAG46:1-FA16:0	Other	Up	0.390991	0.2433	1.4239	9	5	14	0			No	0.924712	1	Not significant
HML0580	PI 22:2-22:3	PI	Up	0.390991	0.2433	1.0405	3	1	4	16			No	0.924712	0.958689	Not significant
HML1207	TAG52:4-FA16:1	Other	Up	0.390991	0.2433	1.1819	8	6	14	0			No	0.924712	1	Not significant
HML0295	PE 20:1-22:3	PE	Up	0.390991	0.2433	1.0152	1	0	1	15			No	0.924712	0.727541	Not significant
HML0333	PG 16:0-20:1	PG	Down	0.390991	0.2433	0.972	1	2	3	18			No	0.924712	0.873333	Not significant
HML0234	PE 18:1-20:4	PE	Up	0.390991	0.2433	1.1032	9	5	14	0			No	0.924712	0.727541	Not significant
HML0744	PI 20:2-22:2	PI	Up	0.390991	0.2433	1.1643	1	0	1	20			No	0.924712	0.958689	Not significant
HML0684	PI 18:3-18:3	PI	Up	0.390991	0.2433	1.1257	3	0	3	14			No	0.924712	0.958689	Not significant
HML0961	SM 43:4	SM	—	0.390991	0.2433	1.0199	7	7	14	0			No	0.924712	0.484489	Not significant
HML0389	PG 18:2-22:3	PG	—	0.390991	0.2433		0	0	0	18			No	0.924712	0.873333	Not significant
HML1231	TAG52:6-FA18:1	Other	Up	0.390991	0.2433	1.1362	8	5	13	1			No	0.924712	1	Not significant
HML1213	TAG52:4-FA20:2	Other	Up	0.390991	0.2433	1.3685	8	6	14	0			No	0.924712	1	Not significant
HML1175	TAG52:0-FA16:0	Other	Up	0.390991	0.2433	2.7234	2	0	2	19			No	0.924712	1	Not significant
HML0770	PI 20:5-22:1	PI	Up	0.390991	0.2433	1.1496	6	2	8	6			No	0.924712	0.958689	Not significant
HML0796	PS 16:1-22:4	PS	Up	0.390991	0.2433	1.1201	5	3	8	6			No	0.924712	0.805442	Not significant
HML0799	PS 18:0-18:0	PS	Up	0.390991	0.2433	1.191	9	5	14	0			No	0.924712	0.805442	Not significant
HML0475	PG 20:5-22:0	PG	Down	0.390991	0.2433	0.9963	0	1	1	22			No	0.924712	0.873333	Not significant
HML0547	PG 22:1-22:3	PG	—	0.390991	0.2433		0	0	0	24			No	0.924712	0.873333	Not significant
HMDB0012391	PS 18:1-18:2	PS	Down	0.390991	0.2433	0.6542	1	5	6	13			No	0.924712	0.805442	Not significant
HML0536	PE 22:5-22:6	PE	Up	0.390991	0.2433	1.072	10	2	12	2			No	0.924712	0.727541	Not significant
HML0397	PG 18:3-20:4	PG	Up	0.390991	0.2433	1.0018	2	0	2	15			No	0.924712	0.873333	Not significant
HML0522	PE 22:1-22:6	PE	Up	0.390991	0.2433	1.0016	1	0	1	19			No	0.924712	0.727541	Not significant
HMDB0012402	PS 18:2-18:2	PS	Down	0.390991	0.2433	0.7687	3	9	12	2			No	0.924712	0.805442	Not significant
HML0951	SM 42:1	SM	—	0.390991	0.2433	1.0475	7	7	14	0			No	0.924712	0.484489	Not significant
HML0652	PI 18:0-18:4	PI	—	0.390991	0.2433		0	0	0	20			No	0.924712	0.958689	Not significant
HMDB0009814	PI 18:0-20:3	PI	Up	0.390991	0.2433	2.7988	1	0	1	20			No	0.924712	0.958689	Not significant
HML0668	PI 18:1-22:2	PI	—	0.390991	0.2433		0	0	0	22			No	0.924712	0.958689	Not significant
HML0677	PI 18:2-22:0	PI	Down	0.390991	0.2433	0.8803	0	1	1	20			No	0.924712	0.958689	Not significant
HML0758	PI 20:3-22:6	PI	Down	0.414331	0.2182	0.9578	4	6	10	7			No	0.924712	0.958689	Not significant
HML0476	PG 20:5-22:1	PG	—	0.421579	0.2148	1	0	0	1	16			No	0.924712	0.873333	Not significant
HML0551	PG 22:2-22:2	PG	—	0.421579	0.2148	1	0	0	1	19			No	0.924712	0.873333	Not significant
HMDB0010575	PG 16:0-18:2	PG	Up	0.42627	0.2265	1.1745	9	4	13	1			No	0.924712	0.873333	Not significant
HML1395	TAG56:9-FA20:5	Other	Up	0.42627	0.2265	1.0232	3	2	5	13			No	0.924712	1	Not significant
HML1396	TAG56:9-FA22:6	Other	Up	0.42627	0.2265	1.2798	8	6	14	0			No	0.924712	1	Not significant
HML1342	TAG56:4-FA18:0	Other	Up	0.42627	0.2265	1.2622	9	5	14	0			No	0.924712	1	Not significant
HML0896	PS 20:3-22:4	PS	Up	0.42627	0.2265	1.1948	7	5	12	2			No	0.924712	0.81307	Not significant
HML0822	PS 18:2-22:0	PS	Up	0.42627	0.2265	1.0576	9	5	14	0			No	0.924712	0.81307	Not significant
HML1166	TAG51:3-FA18:2	Other	Up	0.42627	0.2265	1.2092	9	5	14	0			No	0.924712	1	Not significant
HML1355	TAG56:5-FA20:2	Other	Down	0.42627	0.2265	0.8074	5	9	14	0			No	0.924712	1	Not significant
HML1164	TAG51:3-FA16:1	Other	Up	0.42627	0.2265	1.4193	9	5	14	0			No	0.924712	1	Not significant
HML1139	TAG50:4-FA20:4	Other	Up	0.42627	0.2265	2.2361	9	4	13	1			No	0.924712	1	Not significant
HML0952	SM 42:2	SM	Up	0.42627	0.2265	1.0329	8	6	14	0			No	0.924712	0.495865	Not significant
HML1390	TAG56:8-FA20:5	Other	Up	0.42627	0.2265	1.0837	9	5	14	0			No	0.924712	1	Not significant
HML1388	TAG56:8-FA18:3	Other	Up	0.42627	0.2265	1.5821	9	5	14	0			No	0.924712	1	Not significant
HML1368	TAG56:6-FA20:5	Other	Up	0.42627	0.2265	1.0343	8	6	14	0			No	0.924712	1	Not significant
HML1376	TAG56:7-FA18:2	Other	Up	0.42627	0.2265	1.2358	8	6	14	0			No	0.924712	1	Not significant
HML0446	PG 20:2-20:3	PG	—	0.42627	0.2265		0	0	0	21			No	0.924712	0.873333	Not significant
HML0662	PI 18:1-20:1	PI	Down	0.42627	0.2265	0.7381	0	2	2	17			No	0.924712	0.958689	Not significant
HML0989	TAG44:1-FA16:1	Other	Up	0.42627	0.2265	1.4372	9	5	14	0			No	0.924712	1	Not significant
HML0615	PS 22:3-22:6	PS	Up	0.42627	0.2265	1.0414	4	2	6	8			No	0.924712	0.81307	Not significant
HML0299	PE 20:2-20:2	PE	Down	0.42627	0.2265	0.9951	0	1	1	19			No	0.924712	0.7736	Not significant
HML0921	SM 36:2	SM	Up	0.42627	0.2265	1.0868	9	5	14	0			No	0.924712	0.495865	Not significant
HML0702	PI 18:4-20:2	PI	Up	0.42627	0.2265	1.274	1	0	1	19			No	0.924712	0.958689	Not significant
HML1287	TAG54:4-FA20:3	Other	—	0.42627	0.2265	1.0143	7	7	14	0			No	0.924712	1	Not significant
HML0202	PE 16:1-16:1	PE	Down	0.42627	0.2265	0.9968	2	3	5	10			No	0.924712	0.7736	Not significant
HML0374	PG 18:1-20:5	PG	Up	0.42627	0.2265	1.0009	1	0	1	17			No	0.924712	0.873333	Not significant
HML0332	PG 16:0-20:0	PG	Up	0.42627	0.2265	1.126	8	3	11	3			No	0.924712	0.873333	Not significant
HML0340	PG 16:1-18:1	PG	Down	0.42627	0.2265	0.9895	0	2	2	17			No	0.924712	0.873333	Not significant
HML0360	PG 18:0-18:3	PG	Down	0.42627	0.2265	0.9703	0	2	2	18			No	0.924712	0.873333	Not significant
HML1026	TAG46:3-FA16:1	Other	Up	0.42627	0.2265	1.4444	9	5	14	0			No	0.924712	1	Not significant
HML0619	PS 22:5-22:5	PS	Up	0.42627	0.2265	3.0115	1	0	1	23			No	0.924712	0.81307	Not significant
HML0643	PI 16:1-22:1	PI	—	0.42627	0.2265	0.7854	1	1	2	15			No	0.924712	0.958689	Not significant
HML1220	TAG52:5-FA16:1	Other	Up	0.42627	0.2265	1.0936	9	5	14	0			No	0.924712	1	Not significant
HML0959	SM 43:2	SM	Up	0.42627	0.2265	1.1505	9	5	14	0			No	0.924712	0.495865	Not significant
HML0717	PI 20:0-20:4	PI	—	0.42627	0.2265	0.9814	2	2	4	15			No	0.924712	0.958689	Not significant
HML0730	PI 20:1-20:5	PI	Up	0.42627	0.2265	1.6982	2	1	3	14			No	0.924712	0.958689	Not significant
HML1310	TAG54:6-FA20:4	Other	Up	0.42627	0.2265	1.1924	9	5	14	0			No	0.924712	1	Not significant
HML0385	PG 18:2-20:5	PG	—	0.42627	0.2265	0.9982	1	1	2	19			No	0.924712	0.873333	Not significant
HML1333	TAG56:2-FA20:1	Other	Down	0.42627	0.2265	0.7615	5	9	14	0			No	0.924712	1	Not significant
HML0048	LPC 19:0	LPC	Up	0.42627	0.2265	1.1351	8	6	14	0			No	0.924712	0.538446	Not significant
HML0053	LPE 17:1	LPE	Up	0.42627	0.2265	1.1032	9	5	14	0			No	0.924712	0.926007	Not significant
HML0424	PG 20:0-20:4	PG	—	0.42627	0.2265		0	0	0	23			No	0.924712	0.873333	Not significant
HML1098	TAG49:2-FA18:1	Other	Up	0.42627	0.2265	1.2753	8	6	14	0			No	0.924712	1	Not significant
HML1095	TAG49:2-FA16:0	Other	Up	0.42627	0.2265	1.16	10	4	14	0			No	0.924712	1	Not significant
HML0005	Cer d18:1/16:1	Cer	Up	0.42627	0.2265	1.2213	2	0	2	15			No	0.924712	0.75791	Not significant
HML1304	TAG54:6-FA16:0	Other	Up	0.42627	0.2265	1.1063	8	6	14	0			No	0.924712	1	Not significant
HML0540	PG 22:0-22:2	PG	Up	0.42627	0.2265	1.0018	1	0	1	23			No	0.924712	0.873333	Not significant
HML1090	TAG49:1-FA16:1	Other	Up	0.42627	0.2265	1.0975	9	5	14	0			No	0.924712	1	Not significant
HML0414	PG 18:4-22:1	PG	Up	0.42627	0.2265	1.0138	2	1	3	18			No	0.924712	0.873333	Not significant
HML1186	TAG52:2-FA16:1	Other	—	0.463135	0.2097	1.6643	7	7	14	0			No	0.946272	1	Not significant
HML1059	TAG48:2-FA16:0	Other	Up	0.463135	0.2097	1.3807	9	5	14	0			No	0.946272	1	Not significant
HML0632	PI 16:1-18:1	PI	—	0.463135	0.2097	0.9863	7	7	14	0			No	0.946272	0.958689	Not significant
HML1022	TAG46:3-FA12:0	Other	Up	0.463135	0.2097	1.4619	8	5	13	1			No	0.946272	1	Not significant
HML0311	PE 20:3-22:2	PE	Up	0.463135	0.2097	1.1196	2	0	2	13			No	0.946272	0.800951	Not significant
HML0305	PE 20:2-22:4	PE	—	0.463135	0.2097		0	0	0	26			No	0.946272	0.800951	Not significant
HML1386	TAG56:8-FA18:1	Other	Up	0.463135	0.2097	1.0867	9	5	14	0			No	0.946272	1	Not significant
HML1367	TAG56:6-FA20:4	Other	Up	0.463135	0.2097	1.2472	9	5	14	0			No	0.946272	1	Not significant
HML1334	TAG56:3-FA16:0	Other	Up	0.463135	0.2097	1.0753	9	5	14	0			No	0.946272	1	Not significant
HML0020	DAG 18:0-18:4	DG	Up	0.463135	0.2097	1.2707	3	2	5	11			No	0.946272	0.799547	Not significant
HML1170	TAG51:4-FA18:2	Other	Up	0.463135	0.2097	1.1377	9	5	14	0			No	0.946272	1	Not significant
HML0387	PG 18:2-22:1	PG	Up	0.463135	0.2097	1.3029	8	6	14	0			No	0.946272	0.894329	Not significant
HML0197	PE 16:0-20:0	PE	Up	0.463135	0.2097	1.0439	3	2	5	12			No	0.946272	0.800951	Not significant
HML0399	PG 18:3-22:0	PG	Down	0.463135	0.2097	0.9028	6	8	14	0			No	0.946272	0.894329	Not significant
HML1313	TAG54:6-FA22:6	Other	Up	0.463135	0.2097	1.068	9	5	14	0			No	0.946272	1	Not significant
HML0729	PI 20:1-20:4	PI	—	0.463135	0.2097	1.009	3	3	6	10			No	0.946272	0.958689	Not significant
HML1086	TAG49:0-FA18:0	Other	Up	0.463135	0.2097	1.1172	8	5	13	1			No	0.946272	1	Not significant
HML1128	TAG50:3-FA18:2	Other	—	0.463135	0.2097	1.0906	7	7	14	0			No	0.946272	1	Not significant
HML1119	TAG50:2-FA18:1	Other	Up	0.463135	0.2097	1.1049	9	5	14	0			No	0.946272	1	Not significant
HMDB0011494	LPE 22:5	LPE	—	0.463135	0.2097	0.9759	7	7	14	0			No	0.946272	0.926007	Not significant
HML0460	PG 20:3-22:1	PG	Up	0.463135	0.2097	1.0257	2	0	2	16			No	0.946272	0.894329	Not significant
HML1110	TAG50:1-FA16:1	Other	—	0.463135	0.2097		0	0	0	25			No	0.946272	1	Not significant
HML1363	TAG56:6-FA18:2	Other	Up	0.463135	0.2097	1.0587	9	5	14	0			No	0.946272	1	Not significant
HML0541	PG 22:0-22:3	PG	—	0.463135	0.2097		0	0	0	22			No	0.946272	0.894329	Not significant
HML0903	PS 20:4-22:3	PS	Down	0.463135	0.2097	0.8758	2	4	6	10			No	0.946272	0.822463	Not significant
HML0902	PS 20:4-22:2	PS	Up	0.463135	0.2097	1.0107	8	6	14	0			No	0.946272	0.822463	Not significant
HML1356	TAG56:5-FA20:3	Other	Up	0.463135	0.2097	1.0953	8	6	14	0			No	0.946272	1	Not significant
HML1158	TAG51:2-FA16:0	Other	Up	0.463135	0.2097	1.1379	8	6	14	0			No	0.946272	1	Not significant
HMDB0010650	PG 18:2-18:2	PG	—	0.463135	0.2097	1.0547	7	7	14	0			No	0.946272	0.894329	Not significant
HMDB0008994	PE 18:0-18:2	PE	Up	0.463135	0.2097	1.1249	8	6	14	0			No	0.946272	0.800951	Not significant
HMDB0007098	DAG 16:0-16:0	DG	Up	0.463135	0.2097	1.0791	8	6	14	0			No	0.946272	0.799547	Not significant
HML1431	TAG60:10-FA22:6	Other	Down	0.463135	0.2097	0.76	5	6	11	3			No	0.946272	1	Not significant
HML1340	TAG56:3-FA20:2	Other	Down	0.463135	0.2097	0.857	5	9	14	0			No	0.946272	1	Not significant
HML0897	PS 20:3-22:5	PS	Up	0.463135	0.2097	1.1481	9	5	14	0			No	0.946272	0.822463	Not significant
HML0811	PS 18:1-20:0	PS	—	0.463135	0.2097	0.9768	7	7	14	0			No	0.946272	0.822463	Not significant
HML0670	PI 18:1-22:4	PI	Down	0.470228	0.193	0.9314	2	3	5	12			No	0.953558	0.958689	Not significant
HML0731	PI 20:1-22:0	PI	Down	0.501587	0.1929	0.9794	0	1	1	26			No	0.953558	0.958689	Not significant
HML1036	TAG47:1-FA15:0	Other	Up	0.501587	0.1929	1.3453	7	6	13	1			No	0.953558	1	Not significant
HML1331	TAG56:2-FA18:0	Other	—	0.501587	0.1929	0.9422	7	7	14	0			No	0.953558	1	Not significant
HML0042	DAG 20:1-22:2	DG	—	0.501587	0.1929	1.0577	2	2	4	16			No	0.953558	0.799547	Not significant
HML0381	PG 18:2-18:4	PG	Up	0.501587	0.1929	1.0763	4	1	5	12			No	0.953558	0.926007	Not significant
HML1055	TAG48:1-FA18:1	Other	Up	0.501587	0.1929	1.2281	9	5	14	0			No	0.953558	1	Not significant
HML0328	PE 20:5-22:4	PE	—	0.501587	0.1929		0	0	0	23			No	0.953558	0.836984	Not significant
HML1233	TAG52:6-FA18:3	Other	Up	0.501587	0.1929	1.1504	8	6	14	0			No	0.953558	1	Not significant
HML1104	TAG49:3-FA18:3	Other	Up	0.501587	0.1929	1.0652	7	4	11	4			No	0.953558	1	Not significant
HML0708	PI 18:4-22:2	PI	Up	0.501587	0.1929	1.0453	5	3	8	8			No	0.953558	0.958689	Not significant
HML0917	SM 35:0	SM	—	0.501587	0.1929	1.0097	7	7	14	0			No	0.953558	0.560597	Not significant
HML0727	PI 20:1-20:2	PI	Up	0.501587	0.1929	1.1831	2	1	3	14			No	0.953558	0.958689	Not significant
HML1195	TAG52:3-FA16:1	Other	Up	0.501587	0.1929	1.1056	8	6	14	0			No	0.953558	1	Not significant
HMDB0010659	PG 18:2-22:6	PG	Up	0.501587	0.1929	1.0024	2	1	3	14			No	0.953558	0.926007	Not significant
HML1089	TAG49:1-FA16:0	Other	Up	0.501587	0.1929	1.1457	9	5	14	0			No	0.953558	1	Not significant
HMDB0011478	LPE 18:3	LPE	Up	0.501587	0.1929	1.1558	9	5	14	0			No	0.953558	0.926007	Not significant
HML0018	DAG 18:0-18:0	DG	Up	0.501587	0.1929	1.0158	10	4	14	0			No	0.953558	0.799547	Not significant
HML0750	PI 20:3-20:4	PI	Up	0.501587	0.1929	1.8995	1	0	1	19			No	0.953558	0.958689	Not significant
HML1121	TAG50:2-FA20:2	Other	Up	0.501587	0.1929	1.4715	9	5	14	0			No	0.953558	1	Not significant
HML1116	TAG50:2-FA16:0	Other	Up	0.501587	0.1929	1.0603	8	6	14	0			No	0.953558	1	Not significant
HML0421	PG 20:0-20:1	PG	Down	0.501587	0.1929	0.9717	0	1	1	14			No	0.953558	0.926007	Not significant
HML1145	TAG50:5-FA18:3	Other	Up	0.501587	0.1929	1.3198	9	5	14	0			No	0.953558	1	Not significant
HML1366	TAG56:6-FA20:3	Other	—	0.501587	0.1929	1.0942	7	7	14	0			No	0.953558	1	Not significant
HML1080	TAG48:4-FA20:4	Other	—	0.501587	0.1929	0.9902	4	4	8	6			No	0.953558	1	Not significant
HML1076	TAG48:4-FA16:1	Other	Up	0.501587	0.1929	1.2554	9	5	14	0			No	0.953558	1	Not significant
HML1063	TAG48:2-FA18:2	Other	Up	0.501587	0.1929	1.432	9	5	14	0			No	0.953558	1	Not significant
HML0683	PI 18:2-22:6	PI	—	0.501587	0.1929		0	0	0	18			No	0.953558	0.958689	Not significant
HML0011	Cer d18:1/24:1	Cer	Up	0.501587	0.1929	1.0316	8	6	14	0			No	0.953558	0.75791	Not significant
HML0054	LPE 19:0	LPE	Up	0.501587	0.1929	1.0352	6	0	6	9			No	0.953558	0.926007	Not significant
HML0274	PE 18:4-22:6	PE	—	0.501587	0.1929		0	0	0	17			No	0.953558	0.836984	Not significant
HMDB0009818	PI 18:0-22:4	PI	—	0.501587	0.1929	1.1589	2	2	4	13			No	0.953558	0.958689	Not significant
HML0848	PS 18:4-20:5	PS	Up	0.501587	0.1929	1.0723	3	2	5	16			No	0.953558	0.845265	Not significant
HML0453	PG 20:2-22:4	PG	Up	0.501587	0.1929	1.006	5	4	9	6			No	0.953558	0.926007	Not significant
HML1348	TAG56:4-FA20:4	Other	—	0.501587	0.1929		0	0	0	27			No	0.953558	1	Not significant
HML0855	PS 18:4-22:6	PS	—	0.501587	0.1929		0	0	0	27			No	0.953558	0.845265	Not significant
HML1160	TAG51:2-FA17:0	Other	Up	0.501587	0.1929	1.0973	9	5	14	0			No	0.953558	1	Not significant
HML1163	TAG51:3-FA15:0	Other	Up	0.501587	0.1929	1.1793	8	6	14	0			No	0.953558	1	Not significant
HML0672	PI 18:1-22:6	PI	Up	0.501587	0.1929	1.0263	3	2	5	9			No	0.953558	0.958689	Not significant
HML0953	SM 42:3	SM	Up	0.501587	0.1929	1.0071	9	5	14	0			No	0.953558	0.560597	Not significant
HML0576	PI 22:1-22:4	PI	Up	0.501587	0.1929	1.3845	1	0	1	20			No	0.953558	0.958689	Not significant
HML1349	TAG56:4-FA22:4	Other	—	0.501587	0.1929		0	0	0	26			No	0.953558	1	Not significant
HML1140	TAG50:5-FA14:0	Other	Up	0.501587	0.1929	2.0675	10	4	14	0			No	0.953558	1	Not significant
HMDB0007195	DAG 18:1-20:1	DG	Up	0.501587	0.1929	1.1463	8	6	14	0			No	0.953558	0.799547	Not significant
HML1413	TAG58:7-FA18:1	Other	—	0.501587	0.1929	1.1993	7	7	14	0			No	0.953558	1	Not significant
HML0324	PE 20:5-22:0	PE	Up	0.506746	0.1774	1.0008	2	0	3	16			No	0.960396	0.836984	Not significant
HML0218	PE 16:1-22:5	PE	Up	0.506746	0.1774	1.001	7	6	14	0			No	0.960396	0.836984	Not significant
HML0292	PE 20:1-22:0	PE	Up	0.530057	0.1678	1.0008	3	2	5	12			No	0.961327	0.847011	Not significant
HML0391	PG 18:3-18:3	PG	Down	0.541626	0.1762	0.9764	0	1	1	18			No	0.961327	0.947054	Not significant
HML0692	PI 18:3-22:0	PI	—	0.541626	0.1762	0.9471	1	1	2	19			No	0.961327	0.958689	Not significant
HML0709	PI 18:4-22:3	PI	—	0.541626	0.1762	0.9256	3	3	6	10			No	0.961327	0.958689	Not significant
HML0199	PE 16:0-22:0	PE	Up	0.541626	0.1762	1.0164	3	0	3	11			No	0.961327	0.847011	Not significant
HML0738	PI 20:2-20:2	PI	—	0.541626	0.1762	0.9693	2	2	4	14			No	0.961327	0.958689	Not significant
HML1286	TAG54:4-FA20:2	Other	—	0.541626	0.1762	1.0887	7	7	14	0			No	0.961327	1	Not significant
HML1014	TAG46:1-FA18:1	Other	Up	0.541626	0.1762	1.1757	9	5	14	0			No	0.961327	1	Not significant
HML1216	TAG52:4-FA22:1	Other	Up	0.541626	0.1762	1.1663	8	6	14	0			No	0.961327	1	Not significant
HML0579	PI 22:2-22:2	PI	Down	0.541626	0.1762	0.993	1	4	5	15			No	0.961327	0.958689	Not significant
HML1278	TAG54:3-FA20:3	Other	Up	0.541626	0.1762	4.5844	1	0	1	24			No	0.961327	1	Not significant
HML0804	PS 18:0-20:1	PS	Down	0.541626	0.1762	0.8935	0	1	1	22			No	0.961327	0.845265	Not significant
HML0878	PS 20:1-22:4	PS	—	0.541626	0.1762		0	0	0	27			No	0.961327	0.845265	Not significant
HML0694	PI 18:3-22:2	PI	Up	0.541626	0.1762	1.3423	4	3	7	7			No	0.961327	0.958689	Not significant
HML1138	TAG50:4-FA20:3	Other	Up	0.541626	0.1762	1.5173	6	4	10	4			No	0.961327	1	Not significant
HML0443	PG 20:1-22:5	PG	Down	0.541626	0.1762	0.9964	1	2	3	18			No	0.961327	0.947054	Not significant
HML0908	PS 20:5-22:1	PS	—	0.541626	0.1762		0	0	0	27			No	0.961327	0.845265	Not significant
HML0888	PS 20:2-22:5	PS	Down	0.541626	0.1762	0.7871	0	1	1	23			No	0.961327	0.845265	Not significant
HMDB0007196	DAG 18:1-20:2	DG	Up	0.541626	0.1762	1.119	9	5	14	0			No	0.961327	0.799547	Not significant
HML1154	TAG51:1-FA17:0	Other	Up	0.541626	0.1762	1.1392	8	6	14	0			No	0.961327	1	Not significant
HML1383	TAG56:7-FA22:6	Other	Up	0.541626	0.1762	1.0909	8	6	14	0			No	0.961327	1	Not significant
HML1253	TAG53:4-FA20:4	Other	Up	0.541626	0.1762	1.518	9	1	10	4			No	0.961327	1	Not significant
HML0297	PE 20:1-22:5	PE	Up	0.541626	0.1762	1.0164	2	1	3	13			No	0.961327	0.847011	Not significant
HML0676	PI 18:2-20:5	PI	Up	0.541626	0.1762	1.4929	1	0	1	21			No	0.961327	0.958689	Not significant
HML0291	PE 20:1-20:4	PE	Down	0.541626	0.1762	0.9384	6	8	14	0			No	0.961327	0.847011	Not significant
HML0681	PI 18:2-22:4	PI	Up	0.541626	0.1762	1.1799	5	1	6	11			No	0.961327	0.958689	Not significant
HML0659	PI 18:0-22:3	PI	Up	0.541626	0.1762	1.005	2	1	3	16			No	0.961327	0.958689	Not significant
HML0654	PI 18:0-20:1	PI	—	0.541626	0.1762	1.1182	2	2	4	14			No	0.961327	0.958689	Not significant
HML0679	PI 18:2-22:2	PI	Up	0.541626	0.1762	1.0509	5	2	7	7			No	0.961327	0.958689	Not significant
HML0912	PS 20:5-22:5	PS	Down	0.541626	0.1762	0.8754	0	1	1	17			No	0.961327	0.845265	Not significant
HML1191	TAG52:2-FA20:1	Other	Up	0.541626	0.1762	1.1988	8	6	14	0			No	0.961327	1	Not significant
HMDB0011477	LPE 18:2	LPE	Up	0.541626	0.1762	1.2094	9	5	14	0			No	0.961327	0.928502	Not significant
HML1332	TAG56:2-FA20:0	Other	Down	0.541626	0.1762	0.8195	6	8	14	0			No	0.961327	1	Not significant
C13916	Cer d18:1/14:0	Cer	—	0.541626	0.1762	1.0122	1	1	2	20			No	0.961327	0.75791	Not significant
HMDB0009063	PE 18:2-18:3	PE	Up	0.541626	0.1762	1.0664	2	0	2	15			No	0.961327	0.847011	Not significant
HML0790	PS 16:1-20:4	PS	—	0.541626	0.1762		0	0	0	27			No	0.961327	0.845265	Not significant
HML0763	PI 20:4-22:2	PI	Up	0.541626	0.1762	1.2217	4	2	6	11			No	0.961327	0.958689	Not significant
HML1106	TAG50:0-FA16:0	Other	Up	0.541626	0.1762	2.3515	6	1	7	8			No	0.961327	1	Not significant
HML0771	PI 20:5-22:2	PI	—	0.541626	0.1762	0.9954	4	4	8	7			No	0.961327	0.958689	Not significant
HMDB0007104	DAG 16:0-18:3	DG	Down	0.541626	0.1762	0.9006	6	8	14	0			No	0.961327	0.799547	Not significant
HML1113	TAG50:1-FA20:1	Other	Up	0.541626	0.1762	1.4349	9	5	14	0			No	0.961327	1	Not significant
HML0474	PG 20:5-20:5	PG	Up	0.541626	0.1762	1.0082	1	0	1	20			No	0.961327	0.947054	Not significant
HML1400	TAG58:10-FA22:5	Other	Down	0.541626	0.1762	0.7169	5	7	12	3			No	0.961327	1	Not significant
HMDB0007021	DAG 16:0-18:1	DG	Up	0.541626	0.1762	1.0996	8	6	14	0			No	0.961327	0.799547	Not significant
HML0456	PG 20:3-20:3	PG	Up	0.552251	0.1589	1.006	7	5	13	1			No	0.962822	0.947054	Not significant
HML0273	PE 18:4-22:5	PE	Down	0.552493	0.1588	0.9944	0	3	4	13			No	0.962822	0.854911	Not significant
HML0394	PG 18:3-20:1	PG	—	0.552493	0.1588	1	0	0	1	23			No	0.962822	0.947054	Not significant
HML0518	PE 22:1-22:2	PE	—	0.571987	0.151	1	1	1	2	17			No	0.962822	0.859651	Not significant
HML0840	PS 18:3-22:5	PS	Down	0.583008	0.1594	0.9515	6	7	13	1			No	0.962822	0.870287	Not significant
HML1425	TAG58:9-FA18:1	Other	Down	0.583008	0.1594	0.8648	6	7	13	1			No	0.962822	1	Not significant
HMDB0012359	PS 16:0-18:3	PS	Up	0.583008	0.1594	1.0993	6	2	8	8			No	0.962822	0.870287	Not significant
HML1344	TAG56:4-FA18:2	Other	Down	0.583008	0.1594	0.846	5	9	14	0			No	0.962822	1	Not significant
HML0726	PI 20:1-20:1	PI	Up	0.583008	0.1594	1.0549	1	0	1	22			No	0.962822	0.958689	Not significant
HML0719	PI 20:0-22:0	PI	—	0.583008	0.1594		0	0	0	21			No	0.962822	0.958689	Not significant
HML0704	PI 18:4-20:4	PI	—	0.583008	0.1594		0	0	0	19			No	0.962822	0.958689	Not significant
HML0706	PI 18:4-22:0	PI	Up	0.583008	0.1594	1.2695	2	1	3	11			No	0.962822	0.958689	Not significant
HML0695	PI 18:3-22:3	PI	Down	0.583008	0.1594	0.9627	2	5	7	7			No	0.962822	0.958689	Not significant
HML0207	PE 16:1-20:0	PE	—	0.583008	0.1594		0	0	0	18			No	0.962822	0.859651	Not significant
HML1079	TAG48:4-FA18:3	Other	Up	0.583008	0.1594	1.5979	9	5	14	0			No	0.962822	1	Not significant
HML0542	PG 22:0-22:4	PG	Down	0.583008	0.1594	0.9706	0	2	2	21			No	0.962822	0.947054	Not significant
HML0520	PE 22:1-22:4	PE	Up	0.583008	0.1594	1.0016	1	0	1	20			No	0.962822	0.859651	Not significant
HML1201	TAG52:3-FA20:1	Other	—	0.583008	0.1594	1.0843	7	7	14	0			No	0.962822	1	Not significant
HML0395	PG 18:3-20:2	PG	—	0.583008	0.1594		0	0	0	24			No	0.962822	0.947054	Not significant
HML1209	TAG52:4-FA18:1	Other	Up	0.583008	0.1594	1.1121	8	6	14	0			No	0.962822	1	Not significant
HML0649	PI 18:0-18:0	PI	Up	0.583008	0.1594	1.2939	6	3	9	7			No	0.962822	0.958689	Not significant
HML0584	PI 22:3-22:3	PI	—	0.583008	0.1594		0	0	0	19			No	0.962822	0.958689	Not significant
HML1093	TAG49:2-FA14:0	Other	—	0.583008	0.1594	1.2394	7	7	14	0			No	0.962822	1	Not significant
HML1092	TAG49:1-FA18:1	Other	Up	0.583008	0.1594	1.0817	8	6	14	0			No	0.962822	1	Not significant
HML1257	TAG54:0-FA18:0	Other	Down	0.583008	0.1594	0.9576	4	6	10	5			No	0.962822	1	Not significant
HML1260	TAG54:1-FA18:1	Other	—	0.583008	0.1594		0	0	0	23			No	0.962822	1	Not significant
HML1069	TAG48:3-FA18:1	Other	Up	0.583008	0.1594	1.2348	8	6	14	0			No	0.962822	1	Not significant
HML0627	PI 16:0-22:0	PI	—	0.583008	0.1594		0	0	0	21			No	0.962822	0.958689	Not significant
HML0043	DAG 20:1-22:3	DG	Down	0.583008	0.1594	0.9733	3	8	11	3			No	0.962822	0.799547	Not significant
HML0052	LPE 17:0	LPE	—	0.583008	0.1594	0.9856	7	7	14	0			No	0.962822	0.932812	Not significant
HML0577	PI 22:1-22:5	PI	Up	0.583008	0.1594	1.4899	1	0	1	21			No	0.962822	0.958689	Not significant
HML1300	TAG54:5-FA20:5	Other	Up	0.583008	0.1594	2.3313	1	0	1	14			No	0.962822	1	Not significant
HML0030	DAG 20:0-22:1	DG	Down	0.583008	0.1594	0.7004	5	9	14	0			No	0.962822	0.799547	Not significant
HML0008	Cer d18:1/20:1	Cer	Up	0.583008	0.1594	1.1744	4	1	5	10			No	0.962822	0.75791	Not significant
HML0743	PI 20:2-22:1	PI	Up	0.583008	0.1594	1.3773	2	0	2	17			No	0.962822	0.958689	Not significant
HML0818	PS 18:1-22:4	PS	Up	0.583008	0.1594	1.2638	2	1	3	15			No	0.962822	0.870287	Not significant
HMDB0008926	PE 16:0-18:1	PE	Down	0.583008	0.1594	0.9548	6	8	14	0			No	0.962822	0.859651	Not significant
HMDB0007136	DAG 18:0-18:1	DG	—	0.583008	0.1594	1.0453	7	7	14	0			No	0.962822	0.799547	Not significant
HML1149	TAG51:0-FA16:0	Other	—	0.583008	0.1594		0	0	0	27			No	0.962822	1	Not significant
HML0400	PG 18:3-22:1	PG	Down	0.583008	0.1594	0.918	6	8	14	0			No	0.962822	0.947054	Not significant
HML0450	PG 20:2-22:1	PG	—	0.583008	0.1594		0	0	0	21			No	0.962822	0.947054	Not significant
HML1168	TAG51:4-FA15:0	Other	Up	0.583008	0.1594	1.0867	9	5	14	0			No	0.962822	1	Not significant
HML1153	TAG51:1-FA16:0	Other	Up	0.583008	0.1594	1.0936	8	6	14	0			No	0.962822	1	Not significant
HML0512	PE 22:0-22:2	PE	Up	0.600179	0.1401	1.0049	2	0	3	18			No	0.962822	0.859651	Not significant
HML0559	PG 22:3-22:6	PG	Down	0.600179	0.1401	0.9945	0	1	2	18			No	0.962822	0.947054	Not significant
HML0344	PG 16:1-20:0	PG	—	0.600179	0.1401	1	1	1	3	14			No	0.962822	0.947054	Not significant
HML0442	PG 20:1-22:4	PG	Up	0.625732	0.1426	1.0009	1	0	1	19			No	0.962822	0.947054	Not significant
HML1179	TAG52:1-FA16:1	Other	Up	0.625732	0.1426	1.4419	5	4	9	6			No	0.962822	1	Not significant
HML1152	TAG51:1-FA15:0	Other	Up	0.625732	0.1426	1.2777	2	0	2	17			No	0.962822	1	Not significant
HMDB0009298	PE 20:2-20:3	PE	Up	0.625732	0.1426	1.0024	1	0	1	19			No	0.962822	0.859651	Not significant
HML1297	TAG54:5-FA20:2	Other	—	0.625732	0.1426	1.0663	7	7	14	0			No	0.962822	1	Not significant
HML0986	TAG44:1-FA14:0	Other	Up	0.625732	0.1426	1.5266	8	6	14	0			No	0.962822	1	Not significant
HML0769	PI 20:5-22:0	PI	Up	0.625732	0.1426	1.1623	3	1	4	13			No	0.962822	0.958689	Not significant
HML0259	PE 18:3-22:4	PE	—	0.625732	0.1426	1.0001	1	1	2	18			No	0.962822	0.859651	Not significant
HML1419	TAG58:8-FA18:1	Other	Down	0.625732	0.1426	0.9619	6	7	13	1			No	0.962822	1	Not significant
HMDB0007025	DAG 16:1-18:3	DG	—	0.625732	0.1426	0.8291	1	1	2	16			No	0.962822	0.799547	Not significant
HML0665	PI 18:1-20:5	PI	—	0.625732	0.1426		0	0	0	24			No	0.962822	0.958689	Not significant
HML0767	PI 20:4-22:6	PI	Up	0.625732	0.1426	1.4718	2	1	3	15			No	0.962822	0.958689	Not significant
HML0021	DAG 18:1-18:2	DG	Up	0.625732	0.1426	1.1467	8	6	14	0			No	0.962822	0.799547	Not significant
HML0038	DAG 20:1-20:3	DG	Down	0.625732	0.1426	0.8922	0	2	2	13			No	0.962822	0.799547	Not significant
HML0994	TAG44:2-FA16:1	Other	—	0.625732	0.1426	1.1496	7	7	14	0			No	0.962822	1	Not significant
HML0680	PI 18:2-22:3	PI	Down	0.625732	0.1426	0.8173	0	2	2	15			No	0.962822	0.958689	Not significant
HML1040	TAG47:1-FA18:1	Other	Up	0.625732	0.1426	1.3486	9	4	13	1			No	0.962822	1	Not significant
HML1035	TAG47:1-FA14:0	Other	Up	0.625732	0.1426	1.3469	7	6	13	1			No	0.962822	1	Not significant
HML1282	TAG54:4-FA18:1	Other	—	0.625732	0.1426	0.9704	7	7	14	0			No	0.962822	1	Not significant
HML0219	PE 16:1-22:6	PE	Up	0.625732	0.1426	1.0594	4	1	5	11			No	0.962822	0.859651	Not significant
HML1064	TAG48:3-FA12:0	Other	Up	0.625732	0.1426	1.1676	8	6	14	0			No	0.962822	1	Not significant
HML1072	TAG48:4-FA12:0	Other	Up	0.625732	0.1426	1.6684	9	5	14	0			No	0.962822	1	Not significant
HML0578	PI 22:1-22:6	PI	Up	0.625732	0.1426	1.2733	2	0	2	16			No	0.962822	0.958689	Not significant
HML1283	TAG54:4-FA18:2	Other	Down	0.625732	0.1426	0.9139	5	9	14	0			No	0.962822	1	Not significant
HML1039	TAG47:1-FA17:0	Other	Up	0.625732	0.1426	1.6004	6	3	9	5			No	0.962822	1	Not significant
HML1038	TAG47:1-FA16:1	Other	Up	0.625732	0.1426	1.07	8	6	14	0			No	0.962822	1	Not significant
HML0306	PE 20:2-22:5	PE	Up	0.625732	0.1426	1.2856	2	0	2	16			No	0.962822	0.859651	Not significant
HML0550	PG 22:1-22:6	PG	Up	0.625732	0.1426	1.0212	1	0	1	17			No	0.962822	0.947054	Not significant
HML1099	TAG49:2-FA18:2	Other	Up	0.625732	0.1426	1.1418	8	6	14	0			No	0.962822	1	Not significant
HML0558	PG 22:3-22:5	PG	Up	0.625732	0.1426	1.0139	2	0	2	18			No	0.962822	0.947054	Not significant
HML0289	PE 20:1-20:2	PE	—	0.625732	0.1426	0.998	1	1	2	17			No	0.962822	0.859651	Not significant
HML0268	PE 18:4-20:5	PE	Up	0.625732	0.1426	1.0041	1	0	1	19			No	0.962822	0.859651	Not significant
HML0705	PI 18:4-20:5	PI	—	0.625732	0.1426		0	0	0	25			No	0.962822	0.958689	Not significant
HML0471	PG 20:4-22:4	PG	Up	0.625732	0.1426	1.0141	2	1	3	13			No	0.962822	0.947054	Not significant
HML1137	TAG50:4-FA18:3	Other	Up	0.625732	0.1426	1.3204	9	5	14	0			No	0.962822	1	Not significant
HML0416	PG 18:4-22:3	PG	—	0.625732	0.1426		0	0	0	22			No	0.962822	0.947054	Not significant
HML1087	TAG49:1-FA14:0	Other	Up	0.625732	0.1426	1.3146	8	6	14	0			No	0.962822	1	Not significant
HML0525	PE 22:2-22:4	PE	—	0.625732	0.1426		0	0	0	19			No	0.962822	0.859651	Not significant
HML0480	PG 20:5-22:5	PG	Up	0.625732	0.1426	1.0124	1	0	1	20			No	0.962822	0.947054	Not significant
HML0478	PG 20:5-22:3	PG	Up	0.625732	0.1426	1.0102	3	0	3	13			No	0.962822	0.947054	Not significant
HML0375	PG 18:1-22:0	PG	Up	0.625732	0.1426	1.0299	8	6	14	0			No	0.962822	0.947054	Not significant
HML1097	TAG49:2-FA17:0	Other	Up	0.625732	0.1426	1.2953	9	5	14	0			No	0.962822	1	Not significant
HML1379	TAG56:7-FA20:4	Other	Up	0.625732	0.1426	1.1789	9	5	14	0			No	0.962822	1	Not significant
HMDB0010614	PG 18:0-22:6	PG	Up	0.625732	0.1426	1.0114	1	0	1	18			No	0.962822	0.947054	Not significant
HMDB0009851	PI 18:2-20:0	PI	—	0.625732	0.1426	0.9925	2	2	4	13			No	0.962822	0.958689	Not significant
HML1378	TAG56:7-FA20:3	Other	—	0.625732	0.1426	1.2804	7	7	14	0			No	0.962822	1	Not significant
HMDB0010399	LPC 22:1	LPC	—	0.625732	0.1426	0.9927	7	7	14	0			No	0.962822	0.745924	Not significant
HMDB0010165	PS 18:0-20:4	PS	Up	0.625732	0.1426	1.1779	8	6	14	0			No	0.962822	0.897913	Not significant
HML0457	PG 20:3-20:4	PG	Up	0.649644	0.1214	1.0142	1	0	2	18			No	0.962822	0.948358	Not significant
HML0258	PE 18:3-22:3	PE	—	0.660268	0.1175	0.9984	2	2	4	15			No	0.962822	0.879112	Not significant
HML1023	TAG46:3-FA14:0	Other	Up	0.660268	0.1175	1.5444	8	4	12	2			No	0.962822	1	Not significant
HML0019	DAG 18:0-18:3	DG	Down	0.6698	0.1258	0.9338	3	4	7	9			No	0.962822	0.80202	Not significant
HML0979	TAG42:2-FA12:0	Other	Down	0.6698	0.1258	0.0647	1	3	4	12			No	0.962822	1	Not significant
HML1020	TAG46:2-FA18:1	Other	Up	0.6698	0.1258	1.1925	8	6	14	0			No	0.962822	1	Not significant
HML0995	TAG44:2-FA18:1	Other	Down	0.6698	0.1258	0.8589	5	7	12	2			No	0.962822	1	Not significant
HML0982	TAG44:0-FA14:0	Other	Up	0.6698	0.1258	1.4115	9	4	13	1			No	0.962822	1	Not significant
HML1044	TAG47:2-FA18:1	Other	Up	0.6698	0.1258	1.2728	6	4	10	4			No	0.962822	1	Not significant
HML0944	SM 40:6	SM	Down	0.6698	0.1258	0.909	5	8	13	1			No	0.962822	0.707011	Not significant
HML1034	TAG47:0-FA17:0	Other	Up	0.6698	0.1258	1.1109	6	4	10	4			No	0.962822	1	Not significant
HML0313	PE 20:3-22:4	PE	Down	0.6698	0.1258	0.9642	1	3	4	14			No	0.962822	0.879112	Not significant
HML1296	TAG54:5-FA18:3	Other	Down	0.6698	0.1258	0.9172	6	8	14	0			No	0.962822	1	Not significant
HML0860	PS 20:0-20:4	PS	Up	0.6698	0.1258	1.6877	6	1	7	9			No	0.962822	0.897913	Not significant
HML1150	TAG51:0-FA17:0	Other	—	0.6698	0.1258		0	0	0	27			No	0.962822	1	Not significant
HMDB0008935	PE 16:0-20:3	PE	Down	0.6698	0.1258	0.9946	4	5	9	5			No	0.962822	0.879112	Not significant
HML0631	PI 16:1-16:1	PI	Down	0.6698	0.1258	0.8847	1	2	3	16			No	0.962822	0.958689	Not significant
HML0422	PG 20:0-20:2	PG	Up	0.6698	0.1258	1.0125	4	1	5	11			No	0.962822	0.948358	Not significant
HML1084	TAG49:0-FA16:0	Other	Up	0.6698	0.1258	1.1983	10	4	14	0			No	0.962822	1	Not significant
HML0528	PE 22:3-22:3	PE	—	0.6698	0.1258		0	0	0	22			No	0.962822	0.879112	Not significant
HML0411	PG 18:4-20:4	PG	Up	0.6698	0.1258	1.0009	1	0	1	21			No	0.962822	0.948358	Not significant
HML0378	PG 18:1-22:3	PG	Up	0.6698	0.1258	1.0026	1	0	1	18			No	0.962822	0.948358	Not significant
HML0369	PG 18:1-18:4	PG	Up	0.6698	0.1258	1.0455	2	1	3	13			No	0.962822	0.948358	Not significant
HML1232	TAG52:6-FA18:2	Other	—	0.6698	0.1258	1.1679	7	7	14	0			No	0.962822	1	Not significant
HML0376	PG 18:1-22:1	PG	Up	0.6698	0.1258	1.214	9	5	14	0			No	0.962822	0.948358	Not significant
HML1045	TAG47:2-FA18:2	Other	Up	0.6698	0.1258	2.0377	9	5	14	0			No	0.962822	1	Not significant
HML1071	TAG48:3-FA18:3	Other	Up	0.6698	0.1258	1.6809	10	4	14	0			No	0.962822	1	Not significant
HML1067	TAG48:3-FA16:0	Other	Up	0.6698	0.1258	1.295	9	5	14	0			No	0.962822	1	Not significant
HML1244	TAG53:2-FA18:1	Other	Up	0.6698	0.1258	1.2086	7	4	11	3			No	0.962822	1	Not significant
HML1088	TAG49:1-FA15:0	Other	Up	0.6698	0.1258	1.054	8	6	14	0			No	0.962822	1	Not significant
HML1135	TAG50:4-FA18:1	Other	Up	0.6698	0.1258	1.3893	10	4	14	0			No	0.962822	1	Not significant
HML0537	PE 22:6-22:6	PE	Up	0.6698	0.1258	1.0306	9	5	14	0			No	0.962822	0.879112	Not significant
HMDB0010404	LPC 22:6	LPC	Up	0.6698	0.1258	1.0045	8	6	14	0			No	0.962822	0.745924	Not significant
HML1387	TAG56:8-FA18:2	Other	Up	0.6698	0.1258	1.1366	9	5	14	0			No	0.962822	1	Not significant
HMDB0000614	PS 16:0-16:0	PS	Down	0.6698	0.1258	0.9193	0	1	1	20			No	0.962822	0.897913	Not significant
HML0815	PS 18:1-22:1	PS	Up	0.6698	0.1258	1.0967	3	2	5	11			No	0.962822	0.897913	Not significant
HML1219	TAG52:5-FA16:0	Other	Up	0.6698	0.1258	1.0204	8	6	14	0			No	0.962822	1	Not significant
HML0624	PI 16:0-20:0	PI	Up	0.6698	0.1258	1.5094	2	1	3	17			No	0.962822	0.958689	Not significant
HML1247	TAG53:3-FA17:0	Other	—	0.6698	0.1258		0	0	0	27			No	0.962822	1	Not significant
HML1361	TAG56:6-FA18:0	Other	—	0.6698	0.1258	1.0137	7	7	14	0			No	0.962822	1	Not significant
HMDB0011775	Cer d18:1/22:1	Cer	Up	0.6698	0.1258	1.2643	5	2	7	8			No	0.962822	0.791582	Not significant
HML1338	TAG56:3-FA20:0	Other	—	0.6698	0.1258	0.8088	7	7	14	0			No	0.962822	1	Not significant
HML1337	TAG56:3-FA18:2	Other	—	0.6698	0.1258	0.8453	7	7	14	0			No	0.962822	1	Not significant
HML0720	PI 20:0-22:1	PI	—	0.6698	0.1258	0.954	3	3	6	10			No	0.962822	0.958689	Not significant
HML1354	TAG56:5-FA20:1	Other	Down	0.6698	0.1258	0.8359	5	9	14	0			No	0.962822	1	Not significant
HML0834	PS 18:3-20:5	PS	Up	0.6698	0.1258	1.1154	8	6	14	0			No	0.962822	0.897913	Not significant
HML0725	PI 20:0-22:6	PI	—	0.6698	0.1258	1.039	2	2	4	13			No	0.962822	0.958689	Not significant
HML0713	PI 20:0-20:0	PI	—	0.6698	0.1258		0	0	0	26			No	0.962822	0.958689	Not significant
HML1167	TAG51:3-FA18:3	Other	—	0.6698	0.1258	0.9443	6	6	12	2			No	0.962822	1	Not significant
HMDB0012395	PS 18:1-22:6	PS	Up	0.6698	0.1258	1.0447	7	5	12	2			No	0.962822	0.897913	Not significant
HML0798	PS 16:1-22:6	PS	—	0.6698	0.1258		0	0	0	26			No	0.962822	0.897913	Not significant
HML0945	SM 41:0	SM	—	0.6698	0.1258	1.02	7	7	14	0			No	0.962822	0.707011	Not significant
HML0914	SM 34:0	SM	—	0.6698	0.1258	0.9906	7	7	14	0			No	0.962822	0.707011	Not significant
HML0761	PI 20:4-22:0	PI	—	0.6698	0.1258		0	0	0	19			No	0.962822	0.958689	Not significant
HML0014	DAG 16:0-18:2	DG	Up	0.6698	0.1258	1.0815	8	6	14	0			No	0.962822	0.80202	Not significant
HML1173	TAG51:5-FA18:2	Other	Up	0.6698	0.1258	1.317	8	6	14	0			No	0.962822	1	Not significant
HML0740	PI 20:2-20:4	PI	Up	0.6698	0.1258	1.3839	6	1	7	8			No	0.962822	0.958689	Not significant
HML1295	TAG54:5-FA18:2	Other	Down	0.6698	0.1258	0.9013	5	9	14	0			No	0.962822	1	Not significant
HML1031	TAG47:0-FA14:0	Other	Down	0.6698	0.1258	0.868	3	6	9	5			No	0.962822	1	Not significant
HML1056	TAG48:2-FA12:0	Other	Up	0.6698	0.1258	1.1673	8	6	14	0			No	0.962822	1	Not significant
HML1054	TAG48:1-FA18:0	Other	Up	0.6698	0.1258	1.1643	7	5	12	2			No	0.962822	1	Not significant
HML0256	PE 18:3-22:1	PE	Down	0.694887	0.1048	1	0	1	3	17			No	0.962822	0.891617	Not significant
HML0651	PI 18:0-18:3	PI	Down	0.714844	0.1091	0.6447	2	7	9	5			No	0.962822	0.958689	Not significant
HML1000	TAG45:0-FA16:0	Other	Down	0.714844	0.1091	0.7671	6	7	13	1			No	0.962822	1	Not significant
HML1041	TAG47:2-FA14:0	Other	Up	0.714844	0.1091	1.4492	9	4	13	1			No	0.962822	1	Not significant
HML1028	TAG46:3-FA18:2	Other	Up	0.714844	0.1091	1.5094	9	5	14	0			No	0.962822	1	Not significant
HML1270	TAG54:3-FA16:0	Other	—	0.714844	0.1091	1.1292	7	7	14	0			No	0.962822	1	Not significant
HML0583	PI 22:2-22:6	PI	Down	0.714844	0.1091	0.9615	2	3	5	12			No	0.962822	0.958689	Not significant
HML0588	PI 22:4-22:4	PI	Up	0.714844	0.1091	1.3359	3	1	4	12			No	0.962822	0.958689	Not significant
HML0408	PG 18:4-20:1	PG	—	0.714844	0.1091		0	0	0	26			No	0.962822	0.948358	Not significant
HML1284	TAG54:4-FA18:3	Other	—	0.714844	0.1091	0.9572	7	7	14	0			No	0.962822	1	Not significant
HML1280	TAG54:4-FA16:1	Other	—	0.714844	0.1091	0.9851	7	7	14	0			No	0.962822	1	Not significant
HML1066	TAG48:3-FA14:1	Other	Up	0.714844	0.1091	1.331	9	5	14	0			No	0.962822	1	Not significant
HML1001	TAG45:1-FA15:0	Other	Up	0.714844	0.1091	1.3242	8	3	11	3			No	0.962822	1	Not significant
HML0037	DAG 20:1-20:2	DG	Down	0.714844	0.1091	0.7959	1	2	3	13			No	0.962822	0.80202	Not significant
HMDB0009001	PE 18:0-20:3	PE	Up	0.714844	0.1091	1.6493	6	2	8	6			No	0.962822	0.891617	Not significant
HMDB0007161	DAG 18:0-18:2	DG	Up	0.714844	0.1091	1.1833	8	5	13	1			No	0.962822	0.80202	Not significant
HML1156	TAG51:1-FA18:1	Other	Up	0.714844	0.1091	1.0688	8	6	14	0			No	0.962822	1	Not significant
HML1161	TAG51:2-FA18:1	Other	Up	0.714844	0.1091	1.1205	8	6	14	0			No	0.962822	1	Not significant
HML0906	PS 20:5-20:5	PS	Up	0.714844	0.1091	1.1673	5	3	8	6			No	0.962822	0.897913	Not significant
HMDB0011473	LPE 16:0	LPE	Down	0.714844	0.1091	0.9686	6	8	14	0			No	0.962822	0.953125	Not significant
HML0816	PS 18:1-22:2	PS	—	0.714844	0.1091	0.9929	1	1	2	17			No	0.962822	0.897913	Not significant
HMDB0011482	LPE 20:1	LPE	—	0.714844	0.1091	1.024	7	7	14	0			No	0.962822	0.953125	Not significant
HML1204	TAG52:3-FA22:1	Other	Up	0.714844	0.1091	1.0561	8	6	14	0			No	0.962822	1	Not significant
HML0724	PI 20:0-22:5	PI	Down	0.714844	0.1091	0.8696	1	2	3	12			No	0.962822	0.958689	Not significant
HML0718	PI 20:0-20:5	PI	—	0.714844	0.1091	0.9837	2	2	4	13			No	0.962822	0.958689	Not significant
HML1377	TAG56:7-FA18:3	Other	Up	0.714844	0.1091	1.245	8	6	14	0			No	0.962822	1	Not significant
HMDB0010387	LPC 18:3	LPC	Up	0.714844	0.1091	1.3816	9	5	14	0			No	0.962822	0.745924	Not significant
HML1335	TAG56:3-FA18:0	Other	—	0.714844	0.1091	1.064	7	7	14	0			No	0.962822	1	Not significant
HML0732	PI 20:1-22:1	PI	—	0.714844	0.1091		0	0	0	22			No	0.962822	0.958689	Not significant
HML0051	LPC 22:0	LPC	Up	0.714844	0.1091	1.1305	9	5	14	0			No	0.962822	0.745924	Not significant
HMDB0011472	LPE 15:0	LPE	—	0.714844	0.1091	0.9983	7	7	14	0			No	0.962822	0.953125	Not significant
HML0963	SM 43:6	SM	Down	0.714844	0.1091	0.8887	6	8	14	0			No	0.962822	0.740838	Not significant
HML1403	TAG58:3-FA18:1	Other	Down	0.714844	0.1091	0.897	4	7	11	3			No	0.962822	1	Not significant
HML0800	PS 18:0-18:1	PS	Up	0.714844	0.1091	1.3913	8	6	14	0			No	0.962822	0.897913	Not significant
HML0801	PS 18:0-18:3	PS	Up	0.714844	0.1091	1.1112	7	4	11	4			No	0.962822	0.897913	Not significant
HML0664	PI 18:1-20:4	PI	Down	0.714844	0.1091	0.872	2	4	6	9			No	0.962822	0.958689	Not significant
HML1294	TAG54:5-FA18:1	Other	Down	0.714844	0.1091	0.8961	5	9	14	0			No	0.962822	1	Not significant
HML1021	TAG46:2-FA18:2	Other	Up	0.714844	0.1091	1.3671	8	6	14	0			No	0.962822	1	Not significant
HML1077	TAG48:4-FA18:1	Other	—	0.714844	0.1091	1.3123	7	7	14	0			No	0.962822	1	Not significant
HML0586	PI 22:3-22:5	PI	Up	0.714844	0.1091	1.0709	2	1	3	14			No	0.962822	0.958689	Not significant
HML0298	PE 20:1-22:6	PE	Up	0.714844	0.1091	1.0117	8	4	12	2			No	0.962822	0.891617	Not significant
HML1256	TAG54:0-FA16:0	Other	Down	0.714844	0.1091	0.9541	6	8	14	0			No	0.962822	1	Not significant
HML0371	PG 18:1-20:1	PG	Up	0.714844	0.1091	1.012	3	2	5	10			No	0.962822	0.948358	Not significant
HML0572	PI 22:0-22:6	PI	Down	0.714844	0.1091	0.721	0	2	2	15			No	0.962822	0.958689	Not significant
HML1222	TAG52:5-FA18:2	Other	—	0.714844	0.1091	0.9761	7	7	14	0			No	0.962822	1	Not significant
HML0564	PG 22:5-22:6	PG	Up	0.714844	0.1091	1.0216	6	5	11	3			No	0.962822	0.948358	Not significant
HML0574	PI 22:1-22:2	PI	Up	0.714844	0.1091	1.4421	2	0	2	19			No	0.962822	0.958689	Not significant
HML0426	PG 20:0-22:0	PG	—	0.714844	0.1091	0.9972	1	1	2	17			No	0.962822	0.948358	Not significant
HML1111	TAG50:1-FA18:0	Other	Up	0.714844	0.1091	1.4228	9	5	14	0			No	0.962822	1	Not significant
HML1115	TAG50:2-FA14:1	Other	—	0.714844	0.1091	1.101	3	3	6	8			No	0.962822	1	Not significant
HML1105	TAG50:0-FA14:0	Other	Up	0.714844	0.1091	1.3182	6	4	10	4			No	0.962822	1	Not significant
HML0988	TAG44:1-FA16:0	Other	Up	0.714844	0.1091	1.1287	9	5	14	0			No	0.962822	1	Not significant
HMDB0007100	DAG 16:0-18:0	DG	Up	0.714844	0.1091	1.018	9	5	14	0			No	0.962822	0.80202	Not significant
HML1434	TAG60:12-FA22:6	Other	Down	0.714844	0.1091	0.8607	4	6	10	4			No	0.962822	1	Not significant
HML1005	TAG46:0-FA14:0	Other	Up	0.714844	0.1091	1.2202	8	6	14	0			No	0.962822	1	Not significant
HML0817	PS 18:1-22:3	PS	—	0.714844	0.1091		0	0	0	26			No	0.962822	0.897913	Not significant
HML1327	TAG56:10-FA18:2	Other	—	0.714844	0.1091	0.9241	5	5	10	4			No	0.962822	1	Not significant
HML0760	PI 20:4-20:5	PI	Up	0.714844	0.1091	1.4245	2	0	2	14			No	0.962822	0.958689	Not significant
HML0824	PS 18:2-22:2	PS	Up	0.714844	0.1091	1.1122	3	2	5	11			No	0.962822	0.897913	Not significant
HML0737	PI 20:1-22:6	PI	Up	0.714844	0.1091	1.0055	4	3	7	7			No	0.962822	0.958689	Not significant
HML0452	PG 20:2-22:3	PG	Down	0.714844	0.1091	0.9955	3	4	7	8			No	0.962822	0.948358	Not significant
HML0245	PE 18:2-22:3	PE	Up	0.729827	0.0923	1.0097	5	3	8	8			No	0.962822	0.891617	Not significant
HML0434	PG 20:1-20:2	PG	Up	0.753152	0.084	1.0153	1	0	2	19			No	0.962822	0.948358	Not significant
HMDB0009028	PE 18:1-18:3	PE	Up	0.753152	0.084	1.0228	2	0	3	12			No	0.962822	0.891617	Not significant
HML1029	TAG46:3-FA18:3	Other	Down	0.760864	0.0923	0.9564	5	6	11	3			No	0.962822	1	Not significant
HML1024	TAG46:3-FA14:1	Other	Down	0.760864	0.0923	0.9003	5	8	13	1			No	0.962822	1	Not significant
HML1010	TAG46:1-FA14:1	Other	—	0.760864	0.0923	0.9244	7	7	14	0			No	0.962822	1	Not significant
HML0774	PI 20:5-22:5	PI	—	0.760864	0.0923		0	0	0	26			No	0.962822	0.958689	Not significant
HML0733	PI 20:1-22:2	PI	Up	0.760864	0.0923	1.1501	2	0	2	19			No	0.962822	0.958689	Not significant
HML0746	PI 20:2-22:4	PI	—	0.760864	0.0923	0.9828	3	3	6	13			No	0.962822	0.958689	Not significant
HML0445	PG 20:2-20:2	PG	—	0.760864	0.0923		0	0	0	22			No	0.962822	0.948358	Not significant
HML0427	PG 20:0-22:1	PG	—	0.760864	0.0923	1.011	7	7	14	0			No	0.962822	0.948358	Not significant
HML0433	PG 20:1-20:1	PG	—	0.760864	0.0923	1.0027	2	2	4	13			No	0.962822	0.948358	Not significant
HMDB0008923	PE 16:0-16:0	PE	Down	0.760864	0.0923	0.9969	6	8	14	0			No	0.962822	0.891617	Not significant
HMDB0009027	PE 18:1-18:2	PE	—	0.760864	0.0923	0.9982	5	5	10	4			No	0.962822	0.891617	Not significant
HML0429	PG 20:0-22:3	PG	—	0.760864	0.0923		0	0	0	24			No	0.962822	0.948358	Not significant
HML0892	PS 20:3-22:0	PS	Down	0.760864	0.0923	0.9592	0	1	1	21			No	0.962822	0.911268	Not significant
HML0901	PS 20:4-22:1	PS	Up	0.760864	0.0923	1.0307	7	6	13	2			No	0.962822	0.911268	Not significant
HML0900	PS 20:4-22:0	PS	Up	0.760864	0.0923	1.0593	8	6	14	0			No	0.962822	0.911268	Not significant
HML0756	PI 20:3-22:4	PI	—	0.760864	0.0923	0.9861	3	3	6	10			No	0.962822	0.958689	Not significant
HML0752	PI 20:3-22:0	PI	—	0.760864	0.0923		0	0	0	22			No	0.962822	0.958689	Not significant
HMDB0009795	PI 16:0-22:5	PI	Down	0.760864	0.0923	0.8868	4	9	13	1			No	0.962822	0.958689	Not significant
HML1418	TAG58:7-FA22:6	Other	—	0.760864	0.0923	1.0471	7	7	14	0			No	0.962822	1	Not significant
HML1042	TAG47:2-FA15:0	Other	Up	0.760864	0.0923	1.1444	8	6	14	0			No	0.962822	1	Not significant
HML0235	PE 18:1-22:0	PE	—	0.760864	0.0923		0	0	0	23			No	0.962822	0.891617	Not significant
HML1277	TAG54:3-FA20:2	Other	—	0.760864	0.0923	1.0648	7	7	14	0			No	0.962822	1	Not significant
HML1271	TAG54:3-FA16:1	Other	—	0.760864	0.0923	0.9849	7	7	14	0			No	0.962822	1	Not significant
HML0669	PI 18:1-22:3	PI	Up	0.760864	0.0923	1.2506	4	3	7	8			No	0.962822	0.958689	Not significant
HML0655	PI 18:0-20:5	PI	Down	0.760864	0.0923	0.9055	5	9	14	0			No	0.962822	0.958689	Not significant
HML1301	TAG54:5-FA22:1	Other	Down	0.760864	0.0923	0.8702	6	8	14	0			No	0.962822	1	Not significant
HML0984	TAG44:0-FA18:0	Other	Down	0.760864	0.0923	0.798	5	6	11	3			No	0.962822	1	Not significant
HML1002	TAG45:1-FA16:0	Other	Up	0.760864	0.0923	1.0364	7	6	13	1			No	0.962822	1	Not significant
HML0983	TAG44:0-FA16:0	Other	—	0.760864	0.0923	1.0303	7	7	14	0			No	0.962822	1	Not significant
HML0985	TAG44:1-FA12:0	Other	—	0.760864	0.0923	1.1104	7	7	14	0			No	0.962822	1	Not significant
HML0023	DAG 18:1-18:4	DG	Down	0.760864	0.0923	0.8809	4	5	9	7			No	0.962822	0.813948	Not significant
HML0022	DAG 18:1-18:3	DG	Up	0.760864	0.0923	1.1025	8	6	14	0			No	0.962822	0.813948	Not significant
HMDB0010610	PG 18:0-20:4	PG	—	0.760864	0.0923	0.9902	1	1	2	20			No	0.962822	0.948358	Not significant
HML1074	TAG48:4-FA14:1	Other	—	0.760864	0.0923	1.0718	7	7	14	0			No	0.962822	1	Not significant
HML1429	TAG58:9-FA22:6	Other	—	0.760864	0.0923	0.9699	7	7	14	0			No	0.962822	1	Not significant
HML0573	PI 22:1-22:1	PI	—	0.760864	0.0923	1.0168	2	2	4	13			No	0.962822	0.958689	Not significant
HML1258	TAG54:1-FA16:0	Other	Down	0.760864	0.0923	0.6918	4	8	12	2			No	0.962822	1	Not significant
HML0633	PI 16:1-18:2	PI	Up	0.760864	0.0923	1.0545	7	5	12	2			No	0.962822	0.958689	Not significant
HML1081	TAG48:5-FA18:2	Other	Up	0.760864	0.0923	1.736	8	6	14	0			No	0.962822	1	Not significant
HML0527	PE 22:2-22:6	PE	Up	0.760864	0.0923	1.0116	4	1	5	11			No	0.962822	0.891617	Not significant
HML0481	PG 20:5-22:6	PG	Down	0.760864	0.0923	0.966	0	3	3	16			No	0.962822	0.948358	Not significant
HML1188	TAG52:2-FA18:1	Other	Up	0.760864	0.0923	1.0147	8	6	14	0			No	0.962822	1	Not significant
HML1078	TAG48:4-FA18:2	Other	—	0.760864	0.0923	1.3943	7	7	14	0			No	0.962822	1	Not significant
HML0361	PG 18:0-18:4	PG	Up	0.760864	0.0923	1.0124	3	2	5	10			No	0.962822	0.948358	Not significant
HML1101	TAG49:3-FA16:0	Other	Up	0.760864	0.0923	1.4083	9	5	14	0			No	0.962822	1	Not significant
HML0294	PE 20:1-22:2	PE	—	0.760864	0.0923		0	0	0	23			No	0.962822	0.891617	Not significant
HML1082	TAG48:5-FA18:3	Other	Up	0.760864	0.0923	1.4517	7	6	13	1			No	0.962822	1	Not significant
HML1229	TAG52:6-FA16:0	Other	—	0.760864	0.0923	1.0762	7	7	14	0			No	0.962822	1	Not significant
HML0569	PI 22:0-22:3	PI	Up	0.760864	0.0923	1.1155	2	1	3	17			No	0.962822	0.958689	Not significant
HML0309	PE 20:3-22:0	PE	Up	0.760864	0.0923	1.0048	2	1	3	17			No	0.962822	0.891617	Not significant
HML1107	TAG50:0-FA18:0	Other	Up	0.760864	0.0923	1.5322	8	6	14	0			No	0.962822	1	Not significant
HML0691	PI 18:3-20:5	PI	—	0.760864	0.0923		0	0	0	22			No	0.962822	0.958689	Not significant
HML0198	PE 16:0-20:1	PE	—	0.760864	0.0923	1.0014	7	7	14	0			No	0.962822	0.891617	Not significant
HMDB0011475	LPE 18:1	LPE	Up	0.760864	0.0923	1.1965	9	5	14	0			No	0.962822	0.961092	Not significant
HMDB0010655	PG 18:2-20:4	PG	Up	0.760864	0.0923	1.0304	3	2	5	11			No	0.962822	0.948358	Not significant
HMDB0012362	PS 16:0-22:6	PS	—	0.760864	0.0923	0.9904	7	7	14	0			No	0.962822	0.911268	Not significant
HMDB0010657	PG 18:2-22:5	PG	Down	0.760864	0.0923	0.9623	6	8	14	0			No	0.962822	0.948358	Not significant
HML1359	TAG56:5-FA22:5	Other	—	0.760864	0.0923		0	0	0	21			No	0.962822	1	Not significant
HML1346	TAG56:4-FA20:2	Other	Up	0.760864	0.0923	1.1485	8	6	14	0			No	0.962822	1	Not significant
HML1392	TAG56:8-FA22:6	Other	Up	0.760864	0.0923	1.0854	8	6	14	0			No	0.962822	1	Not significant
HML0281	PE 20:0-22:0	PE	Up	0.779697	0.0748	1.0024	7	1	9	6			No	0.978837	0.891617	Not significant
HML0477	PG 20:5-22:2	PG	Down	0.801684	0.0671	0.9963	1	2	3	18			No	0.978837	0.948358	Not significant
HML1384	TAG56:8-FA16:0	Other	Up	0.807739	0.0755	1.1119	8	6	14	0			No	0.978837	1	Not significant
HMDB0009788	PI 16:0-20:3	PI	Up	0.807739	0.0755	1.1448	6	4	10	4			No	0.978837	0.96622	Not significant
HMDB0010570	PG 16:0-16:0	PG	Up	0.807739	0.0755	1.1288	4	0	4	16			No	0.978837	0.948358	Not significant
HML0814	PS 18:1-22:0	PS	—	0.807739	0.0755	1.0527	7	7	14	0			No	0.978837	0.956289	Not significant
HMDB0009005	PE 18:0-20:5	PE	—	0.807739	0.0755	1.2898	1	1	2	18			No	0.978837	0.891617	Not significant
HML0447	PG 20:2-20:4	PG	Down	0.807739	0.0755	0.9822	0	1	1	23			No	0.978837	0.948358	Not significant
HML1144	TAG50:5-FA18:2	Other	Up	0.807739	0.0755	1.2469	8	6	14	0			No	0.978837	1	Not significant
HML0435	PG 20:1-20:3	PG	—	0.807739	0.0755		0	0	0	22			No	0.978837	0.948358	Not significant
HML1178	TAG52:1-FA16:0	Other	Up	0.807739	0.0755	1.3843	7	5	12	2			No	0.978837	1	Not significant
HML1177	TAG52:0-FA20:0	Other	Up	0.807739	0.0755	1.0526	8	6	14	0			No	0.978837	1	Not significant
HML1185	TAG52:2-FA16:0	Other	Up	0.807739	0.0755	1.0465	9	5	14	0			No	0.978837	1	Not significant
HML1183	TAG52:1-FA20:1	Other	Down	0.807739	0.0755	0.8342	6	8	14	0			No	0.978837	1	Not significant
HML1199	TAG52:3-FA18:3	Other	—	0.807739	0.0755		0	0	0	25			No	0.978837	1	Not significant
HML1075	TAG48:4-FA16:0	Other	Up	0.807739	0.0755	1.2893	8	6	14	0			No	0.978837	1	Not significant
HML0557	PG 22:3-22:4	PG	Up	0.807739	0.0755	1.0269	1	0	1	15			No	0.978837	0.948358	Not significant
HML0470	PG 20:4-22:3	PG	Up	0.807739	0.0755	1.0127	1	0	1	16			No	0.978837	0.948358	Not significant
HML1223	TAG52:5-FA18:3	Other	—	0.807739	0.0755	0.9808	7	7	14	0			No	0.978837	1	Not significant
HML0329	PE 20:5-22:5	PE	Up	0.807739	0.0755	1.02	9	5	14	0			No	0.978837	0.891617	Not significant
HML0590	PI 22:4-22:6	PI	Up	0.807739	0.0755	1.0157	2	0	2	16			No	0.978837	0.96622	Not significant
HML0642	PI 16:1-22:0	PI	Up	0.807739	0.0755	1.0179	1	0	1	17			No	0.978837	0.96622	Not significant
HML1123	TAG50:3-FA14:1	Other	Up	0.807739	0.0755	1.2172	8	6	14	0			No	0.978837	1	Not significant
HML0278	PE 20:0-20:3	PE	Up	0.807739	0.0755	1.0182	3	1	4	12			No	0.978837	0.891617	Not significant
HML1259	TAG54:1-FA18:0	Other	Down	0.807739	0.0755	0.9242	5	6	11	3			No	0.978837	1	Not significant
HML1322	TAG54:8-FA18:2	Other	Down	0.807739	0.0755	0.8103	6	7	13	1			No	0.978837	1	Not significant
HML0991	TAG44:2-FA12:0	Other	Down	0.807739	0.0755	0.5715	3	6	9	5			No	0.978837	1	Not significant
HML1315	TAG54:7-FA18:1	Other	—	0.807739	0.0755	1.1896	7	7	14	0			No	0.978837	1	Not significant
HML1330	TAG56:2-FA16:0	Other	Up	0.807739	0.0755	1.2665	8	6	14	0			No	0.978837	1	Not significant
HML1008	TAG46:1-FA12:0	Other	—	0.807739	0.0755	0.9882	7	7	14	0			No	0.978837	1	Not significant
HML1018	TAG46:2-FA16:0	Other	—	0.807739	0.0755	1.0677	7	7	14	0			No	0.978837	1	Not significant
HML0227	PE 18:0-22:0	PE	Down	0.807739	0.0755	0.9735	5	9	14	0			No	0.978837	0.891617	Not significant
HML0301	PE 20:2-22:0	PE	Down	0.807739	0.0755	0.9976	0	1	1	19			No	0.978837	0.891617	Not significant
HML1265	TAG54:2-FA18:1	Other	Down	0.807739	0.0755	0.9889	6	8	14	0			No	0.978837	1	Not significant
HML0034	DAG 20:0-22:5	DG	Down	0.807739	0.0755	0.8753	2	6	8	6			No	0.978837	0.844455	Not significant
HML0974	TAG42:1-FA12:0	Other	Down	0.807739	0.0755	0.8863	5	6	11	3			No	0.978837	1	Not significant
HML0722	PI 20:0-22:3	PI	Down	0.807739	0.0755	0.9456	1	2	3	16			No	0.978837	0.96622	Not significant
HML0697	PI 18:3-22:5	PI	Up	0.807739	0.0755	1.7129	4	0	4	11			No	0.978837	0.96622	Not significant
HML1343	TAG56:4-FA18:1	Other	—	0.807739	0.0755	1.0238	7	7	14	0			No	0.978837	1	Not significant
HMDB0009783	PI 16:0-18:1	PI	Up	0.807739	0.0755	1.0627	8	6	14	0			No	0.978837	0.96622	Not significant
HML0755	PI 20:3-22:3	PI	Down	0.807739	0.0755	0.9683	2	4	6	9			No	0.978837	0.96622	Not significant
HML0739	PI 20:2-20:3	PI	Down	0.807739	0.0755	0.7839	0	5	5	10			No	0.978837	0.96622	Not significant
HML1416	TAG58:7-FA22:4	Other	—	0.807739	0.0755	1.3094	1	1	2	18			No	0.978837	1	Not significant
HML0271	PE 18:4-22:3	PE	Up	0.833835	0.0561	1.004	3	1	5	11			No	0.984028	0.891617	Not significant
HML0257	PE 18:3-22:2	PE	Down	0.833885	0.0561	0.998	1	4	6	10			No	0.984028	0.891617	Not significant
HMDB0010580	PG 16:0-20:4	PG	Up	0.850582	0.0503	1.0456	8	6	14	0			No	0.984028	0.948358	Not significant
HML1043	TAG47:2-FA16:1	Other	—	0.855225	0.0587	1.0145	7	7	14	0			No	0.984028	1	Not significant
HML1051	TAG48:1-FA14:1	Other	Up	0.855225	0.0587	7.9037	1	0	1	23			No	0.984028	1	Not significant
HML0275	PE 20:0-20:0	PE	—	0.855225	0.0587	0.9992	3	3	6	12			No	0.984028	0.891617	Not significant
HML1261	TAG54:1-FA20:0	Other	Up	0.855225	0.0587	1.1767	8	6	14	0			No	0.984028	1	Not significant
HML0514	PE 22:0-22:4	PE	Down	0.855225	0.0587	0.9967	0	1	1	22			No	0.984028	0.891617	Not significant
HML1108	TAG50:1-FA14:0	Other	—	0.855225	0.0587	4.6512	1	1	2	16			No	0.984028	1	Not significant
HML0410	PG 18:4-20:3	PG	—	0.855225	0.0587	1.0045	1	1	2	20			No	0.984028	0.948358	Not significant
HML1109	TAG50:1-FA16:0	Other	—	0.855225	0.0587	0.9871	7	7	14	0			No	0.984028	1	Not significant
HML1085	TAG49:0-FA17:0	Other	Up	0.855225	0.0587	1.1343	8	6	14	0			No	0.984028	1	Not significant
HML1126	TAG50:3-FA18:0	Other	Up	0.855225	0.0587	1.1445	8	6	14	0			No	0.984028	1	Not significant
HML0331	PG 16:0-18:4	PG	Up	0.855225	0.0587	1.035	3	2	5	10			No	0.984028	0.948358	Not significant
HML0323	PE 20:5-20:5	PE	Up	0.855225	0.0587	1.0286	5	3	8	7			No	0.984028	0.891617	Not significant
HML0907	PS 20:5-22:0	PS	Up	0.855225	0.0587	1.7191	1	0	1	25			No	0.984028	0.978757	Not significant
HML0436	PG 20:1-20:4	PG	Up	0.855225	0.0587	1.0274	1	0	1	22			No	0.984028	0.948358	Not significant
HML1151	TAG51:0-FA18:0	Other	—	0.855225	0.0587	1.0046	7	7	14	0			No	0.984028	1	Not significant
HML1155	TAG51:1-FA18:0	Other	Up	0.855225	0.0587	1.2935	8	6	14	0			No	0.984028	1	Not significant
HML0441	PG 20:1-22:3	PG	Down	0.855225	0.0587	0.9936	0	1	1	17			No	0.984028	0.948358	Not significant
HML1171	TAG51:4-FA18:3	Other	—	0.855225	0.0587	1.1029	7	7	14	0			No	0.984028	1	Not significant
HMDB0010582	PG 16:0-22:5	PG	Up	0.855225	0.0587	1.0371	1	0	1	21			No	0.984028	0.948358	Not significant
HMDB0010391	LPC 20:1	LPC	Down	0.855225	0.0587	0.9793	5	9	14	0			No	0.984028	0.855225	Not significant
HML1263	TAG54:2-FA16:0	Other	Down	0.855225	0.0587	0.9176	6	8	14	0			No	0.984028	1	Not significant
HML1013	TAG46:1-FA18:0	Other	Down	0.855225	0.0587	0.9431	5	6	11	3			No	0.984028	1	Not significant
HML0300	PE 20:2-20:5	PE	Up	0.855225	0.0587	1.0154	1	0	1	18			No	0.984028	0.891617	Not significant
HML0285	PE 20:0-22:4	PE	—	0.855225	0.0587		0	0	0	23			No	0.984028	0.891617	Not significant
HML1015	TAG46:2-FA12:0	Other	—	0.855225	0.0587	1.1196	7	7	14	0			No	0.984028	1	Not significant
HML0312	PE 20:3-22:3	PE	—	0.855225	0.0587	1.0063	3	3	6	8			No	0.984028	0.891617	Not significant
HML1033	TAG47:0-FA16:0	Other	—	0.855225	0.0587	1.0472	7	7	14	0			No	0.984028	1	Not significant
HML1289	TAG54:4-FA22:1	Other	Down	0.855225	0.0587	0.9383	6	8	14	0			No	0.984028	1	Not significant
HML1025	TAG46:3-FA16:0	Other	—	0.855225	0.0587	1.075	7	7	14	0			No	0.984028	1	Not significant
HML0723	PI 20:0-22:4	PI	—	0.855225	0.0587		0	0	0	23			No	0.984028	0.991641	Not significant
HML1364	TAG56:6-FA18:3	Other	—	0.855225	0.0587	0.9653	7	7	14	0			No	0.984028	1	Not significant
HML0772	PI 20:5-22:3	PI	—	0.855225	0.0587	1.012	4	4	8	7			No	0.984028	0.991641	Not significant
HML1048	TAG48:0-FA18:0	Other	Down	0.855225	0.0587	0.9264	4	7	11	3			No	0.984028	1	Not significant
HML0380	PG 18:1-22:5	PG	—	0.855225	0.0587	0.9943	1	1	2	14			No	0.984028	0.948358	Not significant
HML0392	PG 18:3-18:4	PG	Down	0.855225	0.0587	0.9937	0	1	1	18			No	0.984028	0.948358	Not significant
HML1212	TAG52:4-FA20:0	Other	Up	0.855225	0.0587	1.0782	8	6	14	0			No	0.984028	1	Not significant
HML1339	TAG56:3-FA20:1	Other	Down	0.855225	0.0587	0.8286	6	8	14	0			No	0.984028	1	Not significant
HML0871	PS 20:1-20:3	PS	—	0.855225	0.0587		0	0	0	27			No	0.984028	0.978757	Not significant
HML1397	TAG58:10-FA18:2	Other	Down	0.855225	0.0587	0.8811	6	8	14	0			No	0.984028	1	Not significant
HML0823	PS 18:2-22:1	PS	Up	0.855225	0.0587	1.0476	7	5	12	3			No	0.984028	0.978757	Not significant
HML1194	TAG52:3-FA16:0	Other	—	0.855225	0.0587	1.0342	7	7	14	0			No	0.984028	1	Not significant
HML0523	PE 22:2-22:2	PE	Down	0.855225	0.0587	0.9984	0	1	1	20			No	0.984028	0.891617	Not significant
HML0437	PG 20:1-20:5	PG	—	0.855225	0.0587		0	0	0	24			No	0.984028	0.948358	Not significant
HML0221	PE 18:0-18:0	PE	Up	0.855225	0.0587	1.0339	4	2	6	8			No	0.984028	0.891617	Not significant
HML0765	PI 20:4-22:4	PI	Up	0.855225	0.0587	1.2259	5	3	8	8			No	0.984028	0.991641	Not significant
HMDB0116589	PG 20:4-20:4	PG	Up	0.855225	0.0587	1.009	1	0	1	17			No	0.984028	0.948358	Not significant
HML0766	PI 20:4-22:5	PI	Up	0.855225	0.0587	1.0478	5	4	9	7			No	0.984028	0.991641	Not significant
HML1402	TAG58:2-FA18:1	Other	Down	0.855225	0.0587	0.8663	6	8	14	0			No	0.984028	1	Not significant
HML0696	PI 18:3-22:4	PI	Down	0.855225	0.0587	0.9927	0	1	1	16			No	0.984028	0.991641	Not significant
HML0976	TAG42:1-FA16:0	Other	—	0.855225	0.0587	0.926	7	7	14	0			No	0.984028	1	Not significant
HML0225	PE 18:0-20:0	PE	Up	0.855225	0.0587	1.0039	6	3	9	6			No	0.984028	0.891617	Not significant
HML0428	PG 20:0-22:2	PG	Up	0.861304	0.0467	1.0014	2	1	4	17			No	0.989255	0.948358	Not significant
HML0412	PG 18:4-20:5	PG	—	0.900061	0.0336	1	2	2	4	15			No	0.989255	0.948358	Not significant
HMDB0008934	PE 16:0-20:2	PE	—	0.900061	0.0336	1.0012	5	5	10	5			No	0.989255	0.915656	Not significant
HMDB0008924	PE 16:0-16:1	PE	Up	0.900061	0.0336	1.0212	5	3	8	7			No	0.989255	0.915656	Not significant
HML0348	PG 16:1-20:4	PG	—	0.903198	0.0419	1.0082	2	2	4	12			No	0.989255	0.948358	Not significant
HML0345	PG 16:1-20:1	PG	—	0.903198	0.0419		0	0	0	17			No	0.989255	0.948358	Not significant
HML0575	PI 22:1-22:3	PI	—	0.903198	0.0419		0	0	0	21			No	0.989255	1	Not significant
HMDB0010612	PG 18:0-22:5	PG	Down	0.903198	0.0419	0.9964	3	4	7	8			No	0.989255	0.948358	Not significant
HML0813	PS 18:1-20:4	PS	Down	0.903198	0.0419	0.9251	2	3	5	9			No	0.989255	0.979257	Not significant
HML1252	TAG53:4-FA18:3	Other	—	0.903198	0.0419		0	0	0	27			No	0.989255	1	Not significant
HML1240	TAG53:1-FA18:0	Other	Up	0.903198	0.0419	1.5969	1	0	1	23			No	0.989255	1	Not significant
HML1049	TAG48:1-FA12:0	Other	—	0.903198	0.0419	1.1721	2	2	4	12			No	0.989255	1	Not significant
HML1157	TAG51:2-FA15:0	Other	Up	0.903198	0.0419	1.0454	8	6	14	0			No	0.989255	1	Not significant
HML0544	PG 22:0-22:6	PG	—	0.903198	0.0419		0	0	0	22			No	0.989255	0.948358	Not significant
HML0546	PG 22:1-22:2	PG	Up	0.903198	0.0419	1.0046	1	0	1	21			No	0.989255	0.948358	Not significant
HML1118	TAG50:2-FA18:0	Other	—	0.903198	0.0419	1.1586	7	7	14	0			No	0.989255	1	Not significant
HML1210	TAG52:4-FA18:2	Other	Up	0.903198	0.0419	1.0789	8	6	14	0			No	0.989255	1	Not significant
HMDB0010572	PG 16:0-18:0	PG	—	0.903198	0.0419	1.0081	2	2	4	13			No	0.989255	0.948358	Not significant
HMDB0010621	PG 18:1-18:3	PG	—	0.903198	0.0419	0.993	7	7	14	0			No	0.989255	0.948358	Not significant
HML0887	PS 20:2-22:4	PS	—	0.903198	0.0419		0	0	0	26			No	0.989255	0.979257	Not significant
HML0829	PS 18:3-20:0	PS	—	0.903198	0.0419		0	0	0	24			No	0.989255	0.979257	Not significant
HML1336	TAG56:3-FA18:1	Other	Down	0.903198	0.0419	0.7799	6	8	14	0			No	0.989255	1	Not significant
HML0797	PS 16:1-22:5	PS	Down	0.903198	0.0419	0.7477	0	1	1	22			No	0.989255	0.979257	Not significant
HML0762	PI 20:4-22:1	PI	Up	0.903198	0.0419	1.1707	2	0	2	19			No	0.989255	1	Not significant
HMDB0112351	PS 16:0-22:2	PS	Down	0.903198	0.0419	0.7832	0	2	2	22			No	0.989255	0.979257	Not significant
HML1176	TAG52:0-FA18:0	Other	Down	0.903198	0.0419	0.7438	1	2	3	16			No	0.989255	1	Not significant
HML0439	PG 20:1-22:1	PG	—	0.903198	0.0419		0	0	0	21			No	0.989255	0.948358	Not significant
HML0463	PG 20:3-22:4	PG	Up	0.903198	0.0419	1.0309	9	5	14	0			No	0.989255	0.948358	Not significant
HML1162	TAG51:2-FA18:2	Other	—	0.903198	0.0419	0.9954	7	7	14	0			No	0.989255	1	Not significant
HML1192	TAG52:2-FA20:2	Other	—	0.903198	0.0419	0.9998	7	7	14	0			No	0.989255	1	Not significant
HML1197	TAG52:3-FA18:1	Other	Up	0.903198	0.0419	1.0266	8	6	14	0			No	0.989255	1	Not significant
HML0462	PG 20:3-22:3	PG	Up	0.903198	0.0419	1.0467	7	3	10	4			No	0.989255	0.948358	Not significant
HMDB0009809	PI 18:0-18:2	PI	Up	0.903198	0.0419	1.0551	8	6	14	0			No	0.989255	1	Not significant
HML0222	PE 18:0-18:1	PE	Down	0.903198	0.0419	0.9049	6	8	14	0			No	0.989255	0.915656	Not significant
HML0211	PE 16:1-20:4	PE	Up	0.903198	0.0419	1.0535	4	2	6	9			No	0.989255	0.915656	Not significant
HML0972	TAG42:0-FA14:0	Other	Down	0.903198	0.0419	0.7446	5	7	12	2			No	0.989255	1	Not significant
HML0977	TAG42:1-FA16:1	Other	Up	0.903198	0.0419	1.2272	8	5	13	1			No	0.989255	1	Not significant
HML0998	TAG45:0-FA14:0	Other	Up	0.903198	0.0419	1.0323	7	6	13	1			No	0.989255	1	Not significant
HML1323	TAG54:8-FA18:3	Other	—	0.903198	0.0419	0.9248	7	7	14	0			No	0.989255	1	Not significant
HML0999	TAG45:0-FA15:0	Other	—	0.903198	0.0419	1.0738	7	7	14	0			No	0.989255	1	Not significant
HML0981	TAG44:0-FA12:0	Other	Down	0.903198	0.0419	0.6864	5	6	11	3			No	0.989255	1	Not significant
HML0650	PI 18:0-18:1	PI	—	0.903198	0.0419		0	0	0	22			No	0.989255	1	Not significant
HML1288	TAG54:4-FA20:4	Other	Up	0.903198	0.0419	1.3559	3	2	5	11			No	0.989255	1	Not significant
HML0993	TAG44:2-FA16:0	Other	Up	0.903198	0.0419	1.2975	8	6	14	0			No	0.989255	1	Not significant
HMDB0009799	PI 16:1-18:0	PI	Up	0.903198	0.0419	1.1373	8	6	14	0			No	0.989255	1	Not significant
HML0966	SM 44:2	SM	—	0.903198	0.0419	0.9987	7	7	14	0			No	0.989255	0.903198	Not significant
HMDB0011474	LPE 16:1	LPE	Up	0.903198	0.0419	1.0273	8	6	14	0			No	0.989255	1	Not significant
HML0004	Cer d18:1/16:0	Cer	Down	0.903198	0.0419	0.9621	6	8	14	0			No	0.989255	0.951538	Not significant
HML0687	PI 18:3-20:1	PI	—	0.903198	0.0419		0	0	0	26			No	0.989255	1	Not significant
HML1273	TAG54:3-FA18:1	Other	Down	0.903198	0.0419	0.9678	6	8	14	0			No	0.989255	1	Not significant
HML1272	TAG54:3-FA18:0	Other	Up	0.903198	0.0419	1.0518	8	6	14	0			No	0.989255	1	Not significant
HML0915	SM 34:1	SM	—	0.903198	0.0419	0.9999	7	7	14	0			No	0.989255	0.903198	Not significant
HML0992	TAG44:2-FA14:0	Other	Down	0.903198	0.0419	0.7346	6	8	14	0			No	0.989255	1	Not significant
HMDB0009781	PI 16:0-18:0	PI	—	0.903198	0.0419		0	0	0	24			No	0.989255	1	Not significant
HML1251	TAG53:4-FA18:2	Other	Down	0.951538	0.0252	0.8881	1	3	4	11			No	1	1	Not significant
HML0776	PS 16:0-18:4	PS	Up	0.951538	0.0252	1.0694	7	5	12	3			No	1	0.980084	Not significant
HML1274	TAG54:3-FA18:2	Other	—	0.951538	0.0252	1.0214	7	7	14	0			No	1	1	Not significant
HML0975	TAG42:1-FA14:0	Other	—	0.951538	0.0252	0.8859	7	7	14	0			No	1	1	Not significant
HML0055	LPE 19:1	LPE	Up	0.951538	0.0252	1.0054	7	5	12	3			No	1	1	Not significant
HML0036	DAG 20:1-20:1	DG	—	0.951538	0.0252	0.9805	5	5	10	4			No	1	0.972683	Not significant
HML0809	PS 18:0-22:3	PS	Up	0.951538	0.0252	1.311	3	2	5	13			No	1	0.980084	Not significant
HMDB0012380	PS 18:0-18:2	PS	Up	0.951538	0.0252	1.3183	5	4	9	7			No	1	0.980084	Not significant
HML0764	PI 20:4-22:3	PI	Up	0.951538	0.0252	1.0731	5	3	8	7			No	1	1	Not significant
HMDB0012393	PS 18:1-20:3	PS	—	0.951538	0.0252		0	0	0	27			No	1	0.980084	Not significant
HML1401	TAG58:10-FA22:6	Other	Down	0.951538	0.0252	0.8589	6	8	14	0			No	1	1	Not significant
HML1198	TAG52:3-FA18:2	Other	—	0.951538	0.0252	1.0211	7	7	14	0			No	1	1	Not significant
HML1143	TAG50:5-FA18:1	Other	Up	0.951538	0.0252	1.3235	9	5	14	0			No	1	1	Not significant
HML1180	TAG52:1-FA18:0	Other	—	0.951538	0.0252	0.9967	7	7	14	0			No	1	1	Not significant
HML0405	PG 18:3-22:6	PG	Up	0.951538	0.0252	1.0088	3	0	3	19			No	1	0.980726	Not significant
HML1182	TAG52:1-FA20:0	Other	Up	0.951538	0.0252	1.3714	5	4	9	5			No	1	1	Not significant
HML0889	PS 20:2-22:6	PS	Up	0.951538	0.0252	1.2837	8	6	14	0			No	1	0.980084	Not significant
HMDB0009789	PI 16:0-20:4	PI	Down	0.951538	0.0252	0.9278	2	6	8	8			No	1	1	Not significant
HML0570	PI 22:0-22:4	PI	Down	0.951538	0.0252	0.9373	1	2	3	17			No	1	1	Not significant
HML0365	PG 18:0-22:0	PG	—	0.951538	0.0252	0.9512	7	7	14	0			No	1	0.980726	Not significant
HML1061	TAG48:2-FA18:0	Other	Down	0.951538	0.0252	0.7283	5	8	13	1			No	1	1	Not significant
HMDB0009837	PI 18:1-18:1	PI	Up	0.951538	0.0252	1.1446	7	6	13	1			No	1	1	Not significant
HML0973	TAG42:0-FA16:0	Other	—	0.951538	0.0252	1.0917	7	7	14	0			No	1	1	Not significant
HML0688	PI 18:3-20:2	PI	Down	0.951538	0.0252	0.794	0	2	2	18			No	1	1	Not significant
HML0971	TAG42:0-FA12:0	Other	Down	0.951538	0.0252	0.5288	5	6	11	3			No	1	1	Not significant
HML1365	TAG56:6-FA20:2	Other	—	0.951538	0.0252	0.929	7	7	14	0			No	1	1	Not significant
HMDB0011774	Cer d18:1/18:1	Cer	Up	0.951538	0.0252	1.0263	6	4	10	4			No	1	0.951538	Not significant
HML1281	TAG54:4-FA18:0	Other	Down	0.951538	0.0252	0.8668	6	8	14	0			No	1	1	Not significant
HML1276	TAG54:3-FA20:1	Other	—	0.951538	0.0252	0.9638	7	7	14	0			No	1	1	Not significant
HML0996	TAG44:2-FA18:2	Other	—	0.951538	0.0252	1.1069	7	7	14	0			No	1	1	Not significant
HML1268	TAG54:2-FA20:1	Other	Down	0.951538	0.0252	0.9737	6	8	14	0			No	1	1	Not significant
HML1264	TAG54:2-FA18:0	Other	—	0.951538	0.0252	0.9657	7	7	14	0			No	1	1	Not significant
HML1250	TAG53:4-FA17:0	Other	—	0.951538	0.0252	1.1322	1	1	2	20			No	1	1	Not significant
HML0656	PI 18:0-22:0	PI	Up	0.951538	0.0252	1.0137	1	0	1	25			No	1	1	Not significant
HML0671	PI 18:1-22:5	PI	—	0.951538	0.0252	1.1681	3	3	6	10			No	1	1	Not significant
HML1006	TAG46:0-FA16:0	Other	Up	0.951538	0.0252	1.1121	8	6	14	0			No	1	1	Not significant
HML0682	PI 18:2-22:5	PI	—	0.951538	0.0252	1.0183	2	2	4	15			No	1	1	Not significant
HML1017	TAG46:2-FA14:1	Other	Down	0.951538	0.0252	0.8842	6	8	14	0			No	1	1	Not significant
HML0978	TAG42:1-FA18:1	Other	—	0.951538	0.0252	0.9697	7	7	14	0			No	1	1	Not significant
HML0250	PE 18:3-20:1	PE	Up	0.951538	0.0252	1.0023	2	1	3	14			No	1	0.958055	Not significant
HML0593	PI 22:6-22:6	PI	—	0.951538	0.0252	1.0697	2	2	4	14			No	1	1	Not significant
HML1208	TAG52:4-FA18:0	Other	Up	0.951538	0.0252	1.2999	8	6	14	0			No	1	1	Not significant
HML0467	PG 20:4-22:0	PG	—	0.951538	0.0252	1.0034	2	2	4	16			No	1	0.980726	Not significant
HML1003	TAG45:1-FA18:1	Other	Down	0.951538	0.0252	0.6031	3	4	7	8			No	1	1	Not significant
HMDB0011491	LPE 22:1	LPE	Down	0.972117	0.0093	0.9994	6	7	14	0			No	1	1	Not significant
HML0438	PG 20:1-22:0	PG	Up	0.974954	0.0084	1.008	8	6	14	0			No	1	0.998733	Not significant
HML0026	DAG 20:0-20:3	DG	Up	0.974954	0.0084	1.3747	4	2	6	12			No	1	0.974954	Not significant
HML1249	TAG53:4-FA16:0	Other	Up	1	0.0084	1.6994	3	0	3	15			No	1	1	Not significant
HML1241	TAG53:1-FA18:1	Other	Up	1	0.0084	1.0582	1	0	1	23			No	1	1	Not significant
HML0587	PI 22:3-22:6	PI	—	1	0.0084		0	0	0	19			No	1	1	Not significant
HML0623	PI 16:0-18:4	PI	—	1	0.0084		0	0	0	22			No	1	1	Not significant
HML1132	TAG50:4-FA14:1	Other	Up	1	0.0084	1.2079	8	6	14	0			No	1	1	Not significant
HML1112	TAG50:1-FA18:1	Other	Up	1	0.0084	1.0189	8	6	14	0			No	1	1	Not significant
HML1120	TAG50:2-FA18:2	Other	Down	1	0.0084	0.9379	6	8	14	0			No	1	1	Not significant
HML1200	TAG52:3-FA20:0	Other	—	1	0.0084	0.987	7	7	14	0			No	1	1	Not significant
HML0367	PG 18:0-22:2	PG	Up	1	0.0084	1.1508	4	3	7	9			No	1	1	Not significant
HML1211	TAG52:4-FA18:3	Other	—	1	0.0084	1.0168	7	7	14	0			No	1	1	Not significant
HML1047	TAG48:0-FA16:0	Other	—	1	0.0084	1.0106	7	7	14	0			No	1	1	Not significant
HML1058	TAG48:2-FA14:1	Other	—	1	0.0084	0.9691	7	7	14	0			No	1	1	Not significant
HML0420	PG 20:0-20:0	PG	—	1	0.0084		0	0	0	25			No	1	1	Not significant
HML1189	TAG52:2-FA18:2	Other	Up	1	0.0084	1.567	5	4	9	5			No	1	1	Not significant
HML1187	TAG52:2-FA18:0	Other	Up	1	0.0084	1.1986	8	6	14	0			No	1	1	Not significant
HML1196	TAG52:3-FA18:0	Other	Up	1	0.0084	1.1163	8	6	14	0			No	1	1	Not significant
HMDB0009850	PI 18:2-18:2	PI	Up	1	0.0084	1.0064	1	0	1	17			No	1	1	Not significant
HMDB0009821	PI 18:0-22:6	PI	Down	1	0.0084	0.888	1	3	4	12			No	1	1	Not significant
HML0403	PG 18:3-22:4	PG	—	1	0.0084	0.9926	7	7	14	0			No	1	1	Not significant
HML1181	TAG52:1-FA18:1	Other	Up	1	0.0084	1.1139	8	4	12	2			No	1	1	Not significant
HML0894	PS 20:3-22:2	PS	—	1	0.0084	0.9523	1	1	2	19			No	1	1	Not significant
HML0868	PS 20:0-22:6	PS	—	1	0.0084		0	0	0	26			No	1	1	Not significant
HML0883	PS 20:2-22:0	PS	Up	1	0.0084	1.7003	1	0	1	26			No	1	1	Not significant
HML1389	TAG56:8-FA20:4	Other	—	1	0.0084	1.0271	7	7	14	0			No	1	1	Not significant
HML0543	PG 22:0-22:5	PG	Down	1	0.0084	0.9981	0	1	1	21			No	1	1	Not significant
HML1129	TAG50:3-FA18:3	Other	—	1	0.0084	0.9582	7	7	14	0			No	1	1	Not significant
HML1083	TAG49:0-FA15:0	Other	—	1	0.0084		0	0	0	26			No	1	1	Not significant
HML1206	TAG52:4-FA16:0	Other	Up	1	0.0084	1.0376	8	6	14	0			No	1	1	Not significant
HML1307	TAG54:6-FA18:2	Other	Down	1	0.0084	0.8252	5	9	14	0			No	1	1	Not significant
HML1306	TAG54:6-FA18:1	Other	—	1	0.0084	1.038	7	7	14	0			No	1	1	Not significant
HML1317	TAG54:7-FA18:3	Other	—	1	0.0084	0.9905	7	7	14	0			No	1	1	Not significant
HML1316	TAG54:7-FA18:2	Other	Down	1	0.0084	0.9428	6	8	14	0			No	1	1	Not significant
HML0987	TAG44:1-FA14:1	Other	Up	1	0.0084	1.1261	7	6	13	1			No	1	1	Not significant
HML1007	TAG46:0-FA18:0	Other	—	1	0.0084	1.0823	5	5	10	4			No	1	1	Not significant
HML0980	TAG42:2-FA18:2	Other	Down	1	0.0084	0.4381	6	7	13	1			No	1	1	Not significant
HML0997	TAG44:3-FA18:2	Other	Up	1	0.0084	1.0994	7	5	12	2			No	1	1	Not significant
HML1293	TAG54:5-FA18:0	Other	Down	1	0.0084	0.7785	6	8	14	0			No	1	1	Not significant
HML0990	TAG44:1-FA18:1	Other	—	1	0.0084	1.1212	7	7	14	0			No	1	1	Not significant
HML1266	TAG54:2-FA18:2	Other	—	1	0.0084		0	0	0	22			No	1	1	Not significant
HML1030	TAG46:4-FA18:2	Other	Up	1	0.0084	1.9704	8	6	14	0			No	1	1	Not significant
HML0644	PI 16:1-22:2	PI	Down	1	0.0084	0.8707	2	4	6	11			No	1	1	Not significant
HML1027	TAG46:3-FA18:1	Other	Up	1	0.0084	1.5114	8	6	14	0			No	1	1	Not significant
HML1032	TAG47:0-FA15:0	Other	—	1	0.0084	1.013	6	6	12	2			No	1	1	Not significant
HML1285	TAG54:4-FA20:1	Other	—	1	0.0084	1.0258	7	7	14	0			No	1	1	Not significant
HML1267	TAG54:2-FA20:0	Other	Up	1	0.0084	1.3447	8	6	14	0			No	1	1	Not significant
HML0716	PI 20:0-20:3	PI	—	1	0.0084		0	0	0	22			No	1	1	Not significant
HML0700	PI 18:4-20:0	PI	Down	1	0.0084	0.8805	1	2	3	16			No	1	1	Not significant
HML0712	PI 18:4-22:6	PI	Down	1	0.0084	0.9005	0	1	1	20			No	1	1	Not significant
HML0689	PI 18:3-20:3	PI	—	1	0.0084		0	0	0	23			No	1	1	Not significant
HML1328	TAG56:1-FA16:0	Other	—	1	0.0084	1.1106	7	7	14	0			No	1	1	Not significant
HML1329	TAG56:1-FA18:1	Other	—	1	0.0084	1.0216	7	7	14	0			No	1	1	Not significant
HML0056	LPE 20:0	LPE	Up	1	0.0084	1.0427	9	5	14	0			No	1	1	Not significant
HML1353	TAG56:5-FA18:2	Other	Up	1	0.0084	1.082	8	6	14	0			No	1	1	Not significant
HML0742	PI 20:2-22:0	PI	Up	1	0.0084	1.1008	1	0	1	20			No	1	1	Not significant
HML1308	TAG54:6-FA18:3	Other	—	1	0.0084	1.0427	7	7	14	0			No	1	1	Not significant
HMDB0011493	LPE 22:4	LPE	Up	1	0.0084	1.008	8	6	14	0			No	1	1	Not significant
HMDB0009399	PE 20:4-20:4	PE	Down	1	0.0084	0.99	0	2	2	18			No	1	1	Not significant
HML1411	TAG58:7-FA16:0	Other	Down	1	0.0084	0.8204	3	5	8	6			No	1	1	Not significant
HML1420	TAG58:8-FA18:2	Other	—	1	0.0084	1.0489	7	7	14	0			No	1	1	Not significant
HML1424	TAG58:8-FA22:6	Other	Down	1	0.0084	0.8339	5	9	14	0			No	1	1	Not significant

## Sheet: 81_Nominal_Lipids_p005
Unnamed: 0	Metabolite_ID	Name	Class	Direction	Paired_Wilcoxon_p	Effect_Size_r	Median_FC	N_up	N_down	Complete_pairs	N_imputed_28	Platform_FC	Platform_p	VIP	CI_lo	CI_hi	CI_excludes_1	Global_BH_q	Within_Class_q	Priority
0	HML0040	DAG 20:1-20:5	DG	Down	0.000244141	0.8641	0.9456	1	13	14	0	0.949021	0.0102901	2.15842	0.93	0.9764	Yes	0.300293	0.01123	Complete-data signal not prioritized
1	HML0382	PG 18:2-20:0	PG	Up	0.0012207	0.7969	1.2974	11	2	13	1	1.44226	0.221968	2.01114	1.213	1.5659	Yes	0.550537	0.194824	Partially imputed exploratory signal
2	HML0351	PG 16:1-22:1	PG	Up	0.00231934	0.7634	1.3548	12	2	14	0	1.36318	0.0268339	1.85367	1.0243	1.6573	Yes	0.550537	0.194824	Robust candidate
3	HML0911	PS 20:5-22:4	PS	—	0.00231934	0.7634		0	0	0	27	2862.44	0.174011	0.880117			No	0.550537	0.220032	Heavily imputed exploratory signal
4	HML0534	PE 22:4-22:6	PE	Up	0.00305176	0.7466	1.2194	12	2	14	0	1.21329	0.133801	1.09388	1.0622	1.4277	Yes	0.550537	0.192902	Complete-data signal not prioritized
5	HML0012	Cer d18:1/26:0	Cer	Up	0.00402832	0.7298	1.3082	12	2	14	0	1.31218	0.018721	1.85663	1.1595	1.6676	Yes	0.550537	0.052368	Robust candidate
6	HML0942	SM 40:4	SM	Up	0.00402832	0.7298	1.3085	11	3	14	0	1.30368	0.147783	1.50682	1.0526	1.5494	Yes	0.550537	0.139856	Complete-data signal not prioritized
7	HML0530	PE 22:3-22:5	PE	Up	0.00402832	0.7298	1.0311	9	3	12	2	1.21701	0.155434	1.58204	0.9993	1.0841	No	0.550537	0.192902	Partially imputed exploratory signal
8	HML1404	TAG58:5-FA18:1	Other	Up	0.00402832	0.7298	1.4501	11	0	11	3	1.74216	0.381	1.9296	1.0742	2.0727	Yes	0.550537	1	Partially imputed exploratory signal
9	HML0249	PE 18:3-20:0	PE	Down	0.00464943	0.7564	0.9965	0	1	2	18	0.250348	0.014265	2.22273			No	0.57188	0.192902	Heavily imputed exploratory signal
10	HML0205	PE 16:1-18:3	PE	Down	0.00524902	0.7131	0.9984	0	1	1	21	0.163382	0.0298287	2.1906			No	0.586936	0.192902	Heavily imputed exploratory signal
11	HML0943	SM 40:5	SM	Up	0.00671387	0.6963	1.44	12	2	14	0	1.42928	0.0241172	1.84184	1.0524	1.6384	Yes	0.635235	0.139856	Robust candidate
12	HMDB0010166	PS 18:0-22:5	PS	Up	0.00671387	0.6963	1.3319	12	2	14	0	1.26516	0.107602	1.52496	1.0589	1.4663	Yes	0.635235	0.220032	Complete-data signal not prioritized
13	HMDB0112434	PS 18:2-20:5	PS	Up	0.00854492	0.6795	1.0841	11	3	14	0	1.12753	0.236839	1.39737	1.0218	1.1462	Yes	0.685896	0.220032	Complete-data signal not prioritized
14	HML0898	PS 20:3-22:6	PS	Up	0.00854492	0.6795	1.2712	12	2	14	0	1.35787	0.119956	1.35268	1.0924	1.647	Yes	0.685896	0.220032	Complete-data signal not prioritized
15	HML0336	PG 16:0-22:1	PG	Up	0.0134277	0.6459	1.0872	11	3	14	0	1.11481	0.183304	1.49306	1.0255	1.1267	Yes	0.685896	0.649414	Complete-data signal not prioritized
16	HML0314	PE 20:3-22:5	PE	Up	0.0134277	0.6459	1.2006	9	3	12	2	1.54869	0.105782	1.98623	1.0077	1.5248	Yes	0.685896	0.327081	Partially imputed exploratory signal
17	HML0924	SM 37:1	SM	Up	0.0134277	0.6459	1.1707	11	3	14	0	1.20246	0.0286264	1.89664	1.0198	1.357	Yes	0.685896	0.139856	Robust candidate
18	HML0238	PE 18:1-22:3	PE	Up	0.0134277	0.6459	1.108	9	0	9	5	1.38295	0.139073	1.68958	1.054	1.1645	Yes	0.685896	0.327081	Partially imputed exploratory signal
19	HML0954	SM 42:4	SM	Up	0.0134277	0.6459	1.1173	11	3	14	0	1.12769	0.133992	1.51289	1.0221	1.2321	Yes	0.685896	0.139856	Complete-data signal not prioritized
20	HML1399	TAG58:10-FA20:5	Other	Up	0.0159064	0.6444	1.1759	10	2	13	1	1.65145	0.193118	1.6519	1.0708	2.384	Yes	0.685896	1	Partially imputed exploratory signal
21	HMDB0112429	PS 18:2-20:0	PS	Up	0.0166016	0.6292	1.2527	11	3	14	0	1.22615	0.186741	1.35681	1.1086	1.3058	Yes	0.685896	0.341992	Complete-data signal not prioritized
22	HML0933	SM 39:1	SM	Up	0.0166016	0.6292	1.2132	11	3	14	0	1.23266	0.0546448	1.74613	1.0071	1.4482	Yes	0.685896	0.139856	Complete-data signal not prioritized
23	HML0931	SM 38:4	SM	Down	0.0166016	0.6292	0.9651	4	10	14	0	0.950617	0.0431651	1.91121	0.9287	0.9961	Yes	0.685896	0.139856	Complete-data signal not prioritized
24	HMDB0009000	PE 18:0-20:2	PE	Up	0.0166016	0.6292	1.1511	11	3	14	0	1.13094	0.0856004	1.70692	1.0183	1.2326	Yes	0.685896	0.327081	Complete-data signal not prioritized
25	HMDB0009843	PI 18:1-20:3	PI	—	0.0202637	0.6124		0	0	0	22	4.99062e-05	0.00699884	2.471			No	0.685896	0.958689	Heavily imputed exploratory signal
26	HMDB0009405	PE 20:4-22:4	PE	Up	0.0202637	0.6124	1.0794	10	4	14	0	1.2206	0.132021	1.38274	1.0044	1.3312	Yes	0.685896	0.327081	Complete-data signal not prioritized
27	HMDB0009111	PE 18:2-22:6	PE	Up	0.0202637	0.6124	1.1539	11	3	14	0	1.19624	0.180052	1.40477	1.0173	1.4276	Yes	0.685896	0.327081	Complete-data signal not prioritized
28	HML0009	Cer d18:1/22:0	Cer	Up	0.0202637	0.6124	1.163	11	3	14	0	1.26753	0.159769	1.56462	1.0253	1.4589	Yes	0.685896	0.106323	Complete-data signal not prioritized
29	HML0057	LPE 22:0	LPE	Up	0.0202637	0.6124	1.0238	11	3	14	0	1.03341	0.104975	1.60855	1.008	1.0708	Yes	0.685896	0.486328	Complete-data signal not prioritized
30	HML0777	PS 16:0-20:0	PS	Up	0.0202637	0.6124	1.1223	11	3	14	0	1.19101	0.0734343	1.74862	1.0055	1.3389	Yes	0.685896	0.34786	Complete-data signal not prioritized
31	HML0626	PI 16:0-20:5	PI	Up	0.0245361	0.5956	1.2835	9	3	12	3	1.34082	0.528202	1.42136	1.003	1.4485	Yes	0.685896	0.958689	Partially imputed exploratory signal
32	HML0010	Cer d18:1/24:0	Cer	Up	0.0245361	0.5956	1.1913	12	2	14	0	1.27235	0.0556837	1.90693	1.0526	1.736	Yes	0.685896	0.106323	Complete-data signal not prioritized
33	HML0535	PE 22:5-22:5	PE	Up	0.0245361	0.5956	1.149	11	3	14	0	1.19468	0.120535	1.48098	1.0244	1.2829	Yes	0.685896	0.327081	Complete-data signal not prioritized
34	HML0928	SM 38:1	SM	Up	0.0245361	0.5956	1.0724	10	4	14	0	1.07185	0.130627	1.4145	0.9694	1.1314	No	0.685896	0.139856	Complete-data nominal signal
35	HML1312	TAG54:6-FA22:5	Other	Up	0.0245361	0.5956	1.7336	11	3	14	0	1.63851	0.150519	1.55649	1.089	2.1954	Yes	0.685896	1	Complete-data signal not prioritized
36	HMDB0010382	LPC 16:0	LPC	Up	0.0245361	0.5956	1.0557	9	5	14	0	1.03503	0.168133	1.23378	0.9933	1.0693	No	0.685896	0.251221	Complete-data nominal signal
37	HML0968	SM 44:4	SM	Up	0.0245361	0.5956	1.2049	10	4	14	0	1.26675	0.12483	1.54495	0.9945	1.5306	No	0.685896	0.139856	Complete-data nominal signal
38	HML0965	SM 44:1	SM	Up	0.0245361	0.5956	1.2404	11	3	14	0	1.20377	0.132617	1.35937	1.0767	1.3894	Yes	0.685896	0.139856	Complete-data signal not prioritized
39	HMDB0009045	PE 18:1-22:6	PE	Up	0.0245361	0.5956	1.1747	12	2	14	0	1.15261	0.154339	1.19912	1.0248	1.3435	Yes	0.685896	0.327081	Complete-data signal not prioritized
40	HML0390	PG 18:2-22:4	PG	Up	0.0245361	0.5956	1.0515	8	4	12	2	1.23181	0.152821	1.64165	0.9741	1.1375	No	0.685896	0.649414	Partially imputed exploratory signal
41	HML0934	SM 39:2	SM	Up	0.0245361	0.5956	1.134	12	2	14	0	1.17271	0.0418812	1.77089	1.0473	1.2868	Yes	0.685896	0.139856	Complete-data signal not prioritized
42	HML0754	PI 20:3-22:2	PI	Up	0.0245361	0.5956	1.2371	4	2	6	9	1.86291	0.0494697	1.95591	0.8061	1.5424	No	0.685896	0.958689	Partially imputed exploratory signal
43	HML1430	TAG60:10-FA22:5	Other	Up	0.0245361	0.5956	4.1131	5	0	5	11	2.73366	0.533685	2.01663	2.0212	4.6811	Yes	0.685896	1	Heavily imputed exploratory signal
44	HML0555	PG 22:2-22:6	PG	—	0.0280561	0.587	1	0	0	2	17	2.67422	0.056194	1.68008			No	0.735253	0.649414	Heavily imputed exploratory signal
45	HML0366	PG 18:0-22:1	PG	Up	0.029541	0.5788	1.1011	10	4	14	0	1.11231	0.180549	1.48828	0.9923	1.2649	No	0.735253	0.649414	Complete-data nominal signal
46	HML0956	SM 42:6	SM	Up	0.029541	0.5788	1.2169	10	4	14	0	1.18829	0.226078	1.32212	0.9705	1.3857	No	0.735253	0.153076	Complete-data nominal signal
47	HMDB0009109	PE 18:2-22:5	PE	Up	0.029541	0.5788	1.2145	11	3	14	0	1.3402	0.146247	1.55457	1.001	1.8401	Yes	0.735253	0.327081	Complete-data signal not prioritized
48	HML0260	PE 18:3-22:5	PE	Up	0.029541	0.5788	1.0366	7	2	9	7	1.32207	0.194143	1.20999	0.9616	1.0598	No	0.735253	0.327081	Partially imputed exploratory signal
49	HML0330	PE 20:5-22:6	PE	Up	0.032767	0.5706	1.095	11	3	14	0	1.22139	0.25364	1.24398	1.0418	1.141	Yes	0.735253	0.327081	Complete-data signal not prioritized
50	HML0319	PE 20:4-22:2	PE	Up	0.0352783	0.5621	1.1164	11	3	14	0	1.17612	0.164536	1.34377	1.0062	1.4112	Yes	0.735253	0.327081	Complete-data signal not prioritized
51	HMDB0010383	LPC 16:1	LPC	Up	0.0352783	0.5621	1.447	11	3	14	0	1.36995	0.0991859	1.56244	1.018	2.0439	Yes	0.735253	0.251221	Complete-data signal not prioritized
52	HMDB0009812	PI 18:0-20:2	PI	—	0.0352783	0.5621	1.0636	3	3	6	9	2.01555	0.0352579	2.20417	0.8048	1.3627	No	0.735253	0.958689	Partially imputed exploratory signal
53	HML0890	PS 20:3-20:3	PS	—	0.0352783	0.5621		0	0	0	26	0.000183717	0.118599	1.59401			No	0.735253	0.454208	Heavily imputed exploratory signal
54	HML0941	SM 40:3	SM	Up	0.0352783	0.5621	1.1002	9	5	14	0	1.07272	0.215464	1.4181	0.9744	1.1443	No	0.735253	0.167572	Complete-data nominal signal
55	HML0786	PS 16:1-20:0	PS	Up	0.0352783	0.5621	1.2071	12	2	14	0	1.20404	0.0864308	1.60797	1.0941	1.4039	Yes	0.735253	0.454208	Complete-data signal not prioritized
56	HMDB0010402	LPC 22:5	LPC	Up	0.0418701	0.5453	1.3409	11	3	14	0	1.22799	0.144171	1.2861	1.0888	1.499	Yes	0.735253	0.251221	Complete-data signal not prioritized
57	HML0013	Cer d18:1/26:1	Cer	Up	0.0418701	0.5453	1.1566	10	4	14	0	1.19642	0.189841	1.37955	1.0047	1.4092	Yes	0.735253	0.12854	Complete-data signal not prioritized
58	HML1305	TAG54:6-FA16:1	Other	Up	0.0418701	0.5453	1.404	12	2	14	0	1.37376	0.0976865	1.38719	1.118	2.5147	Yes	0.735253	1	Complete-data signal not prioritized
59	HML0661	PI 18:1-20:0	PI	Up	0.0418701	0.5453	1.6876	1	0	1	21	2.71293	0.160144	1.49624			No	0.735253	0.958689	Heavily imputed exploratory signal
60	HML0049	LPC 19:1	LPC	Up	0.0418701	0.5453	1.2155	10	4	14	0	1.13	0.199052	1.03185	1.0301	1.2535	Yes	0.735253	0.251221	Complete-data signal not prioritized
61	HML0519	PE 22:1-22:3	PE	—	0.0418701	0.5453		0	0	0	21	5.97813	0.0267219	2.15694			No	0.735253	0.327081	Heavily imputed exploratory signal
62	HMDB0009009	PE 18:0-22:4	PE	Up	0.0418701	0.5453	1.3884	11	3	14	0	1.30339	0.138033	1.27721	1.0738	1.7547	Yes	0.735253	0.327081	Complete-data signal not prioritized
63	HMDB0009093	PE 18:2-18:2	PE	—	0.0418701	0.5453		0	0	0	21	6.14582	0.0320053	2.0046			No	0.735253	0.327081	Heavily imputed exploratory signal
64	HMDB0009038	PE 18:1-20:5	PE	Up	0.0445008	0.537	1.0658	11	3	14	0	1.05151	0.0539837	1.67812	1.0172	1.0793	Yes	0.735253	0.327081	Complete-data signal not prioritized
65	HML0276	PE 20:0-20:1	PE	—	0.0445008	0.537	1	3	3	6	11	0.548056	0.0516247	1.65545	0.9828	1.0188	No	0.735253	0.327081	Heavily imputed exploratory signal
66	HML0556	PG 22:3-22:3	PG	—	0.0494385	0.5285		0	0	0	24	12149.6	0.037486	1.88452			No	0.735253	0.649414	Heavily imputed exploratory signal
67	HML0571	PI 22:0-22:5	PI	Up	0.0494385	0.5285	1.6297	1	0	1	17	3.40883	0.0603667	1.94463			No	0.735253	0.958689	Heavily imputed exploratory signal
68	HML0940	SM 40:2	SM	Up	0.0494385	0.5285	1.0973	10	4	14	0	1.10732	0.103875	1.65389	0.9727	1.1818	No	0.735253	0.192737	Complete-data nominal signal
69	HML0812	PS 18:1-20:1	PS	Up	0.0494385	0.5285	1.1809	11	3	14	0	1.18847	0.184329	1.32552	1.0732	1.3223	Yes	0.735253	0.459407	Complete-data signal not prioritized
70	HML0322	PE 20:4-22:6	PE	Up	0.0494385	0.5285	1.231	8	6	14	0	1.16625	0.367642	0.858373	0.8733	1.4602	No	0.735253	0.330339	Complete-data nominal signal
71	HML0629	PI 16:0-22:3	PI	Down	0.0494385	0.5285	0.9182	0	2	2	14	0.380451	0.0244636	2.13715			No	0.735253	0.958689	Heavily imputed exploratory signal
72	HML0826	PS 18:2-22:4	PS	Up	0.0494385	0.5285	1.3173	10	4	14	0	1.32201	0.177454	1.43396	0.9971	2.103	No	0.735253	0.459407	Complete-data nominal signal
73	HML0007	Cer d18:1/20:0	Cer	Up	0.0494385	0.5285	1.2258	9	5	14	0	1.29467	0.268561	1.22687	0.9216	1.8361	No	0.735253	0.12854	Complete-data nominal signal
74	HML0418	PG 18:4-22:5	PG	—	0.0494385	0.5285		0	0	0	24	3.01118	0.249334	0.998556			No	0.735253	0.649414	Heavily imputed exploratory signal
75	HML0967	SM 44:3	SM	Up	0.0494385	0.5285	1.3251	9	5	14	0	1.2937	0.130437	1.68239	0.9194	1.5792	No	0.735253	0.192737	Complete-data nominal signal
76	HML0357	PG 17:0-17:0	PG	—	0.0494385	0.5285		0	0	0	18	4.01186	0.0212567	2.28848			No	0.735253	0.649414	Heavily imputed exploratory signal
77	HML0326	PE 20:5-22:2	PE	Up	0.0494385	0.5285	1.0482	3	0	3	13	2.07998	0.0630513	1.82208	1.0182	1.2618	Yes	0.735253	0.330339	Heavily imputed exploratory signal
78	HML0045	DAG 20:1-22:5	DG	Down	0.0494385	0.5285	0.985	0	1	1	21	0.148752	0.0321932	1.94993			No	0.735253	0.799547	Heavily imputed exploratory signal
79	HML1325	TAG54:8-FA20:5	Other	Up	0.0494385	0.5285	1.3508	10	4	14	0	1.19633	0.288085	1.07141	1.0707	1.5443	Yes	0.735253	1	Complete-data signal not prioritized
80	HML0396	PG 18:3-20:3	PG	—	0.0494385	0.5285		0	0	0	23	13579.6	0.0166621	2.14683			No	0.735253	0.649414	Heavily imputed exploratory signal

## Sheet: Subclass_Distribution
Subclass	Identified	Nominal_p005	Pct
Other	459	6	1.3
PI	189	7	3.7
PG	168	10	6
PE	147	22	15
PS	103	10	9.7
SM	57	14	24.6
DG	46	2	4.3
LPC	24	4	16.7
LPE	24	1	4.2
Cer	13	5	38.5
Total	1230	81	6.6

## Sheet: 42_Energy_Metabolites
Metabolite	Class	Complete_Pairs	Missingness_Pct	Paired_Wilcoxon_p	Effect_Size_r	Median_FC	Platform_FC	Platform_p	BH_q	VIP	Direction	Quality_Assessment
Lactate	Organic acid And Its derivatives	14	0	0.008545	0.6795	1.3034	1.28555	0.020571	0.833027	2.24	insig	Good
Pyruvic acid	Organic acid And Its derivatives	14	0	0.090576	0.4614	1.2902	1.20756	0.249422	0.833027	1.41	insig	Good
Uracil	Nucleotide and Its metabolomics	12	7.1	0.151367	0.4303	1.056	1.03228	0.849698	0.945094	0.04	insig	Good
cis-Aconitic-acid	Organic acid And Its derivatives	14	0	0.153076	0.3943	1.1681	1.15568	0.149609	0.833027	1.95	insig	Good
Itaconic-acid	Organic acid And Its derivatives	14	0	0.172607	0.3775	1.291	1.23659	0.146151	0.833027	1.94	insig	Good
ATP	Nucleotide and Its metabolomics	8	21.4	0.195312	0.4951	1.4367	0.97152	0.94349	0.945094	0.52	insig	Moderate: 50-70% pairs detected
Inosine	Nucleotide and Its metabolomics	14	0	0.241211	0.3272	1.206	3.4498	0.31623	0.833027	0.69	insig	Caution: extreme outlier detected
Glucuronic-acid	Carbohydrate metabolomics	14	0	0.241211	0.3272	1.3555	1.19375	0.459216	0.852809	1	insig	Good
Cyclic-AMP	Nucleotide and Its metabolomics	12	7.1	0.266113	0.3397	1.3278	1.28007	0.164514	0.833027	1.76	insig	Good
Alpha-Ketoglutaric Acid	Organic acid And Its derivatives	14	0	0.267578	0.3104	1.2452	1.15793	0.411855	0.833027	1.11	insig	Good
Serine	Amino acids	14	0	0.267578	0.3104	0.9029	0.91763	0.256507	0.833027	1.5	insig	Good
L-Alanine	Amino acids	14	0	0.295776	0.2936	1.132	1.15343	0.30646	0.833027	1.35	insig	Good
L-Aspartate	Amino Acid metabolomics	14	0	0.325806	0.2768	0.8486	0.873154	0.299817	0.833027	0.36	insig	Good
Tyrosine	Amino acids	14	0	0.390991	0.2433	0.9294	0.864906	0.343031	0.833027	0.29	insig	Good
3-phenyllactic acid	Organic acid And Its derivatives	14	0	0.42627	0.2265	1.1429	1.13177	0.646851	0.945094	0.68	insig	Good
L-Leucine	Amino acids	14	0	0.42627	0.2265	0.953	0.892868	0.307142	0.833027	0.36	insig	Good
Dihydroxyacetone-phosphate	Phosphoric acids	13	3.6	0.454834	0.2229	1.0824	1.12644	0.194735	0.833027	1.8	insig	Good
Glycolic-acid	Carbohydrate metabolomics	13	3.6	0.454834	0.2229	0.9643	1.02659	0.85027	0.945094	0.12	insig	Good
Glyceraldehyde-3-phosphate	Phosphoric acids	8	25	0.460938	0.297	0.9975	1.33364	0.207333	0.833027	1.74	insig	Moderate: 50-70% pairs detected
L-Glutamic-acid	Amino acids	14	0	0.541626	0.1762	0.9967	1.06721	0.204825	0.833027	1	insig	Good
Glycerol-3-phosphate	Phosphoric acids	7	28.6	0.578125	0.2556	0.9054	0.038288	0.336722	0.833027	1.71	down	Caution: extreme outlier detected
Succinic Acid	Organic acid And Its derivatives	14	0	0.625732	0.1426	1.1099	1.07231	0.636156	0.945094	0.9	insig	Good
Ureidopropionate	Carbohydrate metabolomics	14	0	0.625732	0.1426	1.0699	0.855291	0.387043	0.833027	0.95	insig	Good
Glutamine	Amino acid derivatives	14	0	0.625732	0.1426	1.0242	0.907968	0.521775	0.888201	0.15	insig	Good
Threonine	Amino acids	14	0	0.625732	0.1426	1.0609	1.03864	0.765948	0.945094	0.17	insig	Good
L-Asparagine	Amino acids	14	0	0.6698	0.1258	1.0013	0.886929	0.416514	0.833027	0.47	insig	Good
L-Cystine	Amino acids	14	0	0.6698	0.1258	0.9447	0.924477	0.691513	0.945094	0.28	insig	Good
L-2-Hydroxyglutaric-acid-disodium	Carbohydrate metabolomics	14	0	0.760864	0.0923	0.9981	0.986338	0.830763	0.945094	0.51	insig	Good
Ornithine	Amino acids	14	0	0.760864	0.0923	1.0517	0.978588	0.864682	0.945094	0.34	insig	Good
Lysine	Amino acids	14	0	0.760864	0.0923	0.9746	0.905545	0.368982	0.833027	0.38	insig	Good
D-Mannose-6-phosphate	Phosphate sugars	14	0	0.807739	0.0755	1.015	1.02072	0.831563	0.945094	0.31	insig	Good
Arginine	Amino acids	14	0	0.807739	0.0755	0.9681	0.895379	0.467014	0.852809	0.71	insig	Good
Cysteic-acid	Carbohydrate metabolomics	14	0	0.855225	0.0587	0.9976	0.946027	0.596075	0.945094	0.47	insig	Good
IMP	Nucleotide and Its metabolomics	13	7.1	0.892578	0.0485	0.9895	0.986567	0.921407	0.945094	0.35	insig	Good
AMP	Nucleotide and Its metabolomics	9	25	0.910156	0.0592	0.964	1.11269	0.785379	0.945094	0.11	insig	Moderate: 50-70% pairs detected
UDP-GlcNAc	Nucleotide and Its metabolomics	7	35.7	0.9375	0.0639	0.9531	0.770597	0.40149	0.833027	0.44	insig	Moderate: 50-70% pairs detected
Phosphorylethanolamine	LPE	14	0	0.951538	0.0252	1.0977	0.982574	0.939634	0.945094	0.47	insig	Good
D(+)-Glucose	Carbohydrate metabolomics	14	0	0.951538	0.0252	0.9096	1.08321	0.528691	0.888201	0.9	insig	Good
Gluconate	Carbohydrate metabolomics	14	0	0.951538	0.0252	1.1643	1.00947	0.945094	0.945094	0.61	insig	Good
DL-Glyceric-Acid	Carbohydrate metabolomics	14	0	0.951538	0.0252	0.9845	1.02235	0.840665	0.945094	0.6	insig	Good
L-citrulline	Amino acids	14	0	1	0.0084	0.9515	0.991175	0.932748	0.945094	0.41	insig	Good
2-Oxoadipic-acid	Carbohydrate metabolomics	3	57.1			0.8349	0.671597	0.392068	0.833027	0.76	insig	Poor: <50% pairs detected
